# Supplementary material for: Quantitative proteomics reveals novel therapeutic and diagnostic markers in hypertension
Source: PubMed Central journal article supplement — BBA Clin. 2014 Oct 22;2:79–87. doi: 10.1016/j.bbacli.2014.10.001 (PMC4633972; doi:10.1016/j.bbacli.2014.10.001), 2014-10-22
Supplement: mmc1.pdf [file mmc1.pdf]

## **Supplementary Material**

### ***QUANTITATIVE PROTEOMICS REVEALS NOVEL THERAPEUTIC AND DIAGNOSTIC MARKERS IN HYPERTENSION***

Vittoria Matafora<sup>1,2</sup>, Laura Zagato<sup>3</sup>, Mara Ferrandi<sup>3</sup>, Isabella Molinari<sup>3</sup>, Gianpaolo Zerbini<sup>4</sup>,  
Nunzia Casamassima<sup>3</sup>, Chiara Lanzani<sup>3</sup>, Simona Delli Carpini<sup>3</sup>, Francesco Trepiccione<sup>2</sup>, Paolo  
Manunta<sup>3,5</sup>, Angela Bachi<sup>1\*</sup> and Giovambattista Capasso<sup>2</sup>

\*Corresponding author: Angela Bachi, IFOM-FIRC Institute of Molecular Oncology, Via  
Adamello 16, 20139 Milano, Italy. Email: [angela.bachi@ifom.eu](mailto:angela.bachi@ifom.eu), Phone: +3902574303873, Fax:  
+3902.

**Supplementary Table 1.** Total proteins identified by Maxquant analysis. For each protein group identified, in the table are reported protein name, gene name, Uniprot ID, molecular weight, posterior error probability (PEP) and relative averaged LFQ intensities for each group analysed C, SR and SS as reported in the row.

| Protein Names                                                        | Gene Names  | Uniprot  | Mol. Weight [kDa] | PEP       | Intensity | average LFQ intensity C | average LFQ intensity SR | average LFQ intensity SS |
|----------------------------------------------------------------------|-------------|----------|-------------------|-----------|-----------|-------------------------|--------------------------|--------------------------|
| 1F5 antigen                                                          | CD59        | E9PR17   | 14.529            | 0.00E+00  | 4.81E+10  | 1.57E+08                | 1.75E+08                 | 1.49E+08                 |
| Ig kappa chain C region                                              | IGKC        | P01834   | 11.609            | 0.00E+00  | 4.54E+10  | 1.97E+08                | 1.12E+08                 | 1.05E+08                 |
| Beta-trace protein                                                   | PDS         | F8W7I2   | 24.39             | 0.00E+00  | 4.15E+10  | 1.93E+08                | 1.05E+08                 | 1.34E+08                 |
| Alpha-2-thiol proteinase inhibitor                                   | BDK         | P01042-2 | 47.883            | 0.00E+00  | 3.75E+10  | 1.09E+08                | 1.28E+08                 | 1.21E+08                 |
| Bone sialoprotein 1                                                  | BNSP        | P10451   | 35.422            | 0.00E+00  | 2.28E+10  | 6.50E+07                | 9.43E+07                 | 7.68E+07                 |
| Zinc-alpha-2-glycoprotein                                            | AZGP1       | P25311   | 34.258            | 0.00E+00  | 2.09E+10  | 1.20E+08                | 3.39E+07                 | 1.01E+08                 |
| Ig gamma-2 chain C region                                            | IGHG2       | P01859   | 35.9              | 0.00E+00  | 1.67E+10  | 7.50E+07                | 5.20E+07                 | 7.25E+07                 |
| Basement membrane-specific heparan sulfate proteoglycan core protein | HSPG2       | P98160   | 468.83            | 0.00E+00  | 1.53E+10  | 5.57E+07                | 4.44E+07                 | 4.59E+07                 |
| Activation peptide fragment 1                                        | F2          | P00734   | 70.036            | 0.00E+00  | 1.52E+10  | 5.09E+07                | 5.71E+07                 | 4.91E+07                 |
| Ig lambda-2 chain C regions                                          | IGLC2       | P0CG05   | 11.293            | 0.00E+00  | 1.22E+10  | 5.87E+07                | 3.85E+07                 | 4.41E+07                 |
| Beta-1 metal-binding globulin                                        | PRO1400     | P02787   | 77.063            | 0.00E+00  | 1.05E+10  | 3.96E+07                | 3.63E+07                 | 4.62E+07                 |
| 1,4-alpha-D-glucan glucanohydrolase                                  | AMY2A       | P04746   | 57.706            | 0.00E+00  | 9.22E+09  | 3.70E+07                | 3.33E+07                 | 2.56E+07                 |
| CD44 antigen                                                         | CD44        | P16070   | 81.537            | 1.52E-153 | 7.90E+09  | 1.88E+07                | 2.23E+07                 | 2.50E+07                 |
| Alpha-1-acid glycoprotein 1                                          | AGP1        | P02763   | 23.511            | 0.00E+00  | 7.85E+09  | 4.41E+07                | 2.44E+07                 | 3.02E+07                 |
| Hepatocellular carcinoma-associated protein TB6                      | PIGR        | P01833   | 83.283            | 0.00E+00  | 7.76E+09  | 3.21E+07                | 2.91E+07                 | 2.12E+07                 |
| Ig gamma-1 chain C region                                            | IGHG1       | P01857   | 36.105            | 0.00E+00  | 6.86E+09  | 3.05E+07                | 1.34E+07                 | 1.54E+07                 |
| Epidermal growth factor                                              | EGF         | P01133   | 133.99            | 0.00E+00  | 6.06E+09  | 1.73E+07                | 2.53E+07                 | 2.75E+07                 |
| Epididymal secretory protein E4                                      | HE4         | Q14508   | 12.993            | 0.00E+00  | 6.04E+09  | 1.07E+07                | 2.53E+07                 | 2.87E+07                 |
| Ig alpha-1 chain C region                                            | IGHA1       | P01876   | 37.654            | 0.00E+00  | 5.49E+09  | 2.42E+07                | 2.46E+07                 | 1.71E+07                 |
| HP-RNase                                                             | RIB1        | P07998   | 17.644            | 0.00E+00  | 4.85E+09  | 1.77E+07                | 1.89E+07                 | 1.81E+07                 |
| Glycoprotein GP36b                                                   | C5orf8      | Q12907   | 40.228            | 0.00E+00  | 4.61E+09  | 2.19E+07                | 1.60E+07                 | 1.22E+07                 |
| Pepsinogen 5, group I (Pepsinogen A)                                 | hCG_1730399 | F8WAB4   | 41.976            | 3.78E-157 | 4.59E+09  | 1.33E+07                | 1.09E+07                 | 9.12E+06                 |
| Eosinophil-derived neurotoxin                                        | EDN         | P10153   | 18.354            | 0.00E+00  | 4.56E+09  | 1.54E+07                | 1.36E+07                 | 1.13E+07                 |
| Alpha-2-HS-glycoprotein                                              | AHSG        | F5H0Q5   | 46.6              | 0.00E+00  | 4.50E+09  | 1.93E+07                | 8.67E+06                 | 1.42E+07                 |
| Ig kappa chain V-III region SIE                                      |             | P01620   | 11.775            | 5.16E-248 | 4.17E+09  | 1.91E+07                | 1.40E+07                 | 1.16E+07                 |
| Kallikrein-1                                                         | KLK1        | P06870   | 28.889            | 3.10E-220 | 3.73E+09  | 1.25E+07                | 9.45E+06                 | 1.31E+07                 |

|                                                               |                   |          |        |           |          |          |          |          |
|---------------------------------------------------------------|-------------------|----------|--------|-----------|----------|----------|----------|----------|
| Anti-neoplastic urinary protein                               | ARS               | P55000   | 11.186 | 1.09E-172 | 3.69E+09 | 6.68E+06 | 6.89E+06 | 1.19E+07 |
| Ig kappa chain V-II region GM607                              |                   | P06309   | 12.664 | 3.91E-232 | 3.60E+09 | 1.42E+07 | 8.11E+06 | 1.02E+07 |
| Peptidoglycan recognition protein 1                           | PGLYRP            | O75594   | 21.731 | 0.00E+00  | 3.41E+09 | 1.38E+07 | 1.17E+07 | 7.11E+06 |
| Alpha-1 protease inhibitor                                    | AAT               | P01009   | 46.736 | 0.00E+00  | 3.30E+09 | 1.30E+07 | 9.89E+06 | 8.74E+06 |
| EGF-containing fibulin-like extracellular matrix protein 1    | EFEMP1            | Q12805   | 54.64  | 0.00E+00  | 3.00E+09 | 1.09E+07 | 8.58E+06 | 1.05E+07 |
| 460 kDa receptor                                              | CUBN              | O60494   | 398.73 | 0.00E+00  | 3.00E+09 | 9.11E+06 | 1.42E+07 | 1.03E+07 |
| IGFBP-rP1                                                     | IGFBP7            | Q16270   | 29.13  | 0.00E+00  | 2.97E+09 | 8.00E+06 | 8.89E+06 | 9.30E+06 |
| Aging-associated gene 4 protein                               | AAG4              | P10909-2 | 57.832 | 0.00E+00  | 2.91E+09 | 8.13E+06 | 1.17E+07 | 9.59E+06 |
| Protein slit-like 2                                           | SLITL2            | Q6EMK4   | 71.712 | 0.00E+00  | 2.90E+09 | 7.17E+06 | 8.54E+06 | 9.45E+06 |
| Actin-depolymerizing factor                                   | GSN               | P06396   | 85.696 | 0.00E+00  | 2.87E+09 | 1.56E+07 | 7.64E+06 | 8.14E+06 |
| Extracellular sulfatase Sulf-2                                | KIAA1247          | Q8IWU5   | 100.45 | 3.81E-31  | 2.86E+09 | 7.75E+06 | 7.71E+06 | 5.82E+06 |
| Alpha-1-antichymotrypsin                                      | AACT              | G3V5I3   | 50.598 | 0.00E+00  | 2.86E+09 | 1.27E+07 | 8.00E+06 | 9.99E+06 |
| Glycoprotein 330                                              | LRP2              | P98164   | 521.95 | 0.00E+00  | 2.85E+09 | 9.43E+06 | 1.24E+07 | 9.51E+06 |
| 70 kDa lysosomal alpha-glucosidase                            | GAA               | P10253   | 105.32 | 0.00E+00  | 2.84E+09 | 8.81E+06 | 1.27E+07 | 1.05E+07 |
| Leucine-rich alpha-2-glycoprotein                             | LRG               | P02750   | 38.177 | 0.00E+00  | 2.70E+09 | 1.15E+07 | 4.30E+06 | 8.98E+06 |
| Spasmolysin                                                   | SML1              | Q03403   | 14.284 | 6.38E-268 | 2.53E+09 | 6.98E+06 | 8.85E+06 | 1.64E+07 |
| Protein shisa-5                                               | PSEC0133          | Q8N114   | 25.582 | 1.29E-190 | 2.48E+09 | 7.85E+06 | 9.68E+06 | 8.93E+06 |
| Alpha-1-acid glycoprotein 2                                   | AGP2              | P19652   | 23.602 | 1.03E-279 | 2.41E+09 | 1.07E+07 | 6.78E+06 | 1.39E+07 |
| Putative uncharacterized protein CDH13                        | CDH13             | C9JRI6   | 78.301 | 0.00E+00  | 2.36E+09 | 7.27E+06 | 6.12E+06 | 6.32E+06 |
| Acrogranin                                                    | GRN               | P28799   | 63.544 | 0.00E+00  | 2.23E+09 | 7.57E+06 | 1.25E+07 | 1.59E+07 |
| Fibrillin-1                                                   | FBN               | P35555   | 312.24 | 0.00E+00  | 2.20E+09 | 6.80E+06 | 7.11E+06 | 9.74E+06 |
| Monocyte differentiation antigen CD14                         | CD14              | P08571   | 40.076 | 0.00E+00  | 2.10E+09 | 9.89E+06 | 4.71E+06 | 4.54E+06 |
| Vitelline membrane outer layer protein 1 homolog              | UNQ6350/PR O21055 | Q7Z5L0   | 21.534 | 1.87E-221 | 2.06E+09 | 5.85E+06 | 1.23E+07 | 7.73E+06 |
| AXL oncogene                                                  | AXL               | P30530   | 98.335 | 4.85E-142 | 2.01E+09 | 6.22E+06 | 6.32E+06 | 7.07E+06 |
| cDNA FLJ58826, highly similar to Plasma protease C1 inhibitor | C1IN              | E9PGN7   | 59.491 | 7.95E-298 | 1.96E+09 | 6.12E+06 | 6.97E+06 | 6.42E+06 |
| Mannan-binding lectin serine protease 2                       | MASP2             | O00187   | 75.702 | 0.00E+00  | 1.96E+09 | 1.02E+07 | 6.24E+06 | 5.22E+06 |
| CD300 antigen-like family member G                            | CD300LG           | Q6UXG3   | 36.06  | 0.00E+00  | 1.95E+09 | 5.56E+06 | 6.81E+06 | 8.42E+06 |
| Alpha-1-B glycoprotein                                        | A1BG              | P04217   | 54.253 | 6.27E-281 | 1.93E+09 | 8.30E+06 | 5.70E+06 | 8.24E+06 |

|                                                                                                                                        |           |        |        |           |          |          |          |          |
|----------------------------------------------------------------------------------------------------------------------------------------|-----------|--------|--------|-----------|----------|----------|----------|----------|
| SH3 domain-binding glutamic acid-rich-like protein 3                                                                                   | P1725     | Q9H299 | 10.438 | 1.45E-130 | 1.88E+09 | 6.77E+06 | 6.22E+06 | 5.63E+06 |
| Activated protein C receptor                                                                                                           | EPCR      | Q9UNN8 | 26.671 | 2.14E-282 | 1.85E+09 | 6.61E+06 | 6.11E+06 | 7.39E+06 |
| cDNA, FLJ96520, Homo sapiens secreted phosphoprotein 1 (osteopontin, bonesialoprotein I, early T-lymphocyte activation 1) (SPP1), mRNA | hCG_38538 | B2RDA1 | 33.843 | 0.00E+00  | 1.82E+09 | 6.83E+06 | 9.22E+06 | 8.21E+06 |
| Endosialin                                                                                                                             | CD164L1   | Q9HCU0 | 80.858 | 0.00E+00  | 1.78E+09 | 6.38E+06 | 5.79E+06 | 5.42E+06 |
| Protein K12                                                                                                                            | SECTM1    | Q8WVN6 | 27.039 | 4.14E-109 | 1.77E+09 | 8.73E+06 | 4.83E+06 | 3.91E+06 |
| Leukocyte-associated immunoglobulin-like receptor 1                                                                                    | CD305     | Q6GTX8 | 31.412 | 0.00E+00  | 1.71E+09 | 4.83E+06 | 5.96E+06 | 4.87E+06 |
| Islet cells regeneration factor                                                                                                        | PSPS      | P05451 | 18.731 | 8.18E-136 | 1.71E+09 | 7.76E+06 | 3.07E+06 | 7.83E+06 |
| Alpha-1 microglycoprotein                                                                                                              | AMBP      | P02760 | 159    | 4.72E+01  | 1.37E+11 | 6.09E+08 | 4.66E+08 | 5.56E+08 |
| Prostatic acid phosphatase                                                                                                             | ACPP      | P15309 | 44.566 | 2.28E-293 | 1.70E+09 | 7.48E+06 | 6.95E+06 | 3.89E+06 |
| Beta-defensin 1                                                                                                                        | BD1       | P60022 | 7.4197 | 3.95E-190 | 1.64E+09 | 5.70E+06 | 3.15E+06 | 3.44E+06 |
| CD55 molecule, decay accelerating factor for complement (Cromer blood group)                                                           | CD55      | B1AP13 | 49.338 | 0.00E+00  | 1.62E+09 | 5.73E+06 | 3.41E+06 | 4.55E+06 |
| Gamma-seminoprotein                                                                                                                    | APS       | P07288 | 28.741 | 1.14E-126 | 1.49E+09 | 6.34E+06 | 5.87E+06 | 3.50E+06 |
| Kringle domain-containing protein HGFL                                                                                                 | HGFL      | Q96FE7 | 28.248 | 3.84E-144 | 1.47E+09 | 3.10E+06 | 4.43E+06 | 5.68E+06 |
| Clara cell phospholipid-binding protein                                                                                                | CC10      | P11684 | 9.9937 | 3.25E-151 | 1.44E+09 | 4.83E+06 | 3.79E+06 | 4.97E+06 |
| Basement membrane autoantigen p105                                                                                                     | LGALS3BP  | Q08380 | 65.33  | 0.00E+00  | 1.44E+09 | 4.51E+06 | 7.02E+06 | 6.66E+06 |
| Deoxyribonuclease I                                                                                                                    | DNASE1    | P24855 | 31.433 | 4.23E-239 | 1.43E+09 | 5.05E+06 | 5.08E+06 | 5.38E+06 |
| HDC                                                                                                                                    | IGHG3     | P01860 | 41.287 | 3.55E-201 | 1.42E+09 | 1.01E+07 | 4.33E+06 | 5.64E+06 |
| ITIH4 protein                                                                                                                          | ITIH4     | B7ZKJ8 | 103.88 | 0.00E+00  | 1.38E+09 | 7.66E+06 | 3.99E+06 | 2.54E+06 |
| Serum-spreading factor                                                                                                                 | VTN       | P04004 | 54.305 | 0.00E+00  | 1.38E+09 | 4.50E+06 | 5.37E+06 | 4.50E+06 |
| Collagen alpha-1(VI) chain                                                                                                             | COL6A1    | P12109 | 108.53 | 0.00E+00  | 1.32E+09 | 4.65E+06 | 4.02E+06 | 2.79E+06 |
| Plasma retinol-binding protein                                                                                                         | PRO2222   | P02753 | 23.01  | 1.64E-128 | 1.32E+09 | 4.06E+06 | 4.18E+06 | 4.58E+06 |
| Ig kappa chain V-III region VG                                                                                                         |           | P04433 | 12.575 | 2.28E-85  | 1.32E+09 | 6.25E+06 | 3.09E+06 | 4.47E+06 |
| Haptoglobin                                                                                                                            | HP        | P00738 | 45.205 | 0.00E+00  | 1.26E+09 | 1.15E+07 | 2.52E+06 | 4.90E+06 |
| Cell adhesion molecule 4                                                                                                               | CADM4     | Q8NFZ8 | 42.785 | 0.00E+00  | 1.17E+09 | 3.62E+06 | 4.02E+06 | 3.59E+06 |
| Endonuclease domain-containing 1 protein                                                                                               | ENDOD1    | O94919 | 55.016 | 0.00E+00  | 1.16E+09 | 4.55E+06 | 2.80E+06 | 4.25E+06 |

|                                                          |           |          |        |           |          |          |          |          |
|----------------------------------------------------------|-----------|----------|--------|-----------|----------|----------|----------|----------|
| Entactin                                                 | NID       | P14543   | 136.38 | 1.14E-121 | 1.15E+09 | 5.53E+06 | 4.14E+06 | 3.22E+06 |
| Anastellin                                               | FN        | P02751   | 262.62 | 0.00E+00  | 1.15E+09 | 3.41E+06 | 4.39E+06 | 4.54E+06 |
| Secreted Ly-6/uPAR-related protein 2                     | SLURP2    | G3XAC2   | 14.026 | 2.24E-258 | 1.06E+09 | 3.35E+06 | 3.41E+06 | 3.10E+06 |
| Alanyl aminopeptidase                                    | ANPEP     | P15144   | 109.54 | 0.00E+00  | 1.05E+09 | 4.60E+06 | 4.39E+06 | 2.99E+06 |
| Hepatitis A virus cellular receptor 2                    | HAVCR2    | Q8TDQ0   | 33.394 | 3.27E-232 | 1.04E+09 | 3.16E+06 | 3.69E+06 | 3.16E+06 |
| Activated protein C-binding protein                      | APOH      | P02749   | 38.298 | 0.00E+00  | 9.95E+08 | 3.23E+06 | 3.03E+06 | 2.87E+06 |
| Latent-transforming growth factor beta-binding protein 2 | C14orf141 | Q14767   | 195.05 | 7.52E-197 | 9.83E+08 | 2.86E+06 | 3.86E+06 | 3.85E+06 |
| Ig lambda chain V-III region LOI                         |           | P80748   | 11.935 | 4.07E-28  | 9.67E+08 | 4.63E+06 | 2.26E+06 | 2.11E+06 |
| Beta-1B-glycoprotein                                     | HPX       | P02790   | 51.676 | 0.00E+00  | 9.43E+08 | 4.14E+06 | 3.20E+06 | 3.00E+06 |
| Cerebroside sulfate activator protein                    | GM2A      | P17900   | 20.838 | 8.73E-115 | 9.39E+08 | 4.26E+06 | 2.21E+06 | 3.34E+06 |
| Magic roundabout                                         | ROBO4     | Q8WZ75   | 107.46 | 0.00E+00  | 9.17E+08 | 3.92E+06 | 3.75E+06 | 2.28E+06 |
| Prosaposin                                               | PSAP      | B1AVU8   | 61.692 | 2.24E-138 | 9.12E+08 | 3.47E+06 | 4.36E+06 | 3.86E+06 |
| Cysteine-rich secretory protein 9                        | CRISP9    | Q6UXB8   | 49.471 | 6.25E-55  | 9.04E+08 | 3.50E+06 | 1.52E+06 | 4.23E+06 |
| Attractin                                                | ATRN      | O75882   | 158.54 | 0.00E+00  | 8.99E+08 | 2.93E+06 | 3.37E+06 | 3.31E+06 |
| Beta-2-microglobulin                                     | B2M       | P61769   | 13.714 | 6.84E-28  | 8.95E+08 | 4.26E+06 | 3.47E+06 | 1.97E+06 |
| C-type lectin domain family 3 member B                   | CLEC3B    | P05452   | 22.537 | 0.00E+00  | 8.84E+08 | 3.37E+06 | 2.95E+06 | 2.50E+06 |
| Immunoglobulin J chain                                   | IGCJ      | P01591   | 18.098 | 5.54E-158 | 8.63E+08 | 3.61E+06 | 4.10E+06 | 2.51E+06 |
| Cadherin-1                                               | CDH1      | F5GYI6   | 99.577 | 0.00E+00  | 8.62E+08 | 3.77E+06 | 2.21E+06 | 3.42E+06 |
| CCN family member 3                                      | CCN3      | P48745   | 39.162 | 1.02E-180 | 8.61E+08 | 2.95E+06 | 3.40E+06 | 4.29E+06 |
| Golgi membrane protein 1                                 | C9orf155  | Q8NBJ4   | 45.333 | 0.00E+00  | 8.55E+08 | 2.66E+06 | 3.26E+06 | 2.41E+06 |
| CD27 antigen                                             | CD27      | P26842   | 29.137 | 2.87E-176 | 8.34E+08 | 3.11E+06 | 2.88E+06 | 3.36E+06 |
| CD16a antigen                                            | CD16A     | E9PG94   | 32.561 | 4.02E-59  | 7.89E+08 | 1.78E+06 | 3.32E+06 | 2.24E+06 |
| N-acetylmuramoyl-L-alanine amidase                       | PGLYRP2   | Q96PD5-2 | 68     | 0.00E+00  | 7.81E+08 | 2.89E+06 | 1.68E+06 | 1.77E+06 |
| Developmental arteries and neural crest EGF-like protein | DANCE     | G3V4U0   | 50.881 | 0.00E+00  | 7.74E+08 | 2.65E+06 | 2.24E+06 | 2.65E+06 |
| Acrosomal serine protease inhibitor                      | PCI       | P05154   | 45.674 | 0.00E+00  | 7.63E+08 | 1.67E+06 | 3.94E+06 | 2.98E+06 |
| Putative uncharacterized protein BTN2A1                  | BTN2A1    | B9ZVU6   | 60.041 | 2.66E-116 | 7.57E+08 | 2.03E+06 | 3.18E+06 | 2.78E+06 |
| Nectin-like protein 5                                    | PVR       | P15151   | 45.302 | 4.14E-138 | 7.48E+08 | 1.78E+06 | 2.74E+06 | 2.23E+06 |
| Ig heavy chain V-III region BRO                          |           | P01766   | 13.227 | 1.50E-249 | 7.35E+08 | 4.31E+06 | 2.87E+06 | 1.58E+06 |
| Ceruloplasmin                                            | CP        | P00450   | 122.2  | 1.43E-220 | 7.31E+08 | 3.72E+06 | 2.29E+06 | 3.69E+06 |
| Gc-globulin                                              | GC        | P02774   | 52.963 | 0.00E+00  | 7.25E+08 | 2.02E+06 | 2.78E+06 | 2.49E+06 |
| Nuclear transport factor 2                               | NTF2      | P61970   | 14.478 | 0.00E+00  | 7.22E+08 | 2.87E+06 | 2.34E+06 | 1.50E+06 |
| Lanimostim                                               | CSF1      | P09603   | 60.179 | 7.03E-228 | 7.13E+08 | 1.68E+06 | 1.98E+06 | 2.16E+06 |

|                                                 |         |          |        |           |          |          |          |          |
|-------------------------------------------------|---------|----------|--------|-----------|----------|----------|----------|----------|
| Fibrinogen alpha chain                          | FGA     | P02671   | 94.972 | 0.00E+00  | 7.11E+08 | 2.18E+06 | 2.21E+06 | 1.70E+06 |
| Cystatin-3                                      | CST3    | P01034   | 15.799 | 1.25E-48  | 7.11E+08 | 2.30E+06 | 1.54E+06 | 1.60E+06 |
| Glucosamine-6-sulfatase                         | GNS     | F6S8M0   | 65.709 | 0.00E+00  | 6.98E+08 | 2.77E+06 | 2.32E+06 | 2.97E+06 |
| Collagen alpha-1(XV) chain                      | COL15A1 | P39059   | 141.72 | 2.69E-158 | 6.85E+08 | 2.02E+06 | 1.73E+06 | 1.77E+06 |
| Cystatin-6                                      | CST6    | Q15828   | 16.511 | 0.00E+00  | 6.82E+08 | 3.41E+06 | 1.69E+06 | 1.82E+06 |
| Ig kappa chain V-I region AG                    |         | P01593   | 11.992 | 0.00E+00  | 6.80E+08 | 3.01E+06 | 1.71E+06 | 1.71E+06 |
| Apolipoprotein D                                | APOD    | P05090   | 96     | 4.92E+01  | 5.10E+10 | 1.92E+08 | 1.49E+08 | 1.66E+08 |
| Breast cancer estrogen-inducible protein        | BCEI    | P04155   | 9.1494 | 3.08E-194 | 6.40E+08 | 1.77E+06 | 2.18E+06 | 3.70E+06 |
| Ig kappa chain V-III region POM                 |         | P01624   | 11.922 | 1.39E-20  | 6.39E+08 | 2.11E+06 | 1.53E+06 | 2.26E+06 |
| Liver-expressed antimicrobial peptide 2         | LEAP2   | Q969E1   | 8.8135 | 3.99E-21  | 6.29E+08 | 2.13E+06 | 1.22E+06 | 1.19E+06 |
| Ig kappa chain V-IV region B17                  |         | P06314   | 14.966 | 0.00E+00  | 6.20E+08 | 2.54E+06 | 1.38E+06 | 1.85E+06 |
| Actin, cytoplasmic 1                            | ACTB    | P60712   | 41.736 | 0.00E+00  | 6.17E+08 | 2.08E+06 | 3.27E+06 | 2.01E+06 |
| Activation peptide                              | PLG     | P00747   | 90.568 | 4.79E-281 | 6.12E+08 | 2.31E+06 | 1.92E+06 | 2.57E+06 |
| ASCR                                            | PRIP    | P04156   | 27.661 | 8.29E-63  | 5.93E+08 | 2.53E+06 | 1.99E+06 | 2.54E+06 |
| Gp80-LNGFR                                      | NGFR    | P08138   | 45.183 | 2.63E-141 | 5.87E+08 | 1.66E+06 | 2.64E+06 | 3.02E+06 |
| ABPP                                            | A4      | P05067   | 86.942 | 6.14E-53  | 5.74E+08 | 1.65E+06 | 2.49E+06 | 2.71E+06 |
| Fibulin-6                                       | FIBL6   | Q96RW7   | 613.38 | 0.00E+00  | 5.67E+08 | 1.98E+06 | 1.80E+06 | 1.64E+06 |
| Elastin microfibril interface located protein 3 | EMILIN3 | Q9H8L6   | 104.41 | 6.86E-155 | 5.63E+08 | 1.57E+06 | 1.72E+06 | 1.23E+06 |
| Vitamin K-dependent protein Z                   | PROZ    | P22891-2 | 47.053 | 6.83E-122 | 5.51E+08 | 2.08E+06 | 1.92E+06 | 2.03E+06 |
| CCN family member 5                             | CCN5    | O76076   | 26.825 | 0.00E+00  | 5.34E+08 | 1.47E+06 | 1.29E+06 | 1.31E+06 |
| Hexabrachion-like protein                       | HXBL    | E7EPZ9   | 458.38 | 0.00E+00  | 5.34E+08 | 1.53E+06 | 1.48E+06 | 2.01E+06 |
| Chondroitin sulfate proteoglycan 4              | CSPG4   | Q6UVK1   | 250.53 | 3.81E-195 | 5.34E+08 | 2.12E+06 | 1.81E+06 | 1.41E+06 |
| CD107 antigen-like family member A              | LAMP1   | P11279   | 44.882 | 2.33E-45  | 5.32E+08 | 1.44E+06 | 2.89E+06 | 2.08E+06 |
| Agrin                                           | AGRIN   | O00468   | 214.84 | 0.00E+00  | 5.26E+08 | 2.18E+06 | 1.19E+06 | 1.74E+06 |
| Mucin-like protein 1                            | MUCL1   | Q96DR8   | 9.0391 | 9.85E-32  | 5.26E+08 | 1.51E+06 | 1.37E+06 | 1.62E+06 |
| Apolipoprotein A1                               | APOA1   | P02647   | 30.777 | 3.11E-161 | 5.24E+08 | 1.41E+06 | 1.64E+06 | 1.01E+06 |
| Arylsulfatase A                                 | ARSA    | P15289   | 53.588 | 1.42E-303 | 5.00E+08 | 1.77E+06 | 1.55E+06 | 1.47E+06 |
| Herpes virus entry mediator A                   | HVEA    | Q92956   | 30.391 | 4.72E-286 | 4.99E+08 | 1.52E+06 | 2.07E+06 | 2.39E+06 |
| Ig kappa chain V-III region NG9                 |         | P01621   | 10.729 | 1.05E-68  | 4.94E+08 | 1.78E+06 | 1.43E+06 | 1.19E+06 |
| Complement component C7                         | C7      | P10643   | 93.517 | 7.64E-158 | 4.87E+08 | 9.89E+05 | 1.53E+06 | 1.53E+06 |
| Glutaminyl cyclase                              | QPCT    | Q16769   | 40.876 | 1.38E-132 | 4.82E+08 | 1.74E+06 | 1.65E+06 | 1.54E+06 |
| CD81 partner 3                                  | CD81P3  | Q969P0   | 65.033 | 4.95E-193 | 4.67E+08 | 1.91E+06 | 1.41E+06 | 1.11E+06 |
| Lysosomal acid phosphatase                      | ACP2    | P11117   | 48.344 | 1.19E-83  | 4.66E+08 | 1.47E+06 | 2.48E+06 | 1.07E+06 |
| B7 homolog 2                                    | B7H2    | O75144-2 | 34.225 | 1.24E-109 | 4.49E+08 | 1.18E+06 | 1.64E+06 | 1.69E+06 |
| gp17                                            | GCDFP15 | P12273   | 16.572 | 0.00E+00  | 4.35E+08 | 1.56E+06 | 1.27E+06 | 1.53E+06 |

|                                                              |          |          |        |           |          |          |          |          |
|--------------------------------------------------------------|----------|----------|--------|-----------|----------|----------|----------|----------|
| APP secretase                                                | CPSB     | P07858   | 37.821 | 8.08E-62  | 4.27E+08 | 1.39E+06 | 1.17E+06 | 1.98E+06 |
| Tamm-Horsfall urinary glycoprotein                           | UMOD     | E9PEA4   | 110    | 3.11E+01  | 1.27E+11 | 2.03E+08 | 7.91E+08 | 7.45E+08 |
| C1r-like serine protease analog protein                      | C1RL     | Q9NZP8   | 53.498 | 1.04E-102 | 4.20E+08 | 1.29E+06 | 1.48E+06 | 1.19E+06 |
| Serpin A7                                                    | SERPINA7 | P05543   | 46.324 | 0.00E+00  | 4.17E+08 | 1.31E+06 | 7.48E+05 | 1.13E+06 |
| ATTR                                                         | PALB     | E7EW61   | 20.294 | 3.72E-73  | 4.17E+08 | 1.36E+06 | 1.86E+06 | 1.31E+06 |
| IgLON family member 4                                        | IGLON4   | Q7Z3B1   | 38.719 | 0.00E+00  | 4.07E+08 | 1.38E+06 | 1.06E+06 | 1.28E+06 |
| Limitrin                                                     | MXRA8    | Q9BRK3-2 | 49.619 | 1.29E-190 | 3.98E+08 | 1.45E+06 | 2.27E+06 | 1.75E+06 |
| Alpha-N-acetylglucosaminidase                                | NAGLU    | P54802   | 82.265 | 0.00E+00  | 3.89E+08 | 1.86E+06 | 1.35E+06 | 1.05E+06 |
| Cell surface retention sequence-binding protein 1            | CRSBP1   | Q9Y5Y7   | 35.213 | 4.04E-79  | 3.89E+08 | 1.32E+06 | 4.57E+05 | 8.62E+05 |
| Alpha-glucosidase                                            | MGA      | E7ER45   | 312.11 | 3.27E-270 | 3.72E+08 | 1.42E+06 | 1.20E+06 | 1.22E+06 |
| Cartilage oligomeric matrix protein                          | COMP     | P49747   | 82.86  | 0.00E+00  | 3.65E+08 | 1.24E+06 | 1.39E+06 | 2.01E+06 |
| Beta-globin                                                  | HBB      | P68871   | 15.998 | 3.45E-198 | 3.48E+08 | 7.27E+05 | 1.21E+06 | 3.09E+06 |
| Osteoclast-associated immunoglobulin-like receptor           | OSCAR    | Q8IYS5-7 | 30.877 | 3.06E-164 | 3.47E+08 | 1.12E+06 | 1.39E+06 | 1.25E+06 |
| Latent-transforming growth factor beta-binding protein 4     | LTBP4    | Q8N2S1-2 | 165.74 | 6.42E-117 | 3.46E+08 | 8.94E+05 | 7.98E+05 | 1.10E+06 |
| Brain Ig-like molecule with tyrosine-based activation motifs | BIT      | P78324-2 | 55.394 | 5.30E-161 | 3.40E+08 | 1.02E+06 | 8.45E+05 | 1.23E+06 |
| Acid beta-galactosidase                                      | ELNR1    | P16278   | 76.074 | 1.13E-144 | 3.39E+08 | 1.88E+06 | 1.27E+06 | 8.31E+05 |
| UBC protein                                                  | RPS27A   | P0CG48   | 77.028 | 2.82E-116 | 3.38E+08 | 1.56E+06 | 1.40E+06 | 1.45E+06 |
| 5H9 antigen                                                  | CD9      | P21926   | 25.416 | 2.11E-43  | 3.35E+08 | 1.14E+06 | 1.67E+06 | 1.22E+06 |
| Bile salt-activated lipase                                   | BAL      | P19835   | 79.321 | 2.25E-155 | 3.25E+08 | 8.18E+05 | 1.09E+06 | 3.01E+05 |
| Beta-microseminoprotein                                      | MSMB     | P08118   | 12.865 | 2.72E-11  | 3.22E+08 | 1.31E+06 | 5.27E+05 | 7.95E+05 |
| Cadherin-2                                                   | CDH2     | P19022   | 99.808 | 1.32E-166 | 3.20E+08 | 8.34E+05 | 1.04E+06 | 1.29E+06 |
| CD300 antigen-like family member A                           | CD300A   | Q9UGN4   | 33.2   | 3.49E-27  | 3.14E+08 | 7.65E+05 | 8.13E+05 | 6.94E+05 |
| Adult folate-binding protein                                 | FOLR     | P15328   | 29.819 | 3.54E-164 | 3.11E+08 | 9.97E+05 | 1.53E+06 | 1.10E+06 |
| Pancreatic secretory trypsin inhibitor                       | PSTI     | P00995   | 8.5067 | 9.46E-149 | 3.01E+08 | 7.92E+05 | 1.22E+06 | 1.22E+06 |
| Twisted gastrulation protein homolog 1                       | PSEC0250 | Q9GZX9   | 25.017 | 3.95E-46  | 2.98E+08 | 9.14E+05 | 9.31E+05 | 7.51E+05 |
| Collagen alpha-3(VI) chain                                   | COL6A3   | P12111   | 343.67 | 4.15E-188 | 2.92E+08 | 1.12E+06 | 1.06E+06 | 1.11E+06 |
| Melanoma-associated antigen p97                              | MAP97    | P08582   | 80.214 | 5.34E-184 | 2.87E+08 | 1.42E+06 | 9.42E+05 | 4.82E+05 |
| LDH heart subunit                                            | LDHB     | P07195   | 36.638 | 3.40E-100 | 2.84E+08 | 8.70E+05 | 1.12E+06 | 9.22E+05 |
| Di-N-acetylchitobiase                                        | CTB      | Q01459   | 43.759 | 4.57E-127 | 2.81E+08 | 6.81E+05 | 4.60E+05 | 9.29E+05 |
| Carboxypeptidase N 83 kDa chain                              | ACBP     | P22792   | 60.556 | 0.00E+00  | 2.81E+08 | 8.05E+05 | 1.00E+06 | 6.29E+05 |

|                                                            |                 |          |        |           |          |          |          |          |
|------------------------------------------------------------|-----------------|----------|--------|-----------|----------|----------|----------|----------|
| Cell growth-inhibiting gene 1 protein                      | CLN2            | O14773   | 61.247 | 8.37E-108 | 2.79E+08 | 8.37E+05 | 7.04E+05 | 6.46E+05 |
| Zymogen granule protein 16 homolog B                       | UNQ773/PRO1567  | Q96DA0   | 22.739 | 1.56E-167 | 2.77E+08 | 9.51E+05 | 6.63E+05 | 6.64E+05 |
| Herpes virus entry mediator B                              | HVEB            | Q92692   | 57.741 | 5.89E-95  | 2.76E+08 | 1.17E+06 | 8.99E+05 | 6.87E+05 |
| Dermatopontin                                              | DPT             | Q07507   | 24.005 | 2.76E-120 | 2.76E+08 | 9.34E+05 | 1.32E+06 | 8.46E+05 |
| Glycoprotein 6                                             | GP6             | Q9HCN6-3 | 67.475 | 3.22E-74  | 2.74E+08 | 9.40E+05 | 1.04E+06 | 9.49E+05 |
| Breast carcinoma-associated antigen DF3                    | MUC1            | P15941-2 | 122.94 | 3.35E-275 | 2.73E+08 | 8.33E+05 | 1.01E+06 | 8.74E+05 |
| Ig heavy chain V-III region TIL                            |                 | P01765   | 11.612 | 9.91E-247 | 2.73E+08 | 1.78E+06 | 6.80E+05 | 5.71E+05 |
| Mucosal addressin cell adhesion molecule 1                 | MADCAM1         | F5H511   | 42.439 | 2.85E-94  | 2.68E+08 | 6.49E+05 | 1.21E+06 | 1.09E+06 |
| Ig mu chain C region                                       | IGHM            | P01871-2 | 51.79  | 2.54E-94  | 2.67E+08 | 1.82E+06 | 6.70E+05 | 1.09E+05 |
| 6-phosphogluconolactonase                                  | PGLS            | O95336   | 27.547 | 5.77E-41  | 2.65E+08 | 9.46E+05 | 7.83E+05 | 5.14E+05 |
| Prostate stem cell antigen                                 | PSCA            | O43653   | 12.912 | 4.93E-75  | 2.58E+08 | 7.75E+05 | 1.18E+06 | 7.37E+05 |
| Fibulin 1                                                  | CTA-941F9.7-002 | B1AHL2   | 78.329 | 6.81E-186 | 2.57E+08 | 7.57E+05 | 8.22E+05 | 8.79E+05 |
| Collagen alpha-1(XII) chain                                | COL12A1         | Q99715   | 333.14 | 7.66E-195 | 2.56E+08 | 9.25E+05 | 1.02E+06 | 1.64E+06 |
| Alpha-globin                                               | HBA1            | P69905   | 15.257 | 1.78E-33  | 2.52E+08 | 3.72E+05 | 9.15E+05 | 2.34E+06 |
| 155 kDa platelet multimerin                                | ECM             | Q13201   | 138.11 | 3.91E-21  | 2.50E+08 | 6.03E+05 | 8.97E+05 | 9.88E+05 |
| Ig superfamily receptor LNIR                               | LNIR            | Q96NY8   | 55.454 | 4.58E-163 | 2.41E+08 | 9.03E+05 | 9.00E+05 | 3.42E+05 |
| Gamma-glutamyltransferase 1                                | GGT             | P19440   | 61.409 | 0.00E+00  | 2.39E+08 | 8.60E+05 | 1.15E+06 | 5.20E+05 |
| HCNPPP                                                     | PBP             | P30086   | 21.057 | 1.44E-186 | 2.35E+08 | 9.07E+05 | 1.04E+06 | 7.06E+05 |
| Ig gamma-4 chain C region                                  | IGHG4           | P01861   | 35.94  | 0.00E+00  | 2.35E+08 | 1.43E+06 | 7.55E+05 | 2.14E+05 |
| EGF-containing fibulin-like extracellular matrix protein 2 | EFEMP2          | O95967   | 49.405 | 6.65E-61  | 2.32E+08 | 6.91E+05 | 8.37E+05 | 8.97E+05 |
| INCAM-100                                                  | L1CAM           | P19320   | 81.275 | 1.28E-213 | 2.31E+08 | 7.69E+05 | 5.28E+05 | 8.15E+05 |
| Interleukin-18-binding protein                             | IL18BP          | G3V1C5   | 21.93  | 1.12E-12  | 2.28E+08 | 6.58E+05 | 1.13E+06 | 7.87E+05 |
| Carboxypeptidase C                                         | CTSA            | P10619   | 54.465 | 6.06E-264 | 2.27E+08 | 1.08E+06 | 8.29E+05 | 8.79E+05 |
| C3B/C4B inactivator                                        | CFI             | E7ETH0   | 66.625 | 0.00E+00  | 2.27E+08 | 6.94E+05 | 1.18E+06 | 7.65E+05 |
| Hepatocyte growth factor activator inhibitor type 2        | HAI2            | O43291   | 28.228 | 2.03E-23  | 2.25E+08 | 6.84E+05 | 7.93E+05 | 6.19E+05 |
| B(2)GCN homolog                                            | EIF3A           | P56537   | 26.599 | 2.86E-154 | 2.25E+08 | 7.14E+05 | 1.05E+06 | 7.74E+05 |
| Cathepsin D                                                | CPSD            | P07339   | 44.552 | 9.51E-126 | 2.25E+08 | 6.72E+05 | 8.46E+05 | 5.58E+05 |
| Acid ceramidase                                            | ASAH            | Q13510-2 | 46.503 | 1.76E-63  | 2.24E+08 | 9.33E+05 | 1.23E+06 | 9.34E+05 |
| Nogo receptor-like 3                                       | NGRH1           | Q86UN3   | 46.105 | 1.01E-69  | 2.18E+08 | 7.12E+05 | 8.54E+05 | 9.11E+05 |



|                                                       |          |          |        |           |          |          |          |          |
|-------------------------------------------------------|----------|----------|--------|-----------|----------|----------|----------|----------|
| Antiapoptotic protein GW112                           | GW112    | Q6UX06   | 57.279 | 3.49E-227 | 2.18E+08 | 8.96E+05 | 7.87E+05 | 6.78E+05 |
| Cadherin family member 2                              | CDHF2    | F8W7U2   | 101.4  | 8.49E-112 | 2.16E+08 | 1.20E+06 | 4.34E+05 | 4.88E+05 |
| 8D6 antigen                                           | 8D6A     | Q9NPF0   | 28.991 | 5.87E-90  | 2.15E+08 | 6.10E+05 | 7.20E+05 | 6.27E+05 |
| Prostasin                                             | PRSS8    | Q16651   | 36.431 | 5.31E-13  | 2.14E+08 | 8.37E+05 | 8.23E+05 | 6.98E+05 |
| Apolipoprotein E                                      | APOE     | P02649   | 36.154 | 7.66E-120 | 2.12E+08 | 5.03E+05 | 1.02E+06 | 5.85E+05 |
| Epididymal secretory protein E1                       | HE1      | G3V3D1   | 23.699 | 0.00E+00  | 2.10E+08 | 6.60E+05 | 8.39E+05 | 8.38E+05 |
|                                                       |          | P00978   | 39.234 | 6.09E-09  | 2.05E+08 | 1.05E+06 | 4.44E+05 | 5.41E+05 |
| EFL-3                                                 | EFL3     | P98172   | 38.006 | 2.97E-62  | 2.03E+08 | 7.44E+05 | 5.13E+05 | 5.86E+05 |
| Amphiglycan                                           | SDC4     | P31431   | 21.641 | 4.00E-112 | 2.02E+08 | 6.59E+05 | 9.19E+05 | 7.16E+05 |
| 25 kDa alpha-2-microglobulin-related subunit of MMP-9 | HNL      | P80188   | 22.588 | 9.30E-181 | 1.99E+08 | 1.15E+06 | 7.61E+05 | 5.73E+05 |
| Fructose-bisphosphate aldolase B                      | ALDB     | P05062   | 39.473 | 0.00E+00  | 1.98E+08 | 7.89E+05 | 1.50E+06 | 4.98E+05 |
| Triple homeobox protein 1                             | KIAA0395 | F5H820   | 106.32 | 8.92E-04  | 1.95E+08 | 1.76E+06 | 7.63E+05 | 1.33E+06 |
| 2-oxoglutarate dehydrogenase complex component E2     | DLST     | P36957   | 48.755 | 3.00E-108 | 1.92E+08 | 5.96E+05 | 9.21E+05 | 8.49E+05 |
| Cell adhesion molecule 1                              | CADM1    | F5H0J4   | 49.633 | 1.83E-246 | 1.84E+08 | 4.99E+05 | 7.38E+05 | 6.33E+05 |
| Apolipoprotein(a)                                     | LPA      | P08519   | 501.31 | 1.62E-43  | 1.82E+08 | 6.45E+05 | 7.88E+05 | 9.11E+05 |
| Cathepsin P                                           | CTSZ     | Q9UBR2   | 33.868 | 1.52E-152 | 1.81E+08 | 6.31E+05 | 7.35E+05 | 9.50E+05 |
| Fibulin-2                                             | FBLN2    | P98095-2 | 131.86 | 5.19E-115 | 1.75E+08 | 4.96E+05 | 4.64E+05 | 5.89E+05 |
| Cathepsin C                                           | CPPI     | P53634   | 51.853 | 4.82E-111 | 1.74E+08 | 6.99E+05 | 4.88E+05 | 2.87E+05 |
| CD172 antigen-like family member B                    | SIRPB1   | O00241   | 43.211 | 1.64E-107 | 1.72E+08 | 4.14E+05 | 4.35E+05 | 5.55E+05 |
| Syndecan-1                                            | SDC      | P18827   | 32.461 | 2.91E-25  | 1.71E+08 | 6.51E+05 | 5.92E+05 | 5.52E+05 |
| Quiescin Q6                                           | QSCN6    | O00391   | 82.577 | 3.82E-195 | 1.71E+08 | 5.43E+05 | 6.25E+05 | 6.37E+05 |
| Delangin                                              | IDN3     | Q6KC79   | 316.05 | 1.02E-04  | 1.70E+08 | 3.81E+05 | 6.62E+05 | 8.94E+05 |
| Dehydropeptidase-I                                    | DPEP1    | P16444   | 45.673 | 3.26E-45  | 1.70E+08 | 8.84E+05 | 7.94E+05 | 4.34E+05 |
| Cadherin-11                                           | CDH11    | P55287   | 87.964 | 6.51E-35  | 1.67E+08 | 7.49E+05 | 6.20E+05 | 5.36E+05 |
| Lecithin-cholesterol acyltransferase                  | LCAT     | P04180   | 49.577 | 4.50E-145 | 1.67E+08 | 5.08E+05 | 4.80E+05 | 6.52E+05 |
| Complement component 4A (Rodgers blood group)         | C4A      | B0UZ83   | 192.87 | 2.24E-190 | 1.64E+08 | 8.19E+05 | 4.54E+05 | 4.07E+05 |
| Keratan sulfate proteoglycan lumican                  | LDC      | P51884   | 38.429 | 2.83E-74  | 1.61E+08 | 4.38E+05 | 5.09E+05 | 5.06E+05 |
| 1,4-alpha-D-glucan glucanohydrolase 1                 | AMY1     | P04745   | 57.767 | 0.00E+00  | 1.60E+08 | 8.45E+05 | 3.76E+05 | 4.73E+05 |
| Adipose tissue-specific secretory factor              | FIZZ3    | Q9HD89   | 11.419 | 5.57E-264 | 1.59E+08 | 5.45E+05 | 7.30E+05 | 5.80E+05 |
| Fcgamma-binding protein antigen                       | FCGBP    | Q9Y6R7   | 572.01 | 3.82E-199 | 1.56E+08 | 1.04E+06 | 2.82E+05 | 2.77E+05 |
| Carboxypeptidase M                                    | CPM      | P14384   | 50.513 | 1.68E-47  | 1.55E+08 | 5.76E+05 | 5.54E+05 | 4.99E+05 |
| Ig heavy chain V-III region GAL                       |          | P01781   | 11.771 | 3.21E-174 | 1.53E+08 | 8.32E+05 | 5.31E+05 | 4.04E+05 |

|                                                                |           |          |        |           |          |          |          |          |
|----------------------------------------------------------------|-----------|----------|--------|-----------|----------|----------|----------|----------|
| Angiotensin I                                                  | AGT       | P01019   | 53.154 | 5.64E-148 | 1.53E+08 | 7.91E+05 | 3.48E+05 | 3.54E+05 |
| ADABP                                                          | ADCP2     | P27487   | 88.278 | 1.65E-89  | 1.51E+08 | 7.99E+05 | 4.11E+05 | 7.48E+05 |
| Matrilin-4                                                     | MATN4     | O95460   | 68.486 | 1.45E-166 | 1.50E+08 | 6.14E+05 | 5.60E+05 | 9.29E+05 |
| Protein CEGP1                                                  | CEGP1     | E7EQD6   | 112.94 | 9.77E-07  | 1.46E+08 | 5.82E+05 | 2.45E+05 | 3.97E+05 |
| Ig kappa chain V-II<br>region RPMI 6410                        |           | P06310   | 14.707 | 7.28E-33  | 1.45E+08 | 8.18E+05 | 3.73E+05 | 2.07E+05 |
| Extracellular superoxide<br>dismutase [Cu-Zn]                  | SOD3      | P08294   | 25.851 | 7.53E-168 | 1.44E+08 | 4.86E+05 | 6.18E+05 | 4.70E+05 |
| Putative uncharacterized<br>protein<br>ENSP00000387251         | IGLC1     | B9A064   | 23.063 | 0.00E+00  | 1.44E+08 | 6.14E+05 | 3.71E+05 | 5.11E+05 |
| 67 kDa matrix<br>metalloproteinase-9                           | CLG4B     | P14780   | 78.457 | 1.06E-18  | 1.43E+08 | 4.25E+05 | 3.40E+05 | 5.04E+05 |
| Ig alpha-2 chain C<br>region                                   | IGHA2     | P01877   | 36.526 | 0.00E+00  | 1.43E+08 | 4.40E+05 | 7.00E+05 | 5.79E+05 |
| Afamin                                                         | AFM       | P43652   | 69.068 | 3.09E-60  | 1.41E+08 | 3.98E+05 | 6.34E+05 | 6.34E+05 |
| Bone marrow<br>proteoglycan                                    | MBP       | P13727   | 25.205 | 1.83E-44  | 1.40E+08 | 4.86E+05 | 3.80E+05 | 4.89E+05 |
| Carboxypeptidase E                                             | CPE       | P16870   | 53.15  | 6.04E-77  | 1.40E+08 | 5.04E+05 | 5.98E+05 | 2.60E+05 |
| Antithrombin-III                                               | AT3       | P01008   | 52.602 | 1.03E-31  | 1.39E+08 | 4.67E+05 | 2.48E+05 | 4.55E+05 |
| Neural cell adhesion<br>molecule 1                             | NCAM      | P13591   | 94.573 | 0.00E+00  | 1.39E+08 | 5.34E+05 | 4.78E+05 | 7.03E+05 |
| Auberger B antigen                                             | BCAM      | P50895   | 67.404 | 1.60E-80  | 1.38E+08 | 5.93E+05 | 5.81E+05 | 3.75E+05 |
| Hepatocyte growth<br>factor activator inhibitor<br>type 1      | HAI1      | O43278   | 58.397 | 1.35E-86  | 1.36E+08 | 3.98E+05 | 3.67E+05 | 3.87E+05 |
| Prolylcarboxypeptidase<br>(Angiotensinase C),<br>isoform CRA_b | hCG_27286 | A8MU24   | 58.099 | 2.69E-72  | 1.35E+08 | 5.28E+05 | 6.21E+05 | 3.44E+05 |
| GP40                                                           | CD7       | P09564   | 25.409 | 3.11E-34  | 1.35E+08 | 4.21E+05 | 4.31E+05 | 5.64E+05 |
| OPCML protein                                                  | OPCML     | B7ZLQ1   | 38.849 | 7.75E-131 | 1.29E+08 | 3.25E+05 | 2.23E+05 | 4.12E+05 |
| CAK1 antigen                                                   | MPF       | Q13421-2 | 71.491 | 5.69E-140 | 1.28E+08 | 6.46E+05 | 2.51E+05 | 3.59E+05 |
| Beta-type platelet-<br>derived growth factor<br>receptor       | PDGFRB    | P09619   | 123.97 | 4.25E-53  | 1.27E+08 | 3.66E+05 | 3.05E+05 | 3.00E+05 |
| Procollagen C-<br>endopeptidase enhancer<br>1                  | PCOLCE    | Q15113   | 47.972 | 2.79E-29  | 1.26E+08 | 4.17E+05 | 2.04E+05 | 3.38E+05 |
| Angiopoietin-like<br>protein 2                                 | ANGPTL2   | Q9UKU9   | 57.104 | 4.27E-105 | 1.24E+08 | 5.40E+05 | 5.05E+05 | 4.34E+05 |
| Intercellular adhesion<br>molecule 2                           | ICAM2     | P13598   | 30.654 | 8.02E-73  | 1.23E+08 | 3.49E+05 | 3.19E+05 | 3.77E+05 |
| Complement factor H-<br>related protein 1                      | CFHL      | Q03591   | 37.65  | 1.09E-150 | 1.21E+08 | 4.91E+05 | 4.04E+05 | 5.44E+05 |
| Cytotactin                                                     | HXB       | P24821   | 240.85 | 1.12E-214 | 1.21E+08 | 4.03E+05 | 4.31E+05 | 5.56E+05 |
| Alpha-D-galactosidase<br>A                                     | GLA       | P06280   | 48.766 | 4.54E-141 | 1.20E+08 | 4.74E+05 | 4.58E+05 | 2.96E+05 |
| Conjugase                                                      | GGH       | Q92820   | 35.964 | 2.25E-193 | 1.19E+08 | 6.73E+05 | 3.48E+05 | 4.50E+05 |
| 2-phospho-D-glycerate<br>hydro-lyase                           | ENO1      | P06733   | 47.168 | 1.11E-227 | 1.17E+08 | 3.87E+05 | 7.10E+05 | 2.77E+05 |
| Corticosteroid-binding<br>globulin                             | CBG       | P08185   | 45.14  | 1.82E-30  | 1.15E+08 | 5.88E+05 | 2.32E+05 | 2.90E+05 |
| CDw130                                                         | IL6ST     | P40189   | 103.54 | 3.55E-14  | 1.14E+08 | 3.86E+05 | 3.58E+05 | 3.29E+05 |

|                                                                   |        |          |        |           |          |          |          |          |
|-------------------------------------------------------------------|--------|----------|--------|-----------|----------|----------|----------|----------|
| Ciliary neurotrophic factor receptor subunit alpha                | CNTFR  | P26992   | 40.633 | 6.30E-24  | 1.14E+08 | 4.53E+05 | 3.23E+05 | 4.55E+05 |
| Amplixin                                                          | CTTN   | Q14247   | 61.585 | 0.00E+00  | 1.13E+08 | 1.90E+05 | 2.79E+05 | 3.01E+05 |
| Activin receptor type IB                                          | ACVR1B | P36896-4 | 61.438 | 3.35E-25  | 1.13E+08 | 2.23E+05 | 3.00E+05 | 3.14E+05 |
| C3 and PZP-like alpha-2-macroglobulin domain-containing protein 1 | C3     | P01024   | 187.15 | 0.00E+00  | 1.13E+08 | 0.00E+00 | 4.45E+05 | 2.97E+05 |
| GCTM-2 antigen                                                    | PCLP   | F5GWY5   | 58.865 | 8.24E-25  | 1.10E+08 | 3.23E+05 | 5.24E+05 | 3.52E+05 |
| Ig heavy chain V-III region VH26                                  |        | P01764   | 12.582 | 1.50E-93  | 1.09E+08 | 6.33E+05 | 3.86E+05 | 3.23E+05 |
| Big LEN                                                           | PCSK1N | Q9UHG2   | 27.372 | 3.04E-101 | 1.05E+08 | 2.73E+05 | 3.78E+05 | 2.07E+05 |
| Cell surface antigen MAX.3                                        | CD84   | Q9UIB8   | 38.782 | 7.12E-30  | 1.05E+08 | 3.16E+05 | 2.26E+05 | 2.55E+05 |
| Sushi domain-containing protein 2                                 | SUSD2  | Q9UGT4   | 90.207 | 5.90E-247 | 1.04E+08 | 3.65E+05 | 4.71E+05 | 2.69E+05 |
| Lipocalin-1                                                       | LCN1   | P31025   | 19.25  | 4.85E-57  | 1.03E+08 | 5.58E+05 | 1.26E+05 | 2.39E+05 |
| Choline phosphatase 3                                             | PLD3   | Q8IV08   | 54.705 | 6.54E-51  | 1.03E+08 | 4.11E+05 | 5.10E+05 | 3.09E+05 |
| cDNA FLJ59679, highly similar to Biotinidase (EC 3.5.1.12)        | BTD    | A6NHF2   | 61.51  | 7.85E-55  | 1.01E+08 | 3.28E+05 | 2.40E+05 | 2.68E+05 |
| Cadherin-related family member 2                                  | CDHR2  | Q9BYE9   | 141.54 | 2.11E-78  | 1.01E+08 | 4.89E+05 | 4.13E+05 | 5.14E+05 |
| Guanylate cyclase activator 2A                                    | GUCA2  | Q02747   | 12.388 | 4.41E-26  | 9.90E+07 | 3.03E+05 | 3.38E+05 | 4.38E+05 |
| Acetylcholinesterase-associated protein                           | ACHAP  | O60888-2 | 20.925 | 2.87E-06  | 9.90E+07 | 5.58E+05 | 2.17E+05 | 1.31E+05 |
| Collagen alpha-2(VI) chain                                        | COL6A2 | P12110-2 | 97.418 | 2.92E-147 | 9.75E+07 | 2.81E+05 | 4.77E+05 | 3.51E+05 |
| Thrombospondin-1                                                  | THBS1  | P07996   | 129.38 | 1.09E-104 | 9.55E+07 | 2.71E+05 | 3.00E+05 | 3.00E+05 |
| Immunoglobulin superfamily containing leucine-rich repeat protein | ISLR   | O14498   | 45.997 | 3.09E-26  | 9.52E+07 | 2.17E+05 | 2.43E+05 | 2.45E+05 |
| Cathepsin L1                                                      | CTSL   | P07711   | 37.564 | 1.75E-25  | 9.47E+07 | 2.99E+05 | 3.29E+05 | 3.34E+05 |
| Collectin placenta protein 1                                      | CLP1   | Q5KU26   | 81.514 | 4.60E-64  | 9.46E+07 | 4.37E+05 | 1.35E+05 | 1.42E+05 |
| Protein HEG homolog 1                                             | HEG1   | Q9ULI3   | 147.46 | 1.35E-93  | 9.45E+07 | 1.74E+05 | 2.96E+05 | 4.46E+05 |
| Cell surface glycoprotein MUC18                                   | MCAM   | P43121   | 71.607 | 9.26E-66  | 9.30E+07 | 3.15E+05 | 1.93E+05 | 2.28E+05 |
| 5F7                                                               | BSG    | P35613   | 42.2   | 7.35E-13  | 9.24E+07 | 2.94E+05 | 2.12E+05 | 2.40E+05 |
| Aminopeptidase A                                                  | ENPEP  | Q07075   | 109.24 | 2.51E-168 | 9.24E+07 | 4.44E+05 | 3.27E+05 | 1.77E+05 |
| Laminin B2 chain                                                  | LAMB2  | P11047   | 177.6  | 3.04E-103 | 9.07E+07 | 2.93E+05 | 2.62E+05 | 2.73E+05 |
| EndoCAM                                                           | PECAM1 | P16284   | 82.535 | 1.11E-10  | 9.01E+07 | 2.26E+05 | 3.16E+05 | 4.51E+05 |
| Biglycan                                                          | BGN    | P21810   | 41.654 | 4.63E-09  | 8.83E+07 | 2.63E+05 | 4.31E+05 | 2.91E+05 |
| Dipeptidyl aminopeptidase II                                      | DPP2   | Q9UHL4   | 54.341 | 3.25E-109 | 8.79E+07 | 3.49E+05 | 3.21E+05 | 2.97E+05 |
| Aspartyl protease 4                                               | NAP1   | O96009   | 45.386 | 2.31E-148 | 8.69E+07 | 3.64E+05 | 2.71E+05 | 2.57E+05 |
| Cyclophilin A                                                     | CYPA   | P62937   | 18.012 | 7.36E-22  | 8.54E+07 | 2.40E+05 | 3.94E+05 | 2.75E+05 |
| 1,4-alpha-D-glucan glucanohydrolase 2B                            | AMY2B  | P19961   | 57.709 | 0.00E+00  | 8.53E+07 | 3.11E+05 | 1.70E+05 | 2.08E+05 |

|                                                                                       |           |          |        |           |          |          |          |          |
|---------------------------------------------------------------------------------------|-----------|----------|--------|-----------|----------|----------|----------|----------|
| Cartilage intermediate layer protein 2                                                | CILP2     | Q8IUL8   | 126.29 | 7.90E-68  | 8.52E+07 | 3.71E+05 | 2.79E+05 | 2.97E+05 |
| COCH-5B2                                                                              | COCH      | O43405   | 59.482 | 3.16E-42  | 8.38E+07 | 2.54E+05 | 3.37E+05 | 1.79E+05 |
| cDNA FLJ55673, highly similar to Complement factor B (EC 3.4.21.47)                   | BF        | B4E1Z4   | 140.94 | 1.46E-120 | 8.18E+07 | 1.01E+05 | 3.21E+05 | 3.44E+05 |
| Close homolog of L1                                                                   | CALL      | O00533-2 | 136.7  | 2.07E-70  | 8.13E+07 | 2.59E+05 | 1.62E+05 | 2.56E+05 |
| Defensin, alpha 1                                                                     | DEF1      | P59665   | 10.201 | 2.57E-21  | 8.10E+07 | 3.71E+05 | 2.96E+05 | 5.97E+05 |
| H-Lse                                                                                 | SIAE      | Q9HAT2   | 58.314 | 9.33E-59  | 8.05E+07 | 4.15E+05 | 3.26E+05 | 3.79E+05 |
| Collagen alpha-1(XXVIII) chain                                                        | COL28     | Q2UY09   | 116.66 | 1.09E-16  | 7.95E+07 | 2.43E+05 | 2.31E+05 | 2.47E+05 |
| G-protein coupled receptor family C group 5 member C                                  | GPRC5C    | Q9NQ84-2 | 49.388 | 9.72E-51  | 7.88E+07 | 2.01E+05 | 3.12E+05 | 3.02E+05 |
| Glyceraldehyde-3-phosphate dehydrogenase                                              | CDABP0047 | P04406   | 36.053 | 7.66E-76  | 7.82E+07 | 2.01E+05 | 4.57E+05 | 3.30E+05 |
| HBV XAg-transactivated protein 4                                                      | C17orf37  | Q9BRT3   | 12.403 | 1.63E-08  | 7.80E+07 | 2.24E+05 | 4.20E+05 | 4.99E+05 |
| Protocadherin gamma-C3                                                                | PCDH2     | Q9UN70   | 101.08 | 5.05E-17  | 7.80E+07 | 3.15E+05 | 2.57E+05 | 1.67E+05 |
| Cartilage intermediate layer protein 1                                                | CILP      | O75339   | 132.56 | 1.88E-33  | 7.78E+07 | 2.60E+05 | 1.63E+05 | 2.32E+05 |
| Man(9)-alpha-mannosidase                                                              | MAN1A1    | P33908   | 72.968 | 7.64E-61  | 7.68E+07 | 1.90E+05 | 3.96E+05 | 2.07E+05 |
| Cystatin-4                                                                            | CST4      | P01036   | 16.214 | 1.02E-46  | 7.66E+07 | 2.04E+05 | 1.27E+04 | 1.63E+05 |
|                                                                                       |           | P02769   | 69.293 | 8.20E-83  | 7.57E+07 | 2.59E+05 | 3.63E+05 | 1.10E+05 |
| ABP-280-like protein                                                                  | ABPL      | Q14315   | 291.02 | 1.06E-12  | 7.39E+07 | 3.89E+05 | 3.98E+05 | 2.64E+05 |
| DDAHII                                                                                | DDAH      | O95865   | 29.644 | 5.32E-44  | 7.39E+07 | 2.17E+05 | 1.84E+05 | 1.84E+05 |
| Delta and Notch-like epidermal growth factor-related receptor                         | BET       | Q8NFT8   | 78.474 | 2.32E-61  | 7.27E+07 | 2.65E+05 | 2.18E+05 | 2.72E+05 |
| Fetomodulin                                                                           | THBD      | P07204   | 60.329 | 3.86E-87  | 7.27E+07 | 1.42E+05 | 3.03E+05 | 2.62E+05 |
| Fatty acid-binding protein 3                                                          | FABP11    | P05413   | 14.858 | 5.76E-19  | 7.23E+07 | 1.36E+05 | 1.29E+05 | 2.23E+05 |
| cDNA FLJ55176, highly similar to G-protein coupled receptor family C group 5 member B | GPRC5B    | B7Z831   | 47.695 | 6.27E-42  | 7.22E+07 | 1.60E+05 | 1.73E+05 | 2.55E+05 |
| Ig lambda chain V-I region HA                                                         |           | P01700   | 11.896 | 3.62E-11  | 7.14E+07 | 3.44E+05 | 2.35E+05 | 2.44E+05 |
| Bone morphogenetic protein receptor type II                                           | BMPR2     | Q13873   | 115.2  | 1.27E-20  | 7.06E+07 | 2.26E+05 | 2.39E+05 | 2.01E+05 |
| Ig heavy chain V-III region BUT                                                       |           | P01767   | 11.906 | 5.85E-36  | 6.99E+07 | 4.82E+05 | 1.89E+05 | 2.11E+05 |
| EPH homology kinase 3                                                                 | EHK3      | Q15375   | 112.1  | 0.00E+00  | 6.99E+07 | 1.67E+05 | 1.71E+05 | 1.71E+05 |

|                                                                        |          |          |        |           |          |          |          |          |
|------------------------------------------------------------------------|----------|----------|--------|-----------|----------|----------|----------|----------|
| Putative uncharacterized protein ENSP00000323500                       | PGCP     | B5MDX4   | 59.757 | 1.12E-84  | 6.92E+07 | 2.73E+05 | 1.91E+05 | 1.52E+05 |
| Latent-transforming growth factor beta-binding protein 1               | LTBP1    | Q14766-4 | 186.87 | 1.23E-184 | 6.90E+07 | 2.50E+05 | 1.00E+05 | 2.12E+05 |
| Fibronectin receptor subunit beta                                      | FNRB     | P05556-3 | 91.619 | 2.70E-60  | 6.74E+07 | 1.93E+05 | 3.14E+05 | 2.14E+05 |
| Triosephosphate isomerase                                              | TPI      | P60174   | 30.791 | 4.02E-134 | 6.71E+07 | 2.29E+05 | 3.19E+05 | 1.98E+05 |
| Calcium-independent alpha-latrotoxin receptor 1                        | KIAA0821 | O94910   | 162.71 | 1.63E-21  | 6.63E+07 | 2.40E+05 | 2.68E+05 | 2.42E+05 |
| Retinoid-inducible serine carboxypeptidase                             | MSTP034  | Q9HB40   | 50.83  | 1.04E-46  | 6.63E+07 | 2.73E+05 | 2.19E+05 | 2.14E+05 |
| CDw90                                                                  | THY1     | E9PNQ8   | 18.164 | 1.16E-53  | 6.57E+07 | 2.46E+05 | 1.63E+05 | 1.77E+05 |
| Apolipoprotein A2                                                      | APOA2    | P02652   | 11.175 | 5.51E-30  | 6.49E+07 | 1.57E+05 | 1.72E+05 | 7.29E+04 |
| Cadherin-like protein 1                                                | PCDH1    | Q08174-2 | 133.72 | 4.66E-47  | 6.47E+07 | 2.37E+05 | 1.35E+05 | 1.63E+05 |
| Putative uncharacterized protein RNASET2                               | RNASET2  | C9JIU8   | 35.335 | 5.86E-38  | 6.43E+07 | 2.42E+05 | 2.20E+05 | 2.58E+05 |
| Receptor-type tyrosine-protein phosphatase gamma                       | PTPG     | P23470   | 162    | 1.07E-70  | 6.43E+07 | 2.44E+05 | 1.98E+05 | 1.70E+05 |
| Sodium pump subunit alpha-2                                            | ATP1A2   | P50993   | 112.26 | 8.57E-04  | 6.41E+07 | 0.00E+00 | 5.24E+04 | 6.27E+04 |
| Density-enhanced phosphatase 1                                         | DEP1     | Q12913   | 145.94 | 2.51E-30  | 6.40E+07 | 1.85E+05 | 2.92E+05 | 1.61E+05 |
| NHL repeat-containing protein 3                                        | NHLRC3   | Q5JS37   | 38.282 | 2.15E-20  | 6.39E+07 | 2.35E+05 | 2.16E+05 | 2.40E+05 |
| 4Ig-B7-H3                                                              | B7H3     | Q5ZPR3   | 57.235 | 4.96E-66  | 6.39E+07 | 1.95E+05 | 1.26E+05 | 1.82E+05 |
| Epididymis-specific alpha-mannosidase                                  | KIAA0935 | Q9Y2E5   | 113.98 | 8.94E-87  | 6.38E+07 | 1.46E+05 | 1.34E+05 | 1.58E+05 |
| Fibroblast growth factor-inducible immediate-early response protein 14 | FN14     | Q9NP84   | 13.911 | 1.66E-06  | 6.18E+07 | 2.14E+05 | 1.18E+05 | 1.06E+05 |
| Fatty acid-binding protein 1                                           | FABP1    | P07148   | 14.208 | 2.09E-27  | 6.12E+07 | 3.81E+05 | 1.59E+05 | 1.60E+05 |
| Kinase-related protein                                                 | MLCK     | Q15746   | 210.71 | 2.98E-28  | 6.11E+07 | 1.24E+05 | 2.83E+05 | 2.00E+05 |
| C-type lectin domain family 14 member A                                | C14orf27 | Q86T13   | 51.635 | 3.26E-51  | 5.92E+07 | 2.07E+05 | 1.53E+05 | 9.44E+04 |
| Antigen AC133                                                          | MSTP061  | O43490   | 97.201 | 1.36E-47  | 5.85E+07 | 1.90E+05 | 3.06E+05 | 3.06E+05 |
| Aminoacylase-1                                                         | ACY1     | Q03154   | 45.884 | 3.47E-29  | 5.77E+07 | 1.92E+05 | 4.98E+05 | 1.89E+05 |
| C-type lectin domain family 4 member G                                 | CLEC4G   | Q6UXB4   | 32.561 | 1.36E-07  | 5.68E+07 | 1.64E+05 | 4.26E+04 | 1.71E+05 |
|                                                                        |          | P01966   | 15.184 | 4.97E-13  | 5.67E+07 | 1.05E+05 | 2.29E+05 | 4.82E+05 |
| Uncharacterized protein C2orf81                                        | C2orf81  | G3XAA6   | 64.084 | 1.83E-04  | 5.65E+07 | 1.71E+05 | 1.00E+05 | 1.63E+05 |
| Alpha-dystroglycan                                                     | DAG1     | Q14118   | 97.44  | 7.08E-73  | 5.58E+07 | 2.47E+05 | 1.99E+05 | 1.39E+05 |
| CCN family member 2                                                    | CCN2     | P29279   | 38.091 | 5.88E-54  | 5.52E+07 | 2.00E+05 | 1.72E+05 | 1.95E+05 |

|                                                                                               |           |        |        |           |          |          |          |          |
|-----------------------------------------------------------------------------------------------|-----------|--------|--------|-----------|----------|----------|----------|----------|
| Melanoma differentiation-associated protein 9                                                 | MDA9      | O00560 | 32.444 | 1.26E-63  | 5.50E+07 | 1.11E+05 | 1.68E+05 | 1.73E+05 |
| Carboxypeptidase, vitellogenic-like                                                           | CPVL      | Q9H3G5 | 54.163 | 2.51E-179 | 5.49E+07 | 1.72E+05 | 2.72E+05 | 1.41E+05 |
| Protein FAM3C                                                                                 | FAM3C     | Q92520 | 24.68  | 3.00E-44  | 5.29E+07 | 1.94E+05 | 1.69E+05 | 8.27E+04 |
| CD85 antigen-like family member F                                                             | ILT11     | A6NI73 | 32.755 | 5.89E-22  | 5.22E+07 | 1.78E+05 | 2.75E+05 | 1.94E+05 |
| Urokinase-type plasminogen activator                                                          | PLAU      | P00749 | 48.507 | 9.90E-66  | 5.19E+07 | 1.54E+05 | 3.47E+05 | 2.86E+05 |
| Cervical mucin                                                                                | MUC5      | E9PBJ0 | 596.68 | 4.99E-64  | 5.19E+07 | 2.82E+05 | 1.11E+05 | 4.66E+04 |
| Hepatocyte growth factor activator                                                            | HGFAC     | D6RAR4 | 71.482 | 1.29E-08  | 5.16E+07 | 1.51E+05 | 1.75E+05 | 2.24E+05 |
| Beta-actin-like protein 2                                                                     | ACTBL2    | Q562R1 | 42.003 | 7.98E-209 | 5.12E+07 | 1.62E+05 | 2.51E+05 | 3.07E+05 |
| Epidermal-type fatty acid-binding protein                                                     | FABP5     | Q01469 | 15.164 | 2.89E-146 | 5.02E+07 | 8.63E+03 | 2.75E+05 | 1.22E+05 |
| Acetylneuraminyl hydrolase                                                                    | NANH      | Q99519 | 45.467 | 6.33E-32  | 4.99E+07 | 1.42E+05 | 1.42E+05 | 1.46E+05 |
| 1-O-acylceramide synthase                                                                     | LYPLA3    | Q8NCC3 | 46.657 | 6.69E-78  | 4.85E+07 | 2.32E+05 | 2.19E+05 | 1.27E+05 |
| Abhydrolase domain-containing protein 14B                                                     | ABHD14B   | Q96IU4 | 22.345 | 1.22E-23  | 4.84E+07 | 1.66E+05 | 9.39E+04 | 6.99E+04 |
| Neurotrophic tyrosine kinase, receptor-related 1                                              | NTRKR1    | Q01973 | 104.28 | 1.69E-61  | 4.82E+07 | 1.13E+05 | 9.07E+04 | 1.22E+05 |
| Peptide O-xylosyltransferase 1                                                                | XT1       | Q86Y38 | 107.57 | 2.60E-16  | 4.81E+07 | 1.12E+05 | 2.21E+05 | 1.55E+05 |
| cDNA FLJ32696 fis, clone TESTI2000358                                                         | IST1      | A8KAH5 | 41.565 | 1.04E-27  | 4.76E+07 | 1.43E+05 | 2.94E+05 | 1.38E+05 |
| Neurosecretory protein VGF                                                                    | VGF       | O15240 | 67.257 | 1.12E-13  | 4.75E+07 | 1.33E+05 | 1.31E+05 | 1.30E+05 |
| Transmembrane protein 149                                                                     | TMEM149   | Q9H665 | 37.894 | 6.22E-13  | 4.73E+07 | 1.12E+05 | 1.64E+05 | 1.67E+05 |
| Ephrin type-B receptor 4                                                                      | EPHB4     | P54760 | 108.27 | 4.63E-56  | 4.73E+07 | 1.79E+05 | 1.56E+05 | 2.19E+05 |
| Ig kappa chain V-I region Scw                                                                 |           | P01609 | 11.764 | 3.20E-278 | 4.72E+07 | 2.40E+05 | 6.77E+04 | 1.10E+05 |
| Complement component C6                                                                       | C6        | P13671 | 104.79 | 1.15E-12  | 4.72E+07 | 2.45E+05 | 1.24E+05 | 2.83E+05 |
| p75                                                                                           | TNFBFR    | P20333 | 48.291 | 8.89E-79  | 4.70E+07 | 1.13E+05 | 1.56E+05 | 1.69E+05 |
| Receptor expressed in lymphoid tissues                                                        | RELT      | Q969Z4 | 46.091 | 1.04E-30  | 4.70E+07 | 9.98E+04 | 2.00E+05 | 9.74E+04 |
| Epidermal growth factor-like protein 9                                                        | DLK2      | Q6UY11 | 40.547 | 1.23E-32  | 4.66E+07 | 1.47E+05 | 1.29E+05 | 1.68E+05 |
| Ig kappa chain V-I region EU                                                                  |           | P01598 | 11.788 | 3.35E-62  | 4.66E+07 | 2.43E+05 | 1.33E+05 | 1.25E+05 |
| Intestinal trefoil factor                                                                     | ITF       | E9PBB5 | 10.181 | 9.95E-11  | 4.60E+07 | 2.11E+05 | 1.17E+05 | 9.32E+04 |
| 26S protease regulatory subunit 8                                                             | PSMC5     | P62195 | 45.626 | 1.02E-03  | 4.56E+07 | 7.11E+04 | 1.60E+05 | 9.94E+04 |
| Toll-like receptor adapter molecule 2 (TICAM-2) (Putative NF-kappa-B-activating protein 502). | hCG_37564 | Q6JUT2 | 46.172 | 7.32E-18  | 4.49E+07 | 1.98E+05 | 1.46E+05 | 1.80E+05 |

|                                                   |          |        |        |           |          |          |          |          |
|---------------------------------------------------|----------|--------|--------|-----------|----------|----------|----------|----------|
| Monocyte activation antigen Mo3                   | MO3      | Q03405 | 36.978 | 7.91E-48  | 4.49E+07 | 1.24E+05 | 1.96E+05 | 1.07E+05 |
| Ig lambda chain V-III region SH                   |          | P01714 | 11.392 | 2.62E-30  | 4.39E+07 | 1.88E+05 | 1.52E+05 | 1.40E+05 |
| I-beta-1,3-N-acetylglucosaminyltransferase        | B3GNT1   | O43505 | 47.119 | 2.36E-25  | 4.35E+07 | 1.02E+05 | 1.12E+05 | 7.16E+04 |
| Hemicentin-2                                      | HMCN2    | Q8NDA2 | 542.49 | 2.44E-09  | 4.33E+07 | 1.45E+05 | 1.29E+05 | 2.39E+05 |
| Extracellular glutathione peroxidase              | GPX3     | P22352 | 25.57  | 1.14E-19  | 4.32E+07 | 1.23E+05 | 1.85E+05 | 2.11E+05 |
| Contactin-1                                       | CNTN1    | Q12860 | 113.32 | 1.58E-33  | 4.26E+07 | 1.01E+05 | 1.47E+05 | 8.02E+04 |
| Betaine--homocysteine S-methyltransferase I       | BHMT     | Q93088 | 44.998 | 1.24E-153 | 4.25E+07 | 6.93E+04 | 5.45E+05 | 1.61E+05 |
| Pappalysin-2                                      | PAPPA2   | Q9BXP8 | 198.54 | 1.12E-21  | 4.24E+07 | 1.46E+05 | 1.42E+05 | 7.67E+04 |
| 14-3-3 protein zeta/delta                         | YWHAZ    | E7EX29 | 28.036 | 3.45E-54  | 4.22E+07 | 1.19E+05 | 2.23E+05 | 8.96E+04 |
| Brain-enriched hyaluronan-binding protein         | BCAN     | Q96GW7 | 99.117 | 6.34E-05  | 4.16E+07 | 1.02E+05 | 1.90E+05 | 1.34E+05 |
| Apolipoprotein A4                                 | APOA4    | P06727 | 45.398 | 1.63E-56  | 4.13E+07 | 1.42E+05 | 5.53E+04 | 4.38E+05 |
| Glucocorticoid-inducible protein 5                | GIS5     | Q9GZM7 | 52.387 | 3.04E-38  | 4.09E+07 | 1.07E+05 | 1.83E+05 | 2.42E+05 |
| High endothelial venule protein                   | SPARCL1  | Q14515 | 75.207 | 7.03E-90  | 4.08E+07 | 1.05E+05 | 2.58E+05 | 5.07E+04 |
| Follistatin-like protein 1                        | FRP      | Q12841 | 34.985 | 2.98E-31  | 4.06E+07 | 1.25E+05 | 1.55E+05 | 1.12E+05 |
| UPF0624 protein C6orf186                          | C6orf186 | Q5JXM2 | 41.33  | 2.11E-03  | 4.03E+07 | 2.31E+05 | 3.06E+04 | 0.00E+00 |
| Kaliocin-1                                        | LF       | P02788 | 78.181 | 1.05E-225 | 4.01E+07 | 4.97E+04 | 3.29E+05 | 7.83E+05 |
| Glutathione S-transferase P                       | FAEES3   | P09211 | 23.356 | 3.32E-167 | 4.00E+07 | 1.81E+05 | 2.38E+05 | 7.75E+04 |
| Alpha-1 type I collagen                           | COL1A1   | P02452 | 138.94 | 6.41E-46  | 3.97E+07 | 1.97E+05 | 9.15E+04 | 1.59E+05 |
| Aggrecan core protein                             | ACAN     | E7EX88 | 261.33 | 1.75E-70  | 3.91E+07 | 6.03E+04 | 1.00E+05 | 1.55E+05 |
| Actin-binding protein 280                         | FLN      | P21333 | 280.74 | 1.79E-39  | 3.91E+07 | 1.78E+05 | 1.32E+05 | 1.09E+05 |
| Alpha-2-macroglobulin receptor                    | A2MR     | Q07954 | 504.6  | 8.94E-25  | 3.90E+07 | 6.17E+04 | 1.12E+05 | 1.15E+05 |
| Gamma-glutamyltransferase 6                       | GGT6     | Q6P531 | 50.509 | 7.02E-29  | 3.88E+07 | 1.44E+05 | 1.16E+05 | 9.77E+04 |
| cDNA FLJ57265, highly similar to Neurotrimin      | IGLON2   | B7Z1Z5 | 39.209 | 1.79E-14  | 3.83E+07 | 1.35E+05 | 7.71E+04 | 1.34E+05 |
| E3 ubiquitin-protein ligase RNF167                | LP2254   | Q9H6Y7 | 38.298 | 1.06E-06  | 3.82E+07 | 7.70E+04 | 2.72E+05 | 9.86E+04 |
| Integrin-alpha FG-GAP repeat-containing protein 1 | CDA08    | Q8TB96 | 68.107 | 1.02E-64  | 3.81E+07 | 1.13E+05 | 1.07E+05 | 6.75E+04 |
| Metallothionein-1X                                | MT1X     | P80297 | 6.0683 | 8.87E-20  | 3.81E+07 | 9.25E+04 | 1.97E+05 | 1.40E+05 |
| Anthrax toxin receptor 1                          | ANTXR1   | Q9H6X2 | 62.788 | 1.59E-48  | 3.79E+07 | 1.79E+05 | 7.65E+04 | 1.69E+05 |
| Immunoglobulin superfamily DCC subclass member 2  | IGDCC2   | Q92859 | 160.01 | 1.07E-40  | 3.78E+07 | 9.01E+04 | 8.37E+04 | 9.33E+04 |

|                                                  |          |        |        |           |          |          |          |          |
|--------------------------------------------------|----------|--------|--------|-----------|----------|----------|----------|----------|
| Beta-hexosaminidase subunit alpha                | HEXA     | P06865 | 60.702 | 1.49E-16  | 3.78E+07 | 1.04E+05 | 9.83E+04 | 9.02E+04 |
| Probable G-protein coupled receptor 116          | GPR116   | Q8IZF2 | 149.46 | 7.60E-17  | 3.70E+07 | 1.04E+05 | 5.54E+04 | 1.10E+05 |
| 76 kDa protein                                   | PLBD2    | Q8NHP8 | 65.471 | 1.78E-44  | 3.70E+07 | 7.81E+04 | 1.27E+05 | 1.71E+05 |
| C-type lectin domain family 8 member A           | CLEC8A   | P78380 | 30.959 | 4.06E-66  | 3.69E+07 | 1.43E+05 | 1.78E+05 | 1.29E+05 |
| Alpha-galactosidase B                            | NAGA     | P17050 | 46.564 | 2.13E-17  | 3.67E+07 | 1.88E+05 | 1.19E+05 | 1.05E+05 |
| Insulin-like growth factor-binding protein 2     | BP2      | P18065 | 34.814 | 1.59E-80  | 3.67E+07 | 7.53E+04 | 1.83E+05 | 1.32E+05 |
| Ras-related protein Rab-5B                       | RAB5B    | P61020 | 23.707 | 8.41E-05  | 3.61E+07 | 2.50E+05 | 1.93E+05 | 1.81E+05 |
| Beta-glucan receptor                             | BGR      | Q9BXN2 | 27.627 | 3.98E-57  | 3.58E+07 | 8.73E+04 | 1.45E+05 | 2.13E+05 |
| Lubricin                                         | MSF      | Q92954 | 151.08 | 2.83E-07  | 3.57E+07 | 8.25E+04 | 4.71E+04 | 9.10E+04 |
| Endothelial cell-selective adhesion molecule     | ESAM     | Q96AP7 | 41.176 | 2.16E-28  | 3.57E+07 | 1.37E+05 | 2.16E+04 | 8.82E+04 |
| Cadherin-14                                      | CDH14    | P55291 | 88.915 | 1.61E-36  | 3.55E+07 | 1.76E+05 | 1.51E+05 | 7.83E+04 |
| D-fructose-1,6-bisphosphate 1-phosphohydrolase 1 | FBP      | P09467 | 36.842 | 1.18E-61  | 3.50E+07 | 1.46E+05 | 2.01E+05 | 7.16E+04 |
| Fetal antigen 1                                  | DLK      | P80370 | 41.3   | 4.57E-16  | 3.49E+07 | 7.36E+04 | 1.87E+05 | 2.97E+05 |
| Neurotrophic tyrosine kinase, receptor-related 2 | NTRKR2   | Q01974 | 104.76 | 4.25E-20  | 3.48E+07 | 8.07E+04 | 6.18E+04 | 8.00E+04 |
| Carboxypeptidase Z                               | CPZ      | Q66K79 | 73.655 | 1.22E-08  | 3.44E+07 | 6.75E+04 | 8.50E+04 | 1.52E+05 |
| Complement factor H-related protein 2            | CFHL2    | P36980 | 30.65  | 1.70E-120 | 3.43E+07 | 1.48E+05 | 8.93E+04 | 1.32E+05 |
| 14-3-3 protein epsilon                           | YWHAE    | P62258 | 29.174 | 2.77E-16  | 3.42E+07 | 1.18E+05 | 2.65E+05 | 7.95E+04 |
| Antileukoproteinase                              | SLPI     | P03973 | 14.326 | 8.23E-14  | 3.40E+07 | 8.95E+04 | 7.75E+04 | 1.32E+05 |
| Alpha-2-antiplasmin                              | AAP      | P08697 | 54.565 | 8.61E-23  | 3.36E+07 | 1.32E+05 | 1.58E+05 | 1.20E+05 |
| Chondroitinsulfatase                             | GALNS    | P34059 | 58.025 | 2.50E-19  | 3.35E+07 | 1.78E+05 | 1.46E+05 | 9.25E+04 |
| Intercellular adhesion molecule 1                | ICAM1    | P05362 | 57.825 | 1.12E-24  | 3.33E+07 | 8.04E+04 | 6.76E+04 | 7.33E+04 |
| Ig kappa chain V-I region AU                     |          | P01594 | 11.939 | 3.22E-232 | 3.33E+07 | 1.76E+05 | 5.26E+04 | 7.46E+04 |
| Ecto-ADP-ribosyltransferase 3                    | ART3     | Q13508 | 43.923 | 1.25E-16  | 3.32E+07 | 1.40E+05 | 1.32E+05 | 2.07E+05 |
| Ephrin type-B receptor 6                         | EPHB6    | O15197 | 110.7  | 1.30E-24  | 3.31E+07 | 1.35E+05 | 9.07E+04 | 6.33E+04 |
| Prothymosin alpha                                | PTMA     | P06454 | 12.203 | 5.21E-60  | 3.26E+07 | 1.16E+05 | 1.51E+05 | 1.19E+05 |
| CNDP dipeptidase 2                               | CN2      | Q96KP4 | 52.878 | 1.92E-14  | 3.21E+07 | 1.04E+05 | 2.45E+05 | 8.54E+04 |
| Cadherin-19                                      | CDH19    | Q96JQ0 | 346.18 | 3.44E-08  | 3.21E+07 | 9.77E+04 | 8.07E+04 | 5.91E+04 |
| Butyrophilin B7-DC                               | B7DC     | Q9BQ51 | 30.957 | 5.15E-21  | 3.21E+07 | 1.31E+05 | 9.22E+04 | 1.11E+05 |
| Protocadherin-12                                 | PCDH12   | Q9NPG4 | 128.99 | 8.88E-44  | 3.19E+07 | 1.71E+05 | 7.30E+04 | 6.76E+04 |
| Phosphatidylethanolamine-binding protein 4       | CORK1    | Q96S96 | 25.733 | 6.33E-08  | 3.13E+07 | 9.74E+04 | 9.70E+04 | 1.40E+05 |
| Laminin subunit alpha-5                          | KIAA0533 | O15230 | 399.73 | 2.02E-152 | 3.05E+07 | 8.03E+04 | 1.00E+05 | 6.42E+04 |
| Beta-G1                                          | GUSB     | P08236 | 74.731 | 1.25E-31  | 3.02E+07 | 2.70E+05 | 0.00E+00 | 1.34E+04 |



|                                             |         |          |        |           |          |          |          |          |
|---------------------------------------------|---------|----------|--------|-----------|----------|----------|----------|----------|
|                                             |         | E9PC04   | 53.146 | 6.54E-19  | 3.01E+07 | 1.63E+05 | 8.56E+04 | 1.05E+05 |
| Filamin B                                   | FLNB    | B2ZZ83   | 281.63 | 8.53E-16  | 2.99E+07 | 7.04E+04 | 5.80E+04 | 1.71E+05 |
| Kallikrein inhibitor                        | KST     | P29622   | 48.541 | 3.23E-24  | 2.98E+07 | 4.61E+04 | 3.03E+04 | 5.03E+04 |
| AIG2-like domain-containing protein 1       | A2LD1   | Q9BVM4   | 17.328 | 1.08E-33  | 2.96E+07 | 1.11E+05 | 1.66E+05 | 6.08E+04 |
| E48 antigen                                 | E48     | Q14210   | 13.286 | 5.39E-09  | 2.94E+07 | 5.13E+04 | 6.81E+04 | 2.47E+04 |
| Carcinoembryonic antigen CGM6               | CEACAM8 | P31997   | 38.153 | 1.78E-30  | 2.94E+07 | 1.12E+05 | 5.13E+04 | 4.14E+04 |
| Cathepsin H                                 | CPSB    | P09668   | 37.393 | 5.65E-17  | 2.85E+07 | 4.73E+04 | 8.15E+04 | 6.96E+04 |
| CCP module-containing protein 22            | C9orf13 | Q4LDE5   | 390.17 | 1.22E-03  | 2.84E+07 | 0.00E+00 | 0.00E+00 | 1.24E+05 |
| Herpes virus entry mediator C               | HVEC    | Q15223   | 57.157 | 1.17E-10  | 2.84E+07 | 5.02E+04 | 2.06E+04 | 8.87E+04 |
| Lymphocyte function-associated antigen 3    | CD58    | P19256   | 28.147 | 1.31E-40  | 2.80E+07 | 4.42E+04 | 7.51E+04 | 1.05E+05 |
| Glypican-3                                  | GPC3    | P51654   | 65.562 | 5.14E-16  | 2.79E+07 | 1.07E+05 | 7.16E+04 | 3.95E+04 |
| Heat shock 70 kDa protein 8                 | HSC70   | P11142   | 70.897 | 2.65E-59  | 2.78E+07 | 1.10E+05 | 1.94E+05 | 8.45E+04 |
| C2-PI3K                                     | PIK3C2B | O00750   | 184.77 | 4.53E-04  | 2.71E+07 | 0.00E+00 | 0.00E+00 | 7.64E+04 |
| Cell migration-inducing gene 10 protein     | MIG10   | P00558   | 44.614 | 1.98E-66  | 2.70E+07 | 1.10E+05 | 7.03E+04 | 4.26E+04 |
| Calcium-independent phospholipase A2-gamma  | BM-043  | Q9NP80   | 88.476 | 9.78E-04  | 2.69E+07 | 7.36E+04 | 2.25E+04 | 9.95E+04 |
| Superoxide dismutase [Cu-Zn]                | SOD1    | P00441   | 15.936 | 3.28E-22  | 2.67E+07 | 7.65E+04 | 2.76E+04 | 8.35E+04 |
| Basic fibroblast growth factor receptor 1   | FGFR    | P11362-2 | 91.667 | 3.13E-09  | 2.66E+07 | 1.47E+05 | 3.38E+04 | 5.85E+04 |
| Collagen alpha-1(XIV) chain                 | COL14A1 | Q05707   | 193.51 | 2.27E-57  | 2.65E+07 | 1.07E+05 | 1.68E+05 | 2.18E+05 |
| Ras-related protein Rab-14                  | RAB14   | P61106   | 23.897 | 1.13E-14  | 2.65E+07 | 1.09E+05 | 1.20E+05 | 1.12E+05 |
| Interleukin-1 receptor 3                    | C3orf13 | Q9NPH3-5 | 78.602 | 8.24E-16  | 2.64E+07 | 1.60E+05 | 5.05E+04 | 8.37E+04 |
| Inositol 1,3,4-trisphosphate 5/6-kinase     | ITPK1   | Q13572   | 45.621 | 1.89E-03  | 2.63E+07 | 6.57E+04 | 4.82E+04 | 0.00E+00 |
| Beta-hexosaminidase subunit beta            | HCC7    | P07686   | 63.111 | 1.33E-15  | 2.58E+07 | 4.62E+04 | 1.12E+05 | 7.21E+04 |
| Kin of irregular chiasm-like protein 1      | KIRREL  | Q96J84-2 | 85.048 | 1.15E-47  | 2.57E+07 | 6.99E+04 | 1.02E+05 | 1.26E+05 |
| Uncharacterized protein C6orf72             | C6orf72 | Q9NU53   | 36.84  | 3.57E-13  | 2.51E+07 | 1.08E+05 | 9.04E+04 | 5.64E+04 |
| Acyl-CoA-binding protein                    | DBI     | P07108   | 10.044 | 1.80E-58  | 2.50E+07 | 1.10E+05 | 1.80E+05 | 1.57E+05 |
| Cell proliferation-inducing gene 35 protein | PEDF    | P36955   | 46.312 | 1.21E-116 | 2.50E+07 | 5.77E+04 | 1.01E+05 | 6.69E+04 |
| Canstatin                                   | COL4A2  | E7EPD1   | 168.04 | 1.46E-13  | 2.49E+07 | 8.22E+04 | 7.44E+04 | 1.14E+05 |
| Hyaluronidase-1                             | HYAL1   | Q12794   | 48.368 | 3.48E-26  | 2.48E+07 | 1.33E+05 | 9.71E+04 | 4.33E+04 |

|                                            |          |           |        |           |          |          |          |          |
|--------------------------------------------|----------|-----------|--------|-----------|----------|----------|----------|----------|
| 14.5 kDa translational inhibitor protein   | HRSP12   | P52758    | 14.494 | 2.49E-31  | 2.47E+07 | 1.50E+05 | 8.62E+04 | 5.18E+04 |
| CCB peptide                                | CHGB     | P05060    | 78.275 | 4.21E-09  | 2.46E+07 | 8.35E+04 | 8.27E+04 | 5.73E+04 |
| Ig heavy chain V-III region WEA            |          | P01763    | 12.141 | 3.72E-36  | 2.46E+07 | 1.16E+05 | 1.20E+05 | 8.02E+04 |
| EF-hand domain-containing protein KIAA0494 | KIAA0494 | O75071    | 55.031 | 1.09E-14  | 2.45E+07 | 1.12E+05 | 8.52E+04 | 7.22E+04 |
| Actin, cytoplasmic 2                       | ACTB     | P63261    | 41.792 | 0.00E+00  | 2.42E+07 | 7.58E+04 | 1.47E+05 | 1.44E+05 |
| AL-11                                      | CHGA     | P10645    | 50.688 | 8.69E-12  | 2.42E+07 | 5.31E+04 | 2.57E+04 | 3.13E+04 |
| Natural killer cell-enhancing factor A     | PAGA     | Q06830    | 22.11  | 2.70E-17  | 2.40E+07 | 1.30E+05 | 1.10E+05 | 2.31E+04 |
| Cytovillin                                 | EZR      | P15311    | 69.412 | 2.86E-28  | 2.38E+07 | 1.36E+05 | 7.72E+04 | 8.27E+04 |
| CALNUC                                     | NUC      | Q02818    | 53.879 | 7.67E-16  | 2.37E+07 | 7.11E+04 | 9.33E+04 | 5.44E+04 |
| Ig kappa chain V-III region Ti             |          | P01622    | 11.788 | 2.32E-216 | 2.32E+07 | 7.44E+04 | 6.32E+04 | 1.14E+05 |
| Deubiquitinating enzyme 16                 | MSTP039  | Q9Y5T5-3  | 91.869 | 1.00E-03  | 2.29E+07 | 4.26E+04 | 3.41E+04 | 1.70E+05 |
| Alpha-trypsin chain 1                      | PRSS1    | E7EQ64    | 28.123 | 1.29E-12  | 2.23E+07 | 4.94E+04 | 2.18E+05 | 1.11E+05 |
| Aldehyde dehydrogenase family 1 member A1  | ALDC     | P00352    | 54.861 | 3.09E-15  | 2.22E+07 | 1.12E+05 | 9.83E+04 | 4.44E+04 |
| Calgranulin-B                              | CAGB     | P06702    | 13.242 | 4.93E-08  | 2.19E+07 | 1.81E+05 | 2.04E+04 | 2.70E+04 |
|                                            |          | G3V3Y2    | 9.9002 | 0.00E+00  | 2.19E+07 | 5.97E+04 | 2.47E+04 | 8.41E+04 |
| Ig kappa chain V-IV region JI              | IGKV4-1  | P06313    | 14.632 | 5.51E-170 | 2.18E+07 | 1.06E+05 | 6.14E+04 | 5.90E+04 |
| Cadherin-6                                 | CDH6     | P55285    | 88.308 | 9.74E-18  | 2.17E+07 | 1.18E+05 | 3.74E+04 | 1.35E+05 |
| Protein FAM151A                            | C1orf179 | Q8WW52    | 64.027 | 1.85E-06  | 2.17E+07 | 7.91E+04 | 9.61E+04 | 6.41E+04 |
| 56 kDa autoantigen                         | ANX11    | P50995    | 54.389 | 6.09E-28  | 2.16E+07 | 9.62E+04 | 1.05E+05 | 1.80E+05 |
| CSC-21K                                    | TIMP2    | P16035    | 24.399 | 1.80E-24  | 2.14E+07 | 3.02E+04 | 6.60E+04 | 5.45E+04 |
| p160 ROCK-1                                | ROCK1    | Q13464    | 158.17 | 2.55E-03  | 2.14E+07 | 7.29E+03 | 0.00E+00 | 0.00E+00 |
| ADAMTS-like protein 4                      | ADAMTSL4 | F8WAD0    | 118.82 | 2.98E-10  | 2.12E+07 | 4.69E+04 | 8.80E+04 | 6.35E+04 |
| Carom                                      | FCHSD2   | E9PG19    | 86.813 | 2.27E-04  | 2.11E+07 | 1.10E+05 | 1.11E+05 | 1.31E+05 |
| MOCO1-A                                    | MOCO1    | O96033    | 9.7552 | 7.14E-09  | 2.09E+07 | 8.15E+04 | 1.07E+05 | 3.30E+04 |
| Fibroblast growth factor receptor 2        | BEK      | P21802-11 | 92.732 | 1.53E-15  | 2.08E+07 | 6.43E+04 | 1.12E+05 | 3.02E+04 |
| 14 kDa phosphohistidine phosphatase        | CGI-202  | Q9NRX4    | 13.832 | 3.41E-25  | 2.04E+07 | 4.76E+04 | 7.98E+04 | 1.05E+05 |
| Histidine-proline-rich glycoprotein        | HRG      | P04196    | 59.578 | 1.04E-84  | 2.02E+07 | 6.47E+04 | 6.20E+04 | 5.74E+04 |
| Complement factor H                        | CFH      | P08603    | 139.09 | 5.38E-86  | 2.01E+07 | 4.80E+04 | 4.46E+04 | 1.27E+05 |
| Glutathione S-transferase Mu 3             | GST5     | P21266    | 26.559 | 1.75E-25  | 2.00E+07 | 8.94E+04 | 5.84E+04 | 1.87E+04 |
| Erythroid-potentiating activity            | CLGI     | P01033    | 23.171 | 3.70E-32  | 2.00E+07 | 8.14E+04 | 4.56E+04 | 2.95E+04 |
| Ig heavy chain V-I region V35              |          | P23083    | 13.009 | 1.06E-05  | 1.94E+07 | 8.38E+04 | 2.21E+04 | 1.65E+04 |
| Glutaredoxin-1                             | GLRX     | P35754    | 11.776 | 4.33E-11  | 1.94E+07 | 6.12E+04 | 6.14E+04 | 3.88E+04 |
| Hemofiltrate peptide HF6478                | SPINK5   | Q9NQ38-3  | 124.08 | 1.79E-15  | 1.93E+07 | 8.91E+04 | 0.00E+00 | 2.29E+04 |
| 67 kDa cytokeratin                         | KRT1     | P04264    | 66.017 | 1.13E-178 | 1.93E+07 | 0.00E+00 | 1.94E+05 | 2.36E+05 |

|                                                                 |          |          |        |           |          |          |          |          |
|-----------------------------------------------------------------|----------|----------|--------|-----------|----------|----------|----------|----------|
| RAR-responsive protein TIG1                                     | RARRES1  | P49788   | 33.285 | 2.29E-28  | 1.92E+07 | 1.25E+05 | 2.34E+04 | 7.85E+03 |
| Cholesteryl ester transfer protein                              | CETP     | P11597   | 54.756 | 4.42E-20  | 1.90E+07 | 2.48E+04 | 0.00E+00 | 4.56E+04 |
| Glypican-1                                                      | GPC1     | P35052   | 61.68  | 2.87E-25  | 1.85E+07 | 7.26E+04 | 5.66E+04 | 3.15E+04 |
| Cadherin-related family member 5                                | CDHR5    | Q9HBB8   | 88.222 | 9.05E-66  | 1.82E+07 | 4.28E+04 | 1.42E+05 | 8.70E+04 |
| Apolipoprotein M                                                | APOM     | O95445   | 21.253 | 1.49E-06  | 1.81E+07 | 7.18E+04 | 6.11E+04 | 3.87E+04 |
| Cyclophilin B                                                   | CYPB     | P23284   | 23.742 | 3.49E-16  | 1.79E+07 | 8.66E+04 | 5.58E+04 | 4.85E+03 |
| 4F2 cell-surface antigen heavy chain                            | MDU1     | P08195-4 | 71.122 | 4.45E-29  | 1.75E+07 | 6.75E+04 | 6.29E+04 | 3.63E+04 |
| Glutathione S-transferase A2                                    | GST2     | P09210   | 25.664 | 1.44E-18  | 1.74E+07 | 9.05E+04 | 1.08E+05 | 2.80E+04 |
| Uncharacterized protein C10orf47                                | C10orf47 | Q86WR7   | 45.801 | 5.88E-04  | 1.74E+07 | 6.69E+04 | 8.04E+04 | 2.07E+04 |
| Epidermal growth factor-like protein 4                          | C19orf49 | Q7Z7M0   | 303.1  | 3.25E-23  | 1.72E+07 | 4.73E+04 | 1.14E+05 | 6.34E+04 |
| CD209 antigen                                                   | CD209    | Q9NNX6   | 45.774 | 1.15E-100 | 1.70E+07 | 7.59E+04 | 2.64E+04 | 4.83E+04 |
| Lymphocyte antigen 6H                                           | LY6H     | O94772   | 14.669 | 5.43E-09  | 1.66E+07 | 7.30E+04 | 5.67E+04 | 9.90E+04 |
| Cytokeratin-10                                                  | KPP      | P13645   | 59.51  | 6.40E-79  | 1.66E+07 | 0.00E+00 | 1.12E+05 | 2.93E+05 |
| Atriopeptidase                                                  | EPN      | P08473   | 85.513 | 4.26E-37  | 1.63E+07 | 6.10E+04 | 9.31E+04 | 7.75E+04 |
| CD62 antigen-like family member L                               | LNHR     | P14151   | 42.187 | 6.41E-29  | 1.62E+07 | 3.66E+04 | 6.02E+03 | 4.07E+04 |
| Frizzled protein, human endometrium                             | FRPHE    | Q6FHJ7   | 39.826 | 5.39E-14  | 1.57E+07 | 2.64E+04 | 5.82E+04 | 7.00E+04 |
| Histone H1.4                                                    | H1F4     | P10412   | 21.865 | 4.03E-16  | 1.56E+07 | 1.53E+04 | 1.91E+04 | 2.35E+04 |
| Alpha-2-macroglobulin                                           | A2M      | P01023   | 163.29 | 1.94E-39  | 1.53E+07 | 2.36E+04 | 1.46E+05 | 6.53E+04 |
| cDNA FLJ54854, highly similar to Junctional adhesion molecule A | F11R     | B7Z5W1   | 32.858 | 9.28E-06  | 1.53E+07 | 1.05E+04 | 3.13E+04 | 3.03E+04 |
| CD177 antigen                                                   | CD177    | Q8N6Q3   | 46.363 | 1.23E-08  | 1.52E+07 | 2.07E+04 | 5.95E+04 | 8.55E+04 |
| Laminin subunit alpha-4                                         | LAMA4    | Q16363   | 202.52 | 1.85E-08  | 1.48E+07 | 5.31E+04 | 3.84E+04 | 6.48E+04 |
| EPH-related receptor tyrosine kinase ligand 1                   | EFNA1    | P20827   | 23.787 | 6.95E-10  | 1.47E+07 | 3.21E+04 | 4.65E+04 | 4.02E+04 |
| Putative uncharacterized protein BST1                           | BST1     | A6NC48   | 37.482 | 1.27E-10  | 1.47E+07 | 7.76E+04 | 8.20E+03 | 1.06E+04 |
| BLAST-2                                                         | CD23A    | P06734   | 36.468 | 2.84E-15  | 1.46E+07 | 2.49E+04 | 1.92E+04 | 4.69E+04 |
| Carbonate dehydratase I                                         | CA1      | P00915   | 28.87  | 2.90E-28  | 1.46E+07 | 1.43E+05 | 2.02E+04 | 7.96E+04 |
| Semenogelin II                                                  | SEMG2    | Q02383   | 65.444 | 2.65E-35  | 1.46E+07 | 0.00E+00 | 6.13E+04 | 1.46E+05 |
| EPH-like kinase 2                                               | EPHB3    | P54753   | 110.33 | 1.62E-19  | 1.45E+07 | 7.13E+04 | 7.39E+04 | 5.28E+04 |
| Putative uncharacterized protein C16orf89                       | C16orf89 | C9JNB3   | 48.819 | 1.01E-29  | 1.42E+07 | 3.15E+04 | 3.42E+04 | 5.90E+04 |
| Putative uncharacterized protein FGG                            | FGG      | C9JC84   | 52.337 | 3.59E-130 | 1.39E+07 | 0.00E+00 | 0.00E+00 | 7.97E+03 |
| CD300 antigen-like family member F                              | CD300F   | E7EME0   | 33.797 | 2.12E-34  | 1.38E+07 | 8.02E+04 | 2.98E+04 | 7.05E+04 |
| Neuroserpin                                                     | PII2     | Q99574   | 46.426 | 1.31E-15  | 1.37E+07 | 5.67E+04 | 9.82E+04 | 4.42E+04 |

|                                                                              |          |          |        |          |          |          |          |          |
|------------------------------------------------------------------------------|----------|----------|--------|----------|----------|----------|----------|----------|
| Receptor-type tyrosine-protein phosphatase S                                 | PTPRS    | E9PDC5   | 217.23 | 5.87E-12 | 1.35E+07 | 8.58E+04 | 7.50E+04 | 4.83E+04 |
| Coactosin-like protein                                                       | CLP      | Q14019   | 15.945 | 1.71E-19 | 1.31E+07 | 3.68E+04 | 5.50E+04 | 1.41E+04 |
| Cytokine receptor class-II member 4                                          | CRFB4    | Q08334   | 36.995 | 6.22E-13 | 1.29E+07 | 1.88E+04 | 3.00E+04 | 4.80E+04 |
| 230 kDa bullous pemphigoid antigen                                           | BPAG1    | E9PEB9   | 880.55 | 1.25E-03 | 1.29E+07 | 2.73E+04 | 1.55E+04 | 4.59E+04 |
|                                                                              |          | F8VX91   | 12.491 | 4.99E-45 | 1.28E+07 | 3.04E+04 | 4.56E+03 | 2.58E+04 |
| Phosphatidylinositol-4-phosphate 3-kinase C2 domain-containing subunit alpha | PIK3C2A  | O00443   | 190.68 | 3.73E-05 | 1.27E+07 | 0.00E+00 | 0.00E+00 | 4.99E+04 |
| Endoplasmic reticulum resident protein 46                                    | TLP46    | Q8NBS9   | 47.628 | 8.59E-12 | 1.24E+07 | 3.67E+04 | 5.28E+04 | 3.13E+04 |
| Frizzled-7                                                                   | FZD7     | O75084   | 63.619 | 4.62E-05 | 1.23E+07 | 3.99E+04 | 4.25E+04 | 2.05E+04 |
| Multiple epidermal growth factor-like domains protein 5                      | KIAA0814 | O75094   | 167.71 | 2.33E-03 | 1.22E+07 | 0.00E+00 | 0.00E+00 | 3.50E+04 |
| ALG-2-interacting protein 1                                                  | AIP1     | E9PFU1   | 96.771 | 6.21E-65 | 1.22E+07 | 3.67E+04 | 8.67E+04 | 1.03E+05 |
| Connectin                                                                    | TTN      | Q8WZ42-8 | 3829.8 | 7.26E-14 | 1.22E+07 | 4.66E+04 | 4.78E+04 | 8.97E+04 |
|                                                                              |          | E7ETN3   | 124.02 | 4.70E-99 | 1.21E+07 | 5.47E+03 | 1.83E+04 | 1.05E+05 |
| 18 kDa cationic antimicrobial protein                                        | CAMP     | P49913   | 19.301 | 6.49E-08 | 1.19E+07 | 2.27E+04 | 6.85E+04 | 8.05E+04 |
| Fibrinogen beta chain                                                        | FGB      | P02675   | 55.928 | 8.78E-90 | 1.16E+07 | 0.00E+00 | 0.00E+00 | 0.00E+00 |
| Inter-alpha-trypsin inhibitor complex component II                           | IGHEP2   | P19823   | 106.46 | 3.99E-33 | 1.14E+07 | 0.00E+00 | 1.91E+04 | 0.00E+00 |
| Interleukin-25                                                               | C19orf10 | Q969H8   | 18.795 | 2.01E-15 | 1.12E+07 | 8.33E+04 | 2.39E+04 | 4.31E+04 |
| GTP cyclohydrolase 1 feedback regulatory protein                             | GCHFR    | P30047   | 9.6981 | 2.24E-06 | 1.12E+07 | 2.89E+04 | 7.46E+04 | 3.64E+04 |
| DNA polymerase-transactivated protein 2                                      | DNAPT2   | Q8NC42   | 43.164 | 4.47E-08 | 1.09E+07 | 1.43E+04 | 2.02E+04 | 2.23E+04 |
| BMP and activin membrane-bound inhibitor homolog                             | BAMBI    | Q13145   | 29.107 | 1.92E-14 | 1.09E+07 | 0.00E+00 | 4.25E+04 | 2.82E+04 |
| RING finger protein 13                                                       | RNF13    | O43567   | 42.813 | 1.10E-05 | 1.09E+07 | 4.39E+04 | 1.64E+04 | 5.75E+04 |
| Leu-enkephalin                                                               | PENK     | P01210   | 30.787 | 2.50E-30 | 1.07E+07 | 8.68E+04 | 1.96E+04 | 2.93E+04 |
| 7,8-dihydro-8-oxoguanine triphosphatase                                      | MTH1     | P36639   | 22.519 | 3.21E-07 | 1.06E+07 | 5.71E+04 | 2.92E+04 | 2.32E+04 |
| 1-Cys peroxiredoxin                                                          | AOP2     | P30041   | 25.035 | 3.68E-11 | 1.04E+07 | 7.32E+04 | 7.86E+03 | 0.00E+00 |
| Growth/differentiation factor 15                                             | GDF15    | Q99988   | 34.14  | 3.41E-13 | 1.03E+07 | 4.59E+04 | 4.92E+04 | 8.77E+03 |
| Metallothionein-0                                                            | MT1H     | P80294   | 6.0393 | 1.43E-12 | 1.03E+07 | 6.20E+03 | 5.64E+04 | 2.87E+04 |
| N-sulphoglucosamine sulphohydrolase                                          | HSS      | P51688   | 56.695 | 2.98E-19 | 1.02E+07 | 1.51E+04 | 0.00E+00 | 8.54E+04 |
| Collagen alpha-1(XVIII) chain                                                | COL18A1  | F5GZA2   | 178.19 | 3.34E-31 | 1.01E+07 | 1.28E+04 | 2.63E+04 | 2.96E+04 |

|                                                                          |          |          |        |          |          |          |          |          |
|--------------------------------------------------------------------------|----------|----------|--------|----------|----------|----------|----------|----------|
| Cytokeratin-28                                                           | KRT25D   | Q7Z3Y7   | 53.025 | 1.56E-08 | 9.95E+06 | 0.00E+00 | 0.00E+00 | 1.07E+05 |
| Alcohol dehydrogenase [NADP+]                                            | AKR1A1   | P14550   | 36.573 | 4.39E-16 | 9.87E+06 | 2.38E+04 | 7.75E+04 | 3.41E+04 |
| Chondrolectin                                                            | C21orf68 | Q9H9P2   | 30.43  | 6.12E-12 | 9.72E+06 | 2.75E+04 | 0.00E+00 | 2.84E+04 |
| Collectrin                                                               | TMEM27   | Q9HBJ8   | 25.235 | 1.70E-11 | 9.68E+06 | 4.03E+04 | 2.07E+04 | 3.68E+04 |
| Cytokine-like protein 2-21                                               | C21orf11 | P58499-2 | 30.383 | 1.46E-18 | 9.59E+06 | 2.07E+04 | 1.37E+04 | 0.00E+00 |
| Ig kappa chain V-I region Ka                                             |          | P01603   | 11.285 | 3.39E-04 | 9.37E+06 | 1.14E+04 | 4.79E+04 | 2.95E+04 |
| Leukocyte-associated immunoglobulin-like receptor 2                      | CD306    | Q6ISS4   | 16.28  | 5.07E-20 | 9.37E+06 | 2.04E+04 | 3.30E+04 | 0.00E+00 |
| Junctional sarcoplasmic reticulum protein 1                              | JP45     | Q96MG2   | 36.318 | 5.89E-04 | 8.96E+06 | 3.62E+04 | 8.08E+03 | 4.99E+03 |
| Signal peptide, CUB domain, EGF-like 1                                   | SCUBE1   | B1AH90   | 37.306 | 4.48E-16 | 8.92E+06 | 5.33E+04 | 5.67E+04 | 6.76E+03 |
| CD167 antigen-like family member A                                       | CAK      | Q08345-5 | 101.8  | 1.26E-09 | 8.91E+06 | 2.83E+04 | 2.68E+04 | 2.09E+03 |
| Glycerol-3-phosphate dehydrogenase [NAD+], cytoplasmic                   | GPD1     | P21695   | 37.567 | 1.73E-30 | 8.76E+06 | 4.87E+04 | 3.25E+04 | 1.59E+04 |
| Cyclic AMP-responsive element-binding protein 3-like protein 3           | CREB3L3  | Q68CJ9   | 49.077 | 8.14E-05 | 8.68E+06 | 5.66E+04 | 0.00E+00 | 0.00E+00 |
| Protein Z39Ig                                                            | CRIG     | Q9Y279   | 43.987 | 7.06E-09 | 8.68E+06 | 2.52E+04 | 3.58E+04 | 1.76E+04 |
| gp67                                                                     | CD33     | P20138   | 39.825 | 8.80E-11 | 8.64E+06 | 2.87E+04 | 2.53E+04 | 1.82E+04 |
| Cytosolic thyroid hormone-binding protein                                | OIP3     | P14618   | 57.936 | 4.22E-31 | 8.40E+06 | 1.45E+04 | 3.97E+04 | 4.46E+04 |
| Glycosylation-inhibiting factor                                          | GLIF     | P14174   | 12.476 | 1.49E-12 | 8.34E+06 | 3.98E+04 | 6.16E+04 | 2.75E+04 |
| C219-reactive peptide                                                    | KIAA0268 | Q5JRA6   | 213.7  | 2.87E-09 | 8.23E+06 | 2.35E+04 | 2.55E+04 | 3.24E+04 |
| Calgranulin-A                                                            | CAGA     | P05109   | 10.834 | 6.27E-10 | 8.22E+06 | 6.37E+04 | 2.79E+04 | 0.00E+00 |
| AXL receptor tyrosine kinase ligand                                      | AXLLG    | Q14393   | 79.676 | 1.59E-10 | 8.21E+06 | 2.83E+04 | 8.47E+03 | 8.84E+03 |
| 80K-H protein                                                            | G19P1    | E7EQZ9   | 60.192 | 8.00E-08 | 8.09E+06 | 4.83E+03 | 3.25E+04 | 1.98E+04 |
| Low-density lipoprotein receptor relative with 11 ligand-binding repeats | C11orf32 | Q92673   | 248.42 | 2.08E-16 | 8.06E+06 | 1.61E+04 | 3.98E+04 | 4.03E+04 |
| Heat shock 86 kDa                                                        | HSP90A   | P07900-2 | 98.16  | 4.55E-28 | 7.84E+06 | 1.85E+04 | 7.91E+04 | 2.01E+04 |
| Glypican-4                                                               | GPC4     | O75487   | 62.411 | 1.27E-10 | 7.80E+06 | 2.71E+04 | 8.69E+03 | 0.00E+00 |
| Ceroid-lipofuscinosis neuronal protein 5                                 | CLN5     | O75503   | 41.496 | 5.82E-06 | 7.74E+06 | 2.53E+04 | 2.59E+04 | 0.00E+00 |
| 300 kDa mannose 6-phosphate receptor                                     | IGF2R    | P11717   | 274.37 | 2.92E-12 | 7.69E+06 | 3.16E+03 | 4.57E+04 | 6.08E+04 |
| von Willebrand antigen 2                                                 | F8VWF    | P04275   | 309.26 | 4.82E-10 | 7.64E+06 | 3.41E+04 | 4.00E+04 | 3.65E+04 |
| Integral membrane protein GPR180                                         | GPR180   | Q86V85   | 49.395 | 7.40E-15 | 7.62E+06 | 2.66E+04 | 3.60E+04 | 1.77E+04 |

|                                                                     |          |          |        |          |          |          |          |          |
|---------------------------------------------------------------------|----------|----------|--------|----------|----------|----------|----------|----------|
| Aminoacylproline aminopeptidase                                     | XPNPEP2  | O43895   | 75.624 | 1.39E-20 | 7.57E+06 | 3.78E+04 | 6.15E+04 | 1.75E+04 |
| Dystrophin                                                          | DMD      | E9PDN5   | 426.02 | 1.99E-03 | 7.54E+06 | 2.93E+04 | 1.93E+04 | 3.03E+04 |
| Alpha-inhibin-31                                                    | SEMG     | P04279   | 52.13  | 4.50E-36 | 7.48E+06 | 0.00E+00 | 3.55E+04 | 6.10E+04 |
| Cancer/testis antigen 19                                            | IL13R    | P78552   | 48.759 | 1.16E-07 | 7.48E+06 | 2.10E+04 | 3.00E+03 | 3.76E+04 |
| Serine protease 10                                                  | PRSS10   | F8WES1   | 57.69  | 1.07E-10 | 7.48E+06 | 1.99E+04 | 2.20E+04 | 2.51E+04 |
| Hepcidin                                                            | HAMP     | P81172   | 9.4081 | 4.06E-05 | 7.48E+06 | 3.29E+04 | 0.00E+00 | 8.28E+03 |
| 45 kDa calcium-binding protein                                      | CAB45    | Q9BRK5   | 41.806 | 8.42E-13 | 7.43E+06 | 3.40E+04 | 1.82E+04 | 8.68E+03 |
| Inter-alpha-trypsin inhibitor complex component III                 | IGHEP1   | P19827   | 101.39 | 2.55E-46 | 7.42E+06 | 2.31E+04 | 7.09E+03 | 1.11E+04 |
| Ig kappa chain V-I region Wes                                       |          | P01611   | 11.608 | 3.18E-08 | 7.35E+06 | 5.42E+04 | 0.00E+00 | 1.46E+04 |
| Aspartate aminotransferase, cytoplasmic                             | GOT1     | P17174   | 46.247 | 2.67E-05 | 7.14E+06 | 8.66E+03 | 2.56E+04 | 1.02E+04 |
| Cadherin-19                                                         | CDH19    | Q9H159   | 87.001 | 1.99E-08 | 7.09E+06 | 2.70E+04 | 2.93E+04 | 1.27E+04 |
| Axonemal beta dynein heavy chain 3                                  | DNAH3    | Q8TD57   | 470.77 | 2.85E-03 | 6.79E+06 | 1.99E+04 | 6.27E+04 | 0.00E+00 |
| Calbindin                                                           | CAB27    | P05937   | 30.025 | 1.41E-13 | 6.75E+06 | 2.25E+04 | 5.90E+03 | 1.47E+04 |
| Cadherin-3                                                          | CDH3     | P22223   | 91.417 | 1.36E-15 | 6.70E+06 | 3.47E+04 | 1.86E+04 | 4.08E+04 |
| 78 kDa glucose-regulated protein                                    | GRP78    | P11021   | 72.332 | 2.04E-17 | 6.67E+06 | 8.61E+03 | 4.27E+04 | 2.19E+04 |
| A disintegrin and metalloproteinase domain-like protein decysin-1   | ADAMDEC1 | O15204   | 52.775 | 3.38E-06 | 6.64E+06 | 6.49E+03 | 1.84E+04 | 0.00E+00 |
| Protein S100-A7                                                     | PSOR1    | P31151   | 11.471 | 1.12E-10 | 6.62E+06 | 1.29E+04 | 5.79E+04 | 1.66E+04 |
| High-temperature requirement factor A3                              | HTRA3    | P83110   | 48.607 | 8.89E-05 | 6.49E+06 | 2.47E+04 | 1.74E+04 | 0.00E+00 |
| Aspartylglucosaminidase                                             | AGA      | P20933   | 37.208 | 3.00E-43 | 6.43E+06 | 8.26E+04 | 1.67E+03 | 4.70E+04 |
| Bactericidal/permeability-increasing protein-like 1                 | BPIL1    | Q8N4F0   | 49.172 | 3.70E-67 | 6.37E+06 | 4.07E+04 | 0.00E+00 | 0.00E+00 |
| 28 kDa heat shock protein                                           | HSP27    | P04792   | 22.782 | 6.09E-09 | 6.31E+06 | 1.80E+04 | 6.77E+04 | 2.75E+03 |
| Endothelial lectin HL-1                                             | INTL     | Q8WWA0   | 34.961 | 7.35E-17 | 6.12E+06 | 3.99E+04 | 4.07E+04 | 0.00E+00 |
| Cell migration-inducing gene 5 protein                              | MIG5     | P63000-2 | 23.467 | 4.60E-07 | 6.09E+06 | 1.76E+04 | 5.14E+04 | 3.28E+04 |
| 22 kDa pancormulin                                                  | SPRC     | Q9UBC9   | 18.154 | 5.80E-23 | 6.03E+06 | 5.32E+03 | 7.46E+04 | 0.00E+00 |
| 1-phosphatidylinositol-4,5-bisphosphate phosphodiesterase epsilon-1 | KIAA1516 | Q9P212-2 | 223.87 | 3.90E-04 | 5.99E+06 | 1.15E+04 | 1.49E+04 | 0.00E+00 |
| Histone H4                                                          | H4/A     | P62805   | 11.367 | 2.67E-28 | 5.96E+06 | 0.00E+00 | 6.60E+04 | 4.12E+04 |
| CD300 antigen-like family member E                                  | CD300E   | Q496F6   | 22.918 | 4.08E-08 | 5.91E+06 | 1.32E+04 | 3.15E+04 | 3.61E+04 |
| Heat shock 70 kDa protein 1/2                                       | HSPA1    | P08107   | 70.051 | 1.21E-17 | 5.79E+06 | 1.71E+04 | 3.61E+04 | 1.37E+04 |
| Histone H1.2                                                        | H1F2     | P16403   | 21.364 | 6.39E-12 | 5.73E+06 | 0.00E+00 | 1.12E+04 | 7.67E+03 |

|                                                          |         |          |        |           |          |          |          |          |
|----------------------------------------------------------|---------|----------|--------|-----------|----------|----------|----------|----------|
| Fibulin-7                                                | FBLN7   | Q53RD9   | 47.375 | 7.69E-05  | 5.70E+06 | 5.73E+03 | 2.52E+04 | 3.42E+03 |
| Bone sialoprotein 1                                      | BNSP    | P10451-3 | 32.355 | 0.00E+00  | 5.63E+06 | 9.31E+03 | 1.09E+04 | 1.05E+04 |
| Autotaxin                                                | ATX     | Q13822-2 | 105.2  | 2.20E-11  | 5.60E+06 | 2.66E+04 | 0.00E+00 | 2.12E+04 |
| GPI-anchored metastasis-associated protein C4.4A homolog | C4.4A   | O95274   | 35.97  | 1.36E-08  | 5.49E+06 | 1.11E+04 | 2.24E+04 | 2.93E+04 |
| Prominin-2                                               | PROM2   | Q8N271   | 91.882 | 2.51E-07  | 5.43E+06 | 1.44E+04 | 4.98E+03 | 1.89E+04 |
| Ig kappa chain V-I region Ni                             |         | P01613   | 11.745 | 3.14E-135 | 5.40E+06 | 3.54E+04 | 6.52E+03 | 1.26E+04 |
| Ezrin-radixin-moesin-binding phosphoprotein 50           | NHERF   | O14745   | 38.868 | 2.60E-08  | 5.37E+06 | 5.31E+04 | 1.06E+04 | 0.00E+00 |
| CD160 antigen                                            | BY55    | O95971   | 19.81  | 1.73E-07  | 5.36E+06 | 2.50E+03 | 9.62E+03 | 1.25E+04 |
| Layilin                                                  | LAYN    | Q6UX15   | 43.108 | 1.47E-05  | 5.30E+06 | 4.41E+03 | 5.59E+03 | 1.07E+04 |
| Profilin I                                               | PFN1    | P07737   | 15.054 | 2.10E-10  | 5.27E+06 | 1.58E+04 | 6.03E+03 | 2.73E+04 |
| Signal-regulatory protein beta-1 isoform 3               | SIRPB1  | Q5TFQ8   | 43.359 | 1.36E-57  | 5.21E+06 | 7.67E+03 | 0.00E+00 | 1.35E+04 |
| Elongation factor 1-alpha 2                              | EEF1A2  | Q05639   | 50.47  | 8.55E-06  | 5.18E+06 | 2.28E+04 | 2.07E+04 | 0.00E+00 |
| Plexin domain-containing protein 2                       | PLXDC2  | Q6UX71   | 59.582 | 1.16E-05  | 5.03E+06 | 1.36E+04 | 4.17E+03 | 9.15E+03 |
| Asialoglycoprotein receptor 2                            | ASGR2   | P07307   | 35.092 | 4.46E-04  | 4.99E+06 | 9.75E+03 | 1.40E+04 | 1.59E+04 |
| Cytosolic malate dehydrogenase                           | MDH1    | F5H098   | 38.627 | 2.02E-47  | 4.93E+06 | 1.53E+04 | 5.36E+04 | 3.00E+04 |
| G-protein coupled receptor 56                            | GPR56   | Q9Y653   | 77.737 | 6.96E-08  | 4.93E+06 | 8.79E+03 | 5.86E+03 | 5.55E+03 |
|                                                          |         | D6RAK8   | 55.076 | 0.00E+00  | 4.81E+06 | 2.80E+04 | 3.30E+04 | 5.28E+04 |
| Beta-mannosidase                                         | MANB1   | O00462   | 100.89 | 1.77E-13  | 4.80E+06 | 0.00E+00 | 2.26E+04 | 1.14E+04 |
| Cystatin-A                                               | CSTA    | P01040   | 11.006 | 1.44E-16  | 4.75E+06 | 3.52E+04 | 0.00E+00 | 6.06E+03 |
| RAR-responsive protein TIG2                              | RARRES2 | Q99969   | 18.617 | 1.07E-08  | 4.72E+06 | 2.89E+04 | 0.00E+00 | 0.00E+00 |
| CFR-1                                                    | CFR1    | Q92896-2 | 137.22 | 1.85E-51  | 4.71E+06 | 0.00E+00 | 3.74E+04 | 2.16E+04 |
| Low-density lipoprotein receptor                         | LDLR    | P01130   | 95.375 | 2.08E-04  | 4.69E+06 | 3.21E+04 | 7.29E+03 | 0.00E+00 |
| Aromatic-L-amino-acid decarboxylase                      | AADC    | P20711   | 53.926 | 2.75E-32  | 4.69E+06 | 1.94E+04 | 4.44E+04 | 5.22E+03 |
| Antigen CD42b-alpha                                      | GP1BA   | E7ES66   | 71.539 | 1.68E-07  | 4.68E+06 | 3.19E+04 | 0.00E+00 | 1.77E+04 |
| B-CK                                                     | CKB     | P12277   | 42.644 | 5.84E-05  | 4.57E+06 | 1.93E+04 | 2.10E+04 | 0.00E+00 |
| IgLON family member 3                                    | IGLON3  | F5H5G1   | 39.704 | 4.63E-18  | 4.56E+06 | 1.46E+04 | 8.31E+03 | 2.24E+04 |
| Amyloid protein homolog                                  | APLP2   | Q06481   | 86.955 | 5.71E-08  | 4.54E+06 | 0.00E+00 | 1.68E+04 | 0.00E+00 |
| Glycine hydroxymethyltransferase                         | SHMT1   | P34896   | 53.082 | 9.27E-10  | 4.50E+06 | 4.83E+03 | 5.78E+04 | 1.22E+04 |
| CD5 antigen-like                                         | API6    | O43866   | 38.087 | 1.32E-05  | 4.49E+06 | 1.28E+04 | 7.36E+03 | 1.44E+04 |
| Cadherin-16                                              | CDH16   | O75309   | 89.922 | 6.87E-05  | 4.45E+06 | 1.24E+04 | 0.00E+00 | 5.54E+03 |
| Putative uncharacterized protein MEGF9                   | MEGF9   | C9J1K8   | 67.312 | 4.47E-06  | 4.41E+06 | 6.40E+03 | 2.92E+04 | 3.75E+04 |
| NSFL1 cofactor p47                                       | NSFL1C  | Q9UNZ2-5 | 40.816 | 7.40E-17  | 4.30E+06 | 1.67E+04 | 3.46E+04 | 0.00E+00 |

|                                                                  |          |          |        |           |          |          |          |          |
|------------------------------------------------------------------|----------|----------|--------|-----------|----------|----------|----------|----------|
| Putative uncharacterized protein CFHR4                           | CFHR4    | C9J7J7   | 65.221 | 1.55E-05  | 4.26E+06 | 3.56E+04 | 0.00E+00 | 2.33E+04 |
| Chondroitin sulfate proteoglycan core protein 2                  | CSPG2    | P13611   | 372.82 | 2.02E-14  | 4.22E+06 | 1.62E+04 | 4.09E+04 | 2.73E+04 |
| Alpha-L-fucosidase I                                             | FUCA1    | P04066   | 53.688 | 4.17E-09  | 4.15E+06 | 3.72E+04 | 1.87E+04 | 5.59E+03 |
| Laminin B1 chain                                                 | LAMB1    | G3XAI2   | 200.48 | 6.55E-13  | 4.14E+06 | 7.10E+03 | 5.40E+03 | 6.04E+03 |
| 3-hydroxybutyrate dehydrogenase type 2                           | BDH2     | Q9BUT1   | 26.724 | 9.63E-43  | 4.09E+06 | 8.10E+03 | 4.06E+04 | 1.74E+04 |
| ATL-derived factor                                               | TRDX     | P10599   | 11.737 | 7.45E-04  | 3.99E+06 | 2.02E+04 | 0.00E+00 | 0.00E+00 |
| CD85 antigen-like family member K                                | ILT3     | Q8NHJ6-3 | 49.396 | 3.84E-04  | 3.92E+06 | 9.50E+03 | 1.29E+04 | 0.00E+00 |
| Placental ribonuclease inhibitor                                 | PRI      | P13489   | 49.973 | 2.83E-09  | 3.91E+06 | 7.64E+03 | 3.05E+04 | 0.00E+00 |
| Hemoglobin scavenger receptor                                    | CD163    | Q86VB7-2 | 125.98 | 2.68E-06  | 3.82E+06 | 0.00E+00 | 8.99E+03 | 5.78E+03 |
| Palmitoyl-protein hydrolase 1                                    | PPT      | E9PES1   | 37.131 | 1.79E-05  | 3.71E+06 | 1.40E+04 | 1.71E+04 | 0.00E+00 |
| 18 kDa phosphoprotein                                            | CFL      | E9PK25   | 22.728 | 9.26E-10  | 3.66E+06 | 1.84E+04 | 4.57E+03 | 0.00E+00 |
| Aldehyde reductase                                               | AKR1B1   | P15121   | 35.853 | 7.84E-04  | 3.65E+06 | 0.00E+00 | 7.60E+04 | 0.00E+00 |
| 56 kDa selenium-binding protein                                  | SBP      | Q13228   | 52.39  | 1.81E-13  | 3.64E+06 | 1.35E+04 | 2.73E+04 | 0.00E+00 |
| Argininosuccinate synthase                                       | ASS      | P00966   | 46.53  | 3.11E-10  | 3.63E+06 | 7.01E+03 | 2.01E+04 | 1.79E+04 |
| Matrilysin                                                       | MMP7     | P09237   | 29.676 | 7.13E-05  | 3.53E+06 | 1.19E+04 | 2.13E+04 | 3.15E+04 |
| Dopamine-responsive gene 1 protein                               | C6orf55  | Q9NP79   | 33.879 | 2.65E-06  | 3.52E+06 | 1.55E+03 | 5.78E+04 | 1.25E+04 |
| Nicotinate-nucleotide pyrophosphorylase [carboxylating]          | QPRT     | Q15274   | 30.845 | 4.96E-08  | 3.47E+06 | 1.37E+04 | 2.36E+04 | 0.00E+00 |
| Ig kappa chain V-I region Hau                                    |          | P01600   | 11.671 | 6.89E-218 | 3.46E+06 | 1.43E+04 | 3.71E+04 | 5.17E+03 |
| Ester hydrolase C11orf54                                         | C11orf54 | Q9H0W9   | 35.117 | 5.36E-07  | 3.45E+06 | 1.10E+04 | 3.36E+04 | 0.00E+00 |
| Bumetanide-sensitive sodium-(potassium)-chloride cotransporter 2 | NKCC2    | E9PDW4   | 121.39 | 1.21E-10  | 3.39E+06 | 1.00E+04 | 2.85E+04 | 0.00E+00 |
| Chloride channel ABP                                             | CLIC1    | O00299   | 26.922 | 2.75E-07  | 3.38E+06 | 2.16E+04 | 1.19E+04 | 2.64E+03 |
|                                                                  |          | G3V1N2   | 11.948 | 1.87E-10  | 3.26E+06 | 1.65E+04 | 1.06E+04 | 0.00E+00 |
| Actin regulatory protein CAP-G                                   | AFCP     | P40121   | 38.498 | 2.86E-09  | 3.21E+06 | 1.87E+03 | 2.50E+04 | 2.54E+04 |
| Ig kappa chain V-II region FR                                    |          | P01615   | 12.059 | 5.61E-04  | 3.15E+06 | 0.00E+00 | 6.59E+04 | 0.00E+00 |
| Sodium pump subunit alpha-1                                      | ATP1A1   | F5H3A1   | 113    | 2.24E-03  | 3.14E+06 | 6.26E+03 | 4.01E+03 | 6.36E+03 |
| C-X-C motif chemokine 12                                         | CXCL12   | P48061-4 | 15.495 | 1.22E-04  | 3.12E+06 | 7.56E+03 | 8.00E+03 | 0.00E+00 |
| ECM3 homolog                                                     | FREM2    | Q5SZK8   | 351.15 | 3.81E-10  | 3.12E+06 | 3.84E+03 | 2.65E+03 | 4.28E+03 |
| Heparin cofactor 2                                               | HCF2     | P05546   | 57.07  | 1.75E-10  | 3.10E+06 | 0.00E+00 | 0.00E+00 | 0.00E+00 |
| BH3-interacting domain death agonist                             | BID      | P55957-2 | 26.836 | 2.51E-14  | 3.07E+06 | 0.00E+00 | 8.02E+03 | 2.32E+03 |



|                                                                        |          |          |        |           |          |          |          |          |
|------------------------------------------------------------------------|----------|----------|--------|-----------|----------|----------|----------|----------|
| Ig kappa chain V-I region Roy                                          |          | P01608   | 11.782 | 3.37E-217 | 3.05E+06 | 1.66E+04 | 0.00E+00 | 0.00E+00 |
| DRT                                                                    | DRT      | P29323   | 117.49 | 1.05E-11  | 3.01E+06 | 3.04E+03 | 2.81E+04 | 1.33E+04 |
| Anionic trypsinogen                                                    | PRSS2    | P07478   | 26.487 | 1.92E-16  | 2.99E+06 | 0.00E+00 | 0.00E+00 | 2.56E+03 |
| Voltage-dependent calcium channel subunit alpha-2/delta-1              | CACNA2D1 | F8WC36   | 125.39 | 8.22E-07  | 2.96E+06 | 1.15E+03 | 6.79E+03 | 7.74E+03 |
| Adipocyte adhesion molecule                                            | ACAM     | Q9H6B4   | 41.28  | 3.60E-04  | 2.94E+06 | 0.00E+00 | 0.00E+00 | 3.10E+04 |
| C-type lectin domain family 5 member A                                 | CLEC5A   | Q9NY25   | 21.521 | 6.49E-05  | 2.94E+06 | 9.55E+03 | 2.44E+04 | 1.38E+04 |
| Histone H1.5                                                           | H1F5     | P16401   | 22.58  | 4.29E-07  | 2.93E+06 | 0.00E+00 | 0.00E+00 | 5.10E+03 |
| Cytokeratin-13                                                         | KRT13    | P13646-3 | 45.867 | 3.07E-18  | 2.92E+06 | 0.00E+00 | 1.15E+04 | 0.00E+00 |
| Imidodipeptidase                                                       | PEPD     | P12955   | 54.548 | 1.43E-07  | 2.85E+06 | 3.85E+03 | 5.84E+03 | 0.00E+00 |
| Insulin-like growth factor-binding protein complex acid labile subunit | ALS      | E9PGU3   | 70.235 | 2.28E-11  | 2.82E+06 | 6.07E+03 | 4.21E+03 | 8.44E+03 |
| Sodium-dependent neutral amino acid transporter B(0)AT1                | SLC6A19  | Q695T7   | 71.109 | 3.71E-04  | 2.76E+06 | 2.92E+04 | 0.00E+00 | 0.00E+00 |
| Charged multivesicular body protein 5                                  | C9orf83  | Q9NZZ3   | 24.57  | 4.32E-07  | 2.71E+06 | 4.75E+03 | 3.17E+04 | 0.00E+00 |
| Protein jagged-1                                                       | JAG1     | P78504   | 133.8  | 6.07E-06  | 2.71E+06 | 2.91E+03 | 0.00E+00 | 4.02E+03 |
| Fibrinolyase                                                           | TGM4     | P49221   | 77.144 | 4.26E-11  | 2.69E+06 | 0.00E+00 | 4.47E+04 | 0.00E+00 |
|                                                                        |          | F8WDK9   | 10.848 | 1.20E-03  | 2.68E+06 | 1.70E+04 | 4.05E+03 | 0.00E+00 |
| Angiotensin-converting enzyme                                          | ACE      | P12821   | 149.71 | 7.41E-08  | 2.66E+06 | 0.00E+00 | 3.51E+04 | 1.12E+04 |
| Ig heavy chain V-III region TUR                                        |          | P01779   | 12.188 | 1.88E-222 | 2.65E+06 | 1.22E+04 | 4.42E+03 | 3.03E+03 |
| Hair keratin, type I Ha1                                               | Hka1     | A2A5Y0   | 53.728 | 1.98E-07  | 2.65E+06 | 0.00E+00 | 2.39E+04 | 0.00E+00 |
| 1,4-beta-N-acetylmuramidase C                                          | LYZ      | P61626   | 16.537 | 5.51E-06  | 2.61E+06 | 0.00E+00 | 5.64E+03 | 0.00E+00 |
| Charged multivesicular body protein 2a                                 | BC2      | O43633   | 25.104 | 2.27E-12  | 2.57E+06 | 4.48E+03 | 1.31E+04 | 0.00E+00 |
| Cytokeratin-9                                                          | KRT9     | P35527   | 62.129 | 2.57E-05  | 2.53E+06 | 0.00E+00 | 6.28E+04 | 0.00E+00 |
| Collagen alpha-3(V) chain                                              | COL5A3   | P25940   | 172.12 | 8.16E-07  | 2.53E+06 | 9.21E+03 | 0.00E+00 | 2.65E+04 |
| Leucine-rich repeat neuronal protein 4                                 | C20orf75 | Q8WUT4   | 78.842 | 1.22E-05  | 2.52E+06 | 1.24E+03 | 1.51E+04 | 0.00E+00 |
| NRH dehydrogenase [quinone] 2                                          | NMOR2    | P16083   | 25.918 | 3.12E-06  | 2.51E+06 | 3.24E+03 | 3.99E+04 | 0.00E+00 |
| 15-hydroxyprostaglandin dehydrogenase [NADP+]                          | CBR      | P16152   | 30.375 | 2.72E-10  | 2.51E+06 | 0.00E+00 | 2.66E+04 | 0.00E+00 |
| CDw113                                                                 | PRR3     | Q9NQS3   | 61.002 | 6.30E-04  | 2.50E+06 | 0.00E+00 | 1.85E+04 | 2.29E+03 |
| Desmuslin                                                              | DMN      | O15061   | 172.77 | 6.82E-04  | 2.49E+06 | 0.00E+00 | 0.00E+00 | 4.58E+03 |
| Complement component C9                                                | C9       | P02748   | 63.173 | 3.57E-07  | 2.45E+06 | 0.00E+00 | 9.65E+03 | 1.47E+04 |
| Endoglin                                                               | END      | P17813   | 70.577 | 1.19E-05  | 2.41E+06 | 1.82E+03 | 0.00E+00 | 1.15E+04 |
| Caspase-14                                                             | CASP14   | P31944   | 27.679 | 6.70E-09  | 2.40E+06 | 0.00E+00 | 1.79E+04 | 1.48E+04 |

|                                                                         |           |          |        |           |          |          |          |          |
|-------------------------------------------------------------------------|-----------|----------|--------|-----------|----------|----------|----------|----------|
| C-type lectin domain family 13 member E                                 | CLEC13E   | Q9UBG0   | 166.67 | 6.61E-26  | 2.40E+06 | 0.00E+00 | 0.00E+00 | 0.00E+00 |
| Carcinoembryonic antigen                                                | CEA       | P06731   | 76.794 | 5.39E-11  | 2.33E+06 | 4.74E+03 | 1.45E+04 | 2.75E+04 |
| 50 kDa dynein-associated polypeptide                                    | DCTN2     | F5H2S7   | 44.809 | 6.91E-04  | 2.29E+06 | 1.63E+04 | 1.22E+04 | 0.00E+00 |
| Fc-gamma RIIB-beta                                                      | CD16B     | O75015   | 26.216 | 1.06E-36  | 2.27E+06 | 2.86E+03 | 1.36E+04 | 2.74E+02 |
| 14 kDa thioredoxin-related protein                                      | TXNDC17   | Q9BRA2   | 13.941 | 9.22E-06  | 2.27E+06 | 0.00E+00 | 2.47E+04 | 8.56E+03 |
| Natural killer cell-enhancing factor B                                  | NKEFB     | P32119   | 21.892 | 3.74E-07  | 2.19E+06 | 3.73E+03 | 1.06E+04 | 1.12E+04 |
| Neural cell adhesion molecule 2                                         | NCAM2     | O15394   | 93.045 | 1.04E-05  | 2.17E+06 | 4.55E+03 | 0.00E+00 | 3.93E+03 |
| Apyrase homolog                                                         | CANT1     | Q8WVQ1   | 44.839 | 3.35E-08  | 2.16E+06 | 6.00E+03 | 1.26E+04 | 0.00E+00 |
|                                                                         |           | Q2KIS7   | 22.144 | 1.72E-146 | 2.14E+06 | 5.00E+03 | 0.00E+00 | 4.80E+03 |
| Cytochrome c-releasing factor 21                                        | C7orf24   | O75223   | 21.007 | 9.41E-10  | 2.11E+06 | 0.00E+00 | 1.07E+04 | 0.00E+00 |
| cDNA FLJ51269, highly similar to Aminopeptidase N (EC 3.4.11.2)         |           | B4DP96   | 55.976 | 4.10E-171 | 2.10E+06 | 8.65E+03 | 1.25E+04 | 0.00E+00 |
| Fibronectin-like domain-containing leucine-rich transmembrane protein 2 | FLRT2     | O43155   | 74.048 | 1.41E-03  | 2.04E+06 | 1.14E+04 | 7.87E+03 | 0.00E+00 |
| Elafin                                                                  | PI3       | P19957   | 12.269 | 1.96E-07  | 2.02E+06 | 4.53E+03 | 2.36E+04 | 3.83E+03 |
| 9.5S alpha-1-glycoprotein                                               | APCS      | P02743   | 25.387 | 2.47E-08  | 2.00E+06 | 0.00E+00 | 5.68E+04 | 0.00E+00 |
| Cell proliferation-inducing gene 46 protein                             | CYK18     | P05783   | 48.057 | 1.30E-07  | 1.92E+06 | 0.00E+00 | 2.20E+04 | 0.00E+00 |
| Neural cell adhesion molecule L1                                        | CAML1     | F5H025   | 140.16 | 9.79E-06  | 1.87E+06 | 5.55E+03 | 6.95E+03 | 2.82E+03 |
| Aromatic esterase 1                                                     | PON       | P27169   | 39.731 | 3.78E-08  | 1.82E+06 | 0.00E+00 | 0.00E+00 | 0.00E+00 |
| 35-beta calcimedien                                                     | ANX4      | P09525   | 35.882 | 2.48E-05  | 1.81E+06 | 0.00E+00 | 2.47E+04 | 0.00E+00 |
| BPG-dependent PGAM 1                                                    | CDABP0006 | F2Z2J9   | 28.85  | 6.47E-07  | 1.79E+06 | 0.00E+00 | 3.33E+04 | 5.04E+03 |
| Gamma-butyrobetaine dioxygenase                                         | BBH       | O75936   | 44.714 | 1.85E-03  | 1.77E+06 | 3.60E+03 | 2.33E+04 | 0.00E+00 |
| Delta-globin                                                            | HBD       | P02042   | 16.055 | 2.07E-61  | 1.73E+06 | 0.00E+00 | 0.00E+00 | 4.28E+04 |
| Bone marrow serine protease                                             | ELA2      | P08246   | 28.518 | 7.76E-08  | 1.71E+06 | 0.00E+00 | 3.16E+04 | 0.00E+00 |
| Cystatin-2                                                              | CST2      | P09228   | 16.445 | 1.44E-09  | 1.69E+06 | 2.66E+04 | 1.49E+04 | 0.00E+00 |
| Bw-45                                                                   | HLAB      | P30483   | 40.414 | 5.49E-05  | 1.68E+06 | 5.74E+03 | 0.00E+00 | 1.02E+04 |
| Cortactin-binding protein 1                                             | CORTBP1   | Q9UPX8-4 | 134.93 | 5.37E-04  | 1.67E+06 | 0.00E+00 | 0.00E+00 | 2.70E+04 |
| 15-oxoprostaglandin 13-reductase                                        | LTB4DH    | Q14914   | 35.869 | 1.94E-03  | 1.62E+06 | 6.55E+03 | 9.79E+03 | 0.00E+00 |
| Complement component 8 subunit alpha                                    | C8A       | P07357   | 65.163 | 9.23E-20  | 1.61E+06 | 0.00E+00 | 0.00E+00 | 0.00E+00 |
| Annexin A2                                                              | ANX2      | P07355-2 | 40.411 | 8.17E-13  | 1.58E+06 | 0.00E+00 | 1.74E+04 | 1.42E+04 |
| 10-formyltetrahydrofolate dehydrogenase                                 | ALDH1L1   | O75891   | 98.828 | 1.33E-06  | 1.54E+06 | 0.00E+00 | 2.98E+04 | 0.00E+00 |

|                                                             |                 |          |        |          |          |          |          |          |
|-------------------------------------------------------------|-----------------|----------|--------|----------|----------|----------|----------|----------|
| Ephrin type-A receptor 1                                    | EPH             | P21709   | 108.13 | 1.10E-08 | 1.53E+06 | 0.00E+00 | 6.55E+03 | 0.00E+00 |
|                                                             |                 | E5RH16   | 26.484 | 7.28E-45 | 1.52E+06 | 0.00E+00 | 0.00E+00 | 4.20E+03 |
| L-lactate dehydrogenase                                     | LDHA            | B7Z5E3   | 39.837 | 4.98E-24 | 1.47E+06 | 0.00E+00 | 2.26E+04 | 0.00E+00 |
| Mu-crystallin homolog                                       | CRYM            | Q14894   | 33.775 | 3.81E-06 | 1.44E+06 | 3.81E+03 | 3.51E+03 | 0.00E+00 |
| 136 kDa double-stranded RNA-binding protein                 | ADAR            | E7ENU4   | 140.83 | 1.60E-07 | 1.43E+06 | 3.60E+04 | 0.00E+00 | 0.00E+00 |
| 14-3-3 protein beta/alpha                                   | YWHAB           | P31946   | 28.082 | 1.20E-12 | 1.40E+06 | 0.00E+00 | 1.71E+04 | 0.00E+00 |
| Adenosylhomocysteinase                                      | AHCY            | P23526   | 47.716 | 7.01E-05 | 1.39E+06 | 0.00E+00 | 1.90E+04 | 0.00E+00 |
| Antagonist decoy receptor for TRAIL/Apo-2L                  | DCR1            | F5H3Y5   | 29.684 | 1.91E-04 | 1.39E+06 | 3.98E+03 | 4.72E+03 | 0.00E+00 |
| Brain immunoglobulin receptor                               | CADM3           | Q8N126-2 | 47.02  | 8.64E-07 | 1.38E+06 | 2.02E+04 | 0.00E+00 | 0.00E+00 |
| FXFD domain-containing ion transport regulator 2            | ATP1C           | P54710   | 7.2832 | 1.05E-11 | 1.37E+06 | 0.00E+00 | 0.00E+00 | 1.30E+04 |
| Primary amine oxidase                                       | ABP1            | C9J690   | 87.238 | 5.45E-06 | 1.35E+06 | 0.00E+00 | 1.37E+04 | 0.00E+00 |
| HCV NS5A-transactivated protein 13 target protein 2         | NS5ATP13TP2     | Q86UD1   | 30.688 | 6.39E-05 | 1.34E+06 | 0.00E+00 | 1.72E+03 | 7.84E+03 |
| Cytokeratin-8                                               | CYK8            | F8VXB4   | 56.608 | 2.93E-06 | 1.32E+06 | 0.00E+00 | 1.30E+04 | 4.18E+03 |
| Copine III                                                  | CPN3            | O75131   | 60.13  | 4.48E-05 | 1.31E+06 | 3.67E+03 | 3.79E+03 | 9.18E+03 |
| Alpha-actinin-4                                             | ACTN4           | O43707   | 104.85 | 5.36E-05 | 1.30E+06 | 5.93E+03 | 1.56E+04 | 0.00E+00 |
| Heat shock 70kDa protein 1-like                             | DAAP-21F2.9-001 | Q53FA3   | 70.403 | 1.72E-09 | 1.30E+06 | 7.15E+03 | 0.00E+00 | 0.00E+00 |
| Neurofascin                                                 | KIAA0756        | O94856-9 | 137.61 | 4.45E-04 | 1.30E+06 | 1.65E+03 | 2.12E+03 | 0.00E+00 |
| Anchorin CII                                                | ANX5            | P08758   | 35.936 | 3.68E-05 | 1.29E+06 | 0.00E+00 | 1.47E+04 | 4.73E+03 |
| 3-mercaptopyruvate sulfurtransferase                        | MPST            | E7ERL2   | 33.174 | 1.23E-04 | 1.29E+06 | 0.00E+00 | 1.58E+04 | 0.00E+00 |
| Leucine-rich repeat protein induced by beta-amyloid homolog | LIB             | Q8TF66-2 | 65.021 | 3.62E-05 | 1.17E+06 | 0.00E+00 | 0.00E+00 | 1.69E+04 |
| Charged multivesicular body protein 4b                      | C20orf178       | Q9H444   | 24.95  | 4.97E-05 | 1.15E+06 | 0.00E+00 | 2.78E+04 | 0.00E+00 |
| ESCRT-I complex subunit VPS28                               | VPS28           | Q9UK41-2 | 26.462 | 1.54E-06 | 1.12E+06 | 0.00E+00 | 2.44E+04 | 0.00E+00 |
| Cell division control protein 42 homolog                    | CDC42           | P60953   | 21.258 | 6.52E-10 | 1.10E+06 | 0.00E+00 | 2.26E+03 | 2.14E+04 |
| Serine protease hepsin                                      | HPN             | P05981   | 45.011 | 3.12E-06 | 1.09E+06 | 8.35E+03 | 9.00E+03 | 0.00E+00 |
| Putative uncharacterized protein FCN2                       | FCN2            | A8MT47   | 35.262 | 6.15E-06 | 1.07E+06 | 6.72E+03 | 0.00E+00 | 1.68E+03 |
| Ig heavy chain V-III region HIL                             |                 | P01771   | 13.437 | 8.05E-10 | 1.07E+06 | 1.10E+04 | 0.00E+00 | 9.02E+03 |
| Cytosolic NADP-isocitrate dehydrogenase                     | IDH1            | O75874   | 46.659 | 3.18E-05 | 1.07E+06 | 0.00E+00 | 8.83E+03 | 0.00E+00 |

|                                                                                             |           |          |        |           |          |          |          |          |
|---------------------------------------------------------------------------------------------|-----------|----------|--------|-----------|----------|----------|----------|----------|
| Ras-related protein Rab-15                                                                  | RAB15     | P59190   | 24.39  | 2.26E-13  | 1.07E+06 | 3.97E+03 | 6.88E+03 | 0.00E+00 |
| C3 and PZP-like alpha-2-macroglobulin domain-containing protein 4                           | C5        | P01031   | 188.3  | 2.09E-08  | 1.03E+06 | 0.00E+00 | 0.00E+00 | 0.00E+00 |
| Putative uncharacterized protein FAM3C                                                      | FAM3C     | C9JMN4   | 16.157 | 6.84E-42  | 1.02E+06 | 0.00E+00 | 5.03E+03 | 0.00E+00 |
| Constitutively expressed serum amyloid A protein                                            | CSAA      | P35542   | 14.746 | 2.71E-07  | 1.02E+06 | 0.00E+00 | 0.00E+00 | 0.00E+00 |
| Na-Cl symporter                                                                             | SLC12A3   | P55017-2 | 113.93 | 1.76E-04  | 1.02E+06 | 2.55E+03 | 4.38E+03 | 0.00E+00 |
| 100 kDa NT receptor                                                                         | SORT1     | Q99523   | 92.067 | 6.84E-05  | 1.01E+06 | 4.77E+03 | 1.57E+03 | 1.05E+03 |
| Pyroglutamyl-peptidase II                                                                   | TRHDE     | Q9UKU6   | 117    | 1.22E-04  | 1.00E+06 | 0.00E+00 | 0.00E+00 | 1.05E+04 |
| Ig lambda-7 chain C region                                                                  | IGLC7     | A0M8Q6   | 11.303 | 3.34E-299 | 9.98E+05 | 0.00E+00 | 8.52E+03 | 0.00E+00 |
| Atrial natriuretic peptide clearance receptor                                               | ANPRC     | P17342   | 59.807 | 2.11E-07  | 9.90E+05 | 5.15E+03 | 1.62E+04 | 0.00E+00 |
| Cytokeratin-4                                                                               | CYK4      | P19013   | 63.91  | 3.18E-08  | 9.01E+05 | 0.00E+00 | 0.00E+00 | 0.00E+00 |
| Phosphohydroxythreonine aminotransferase                                                    | PSA       | Q9Y617   | 40.422 | 3.71E-04  | 8.98E+05 | 4.39E+03 | 6.88E+03 | 0.00E+00 |
| G protein subunit beta-2                                                                    | GNB2      | P62879   | 37.331 | 7.99E-06  | 8.52E+05 | 0.00E+00 | 9.91E+03 | 8.54E+03 |
| Collagen, type XI, alpha 2                                                                  | COL11A2   | B0UXF1   | 31.9   | 1.62E-03  | 8.43E+05 | 1.29E+03 | 0.00E+00 | 1.06E+03 |
| Kinesin-like protein KIF12                                                                  | KIF12     | Q96FN5   | 70.659 | 7.61E-05  | 8.29E+05 | 0.00E+00 | 1.30E+04 | 0.00E+00 |
| Gamma-tropomyosin                                                                           | TPM3      | P06753-2 | 29.032 | 3.69E-04  | 8.18E+05 | 0.00E+00 | 2.29E+03 | 1.93E+03 |
| G-protein coupled receptor 140                                                              | GPR140    | Q96AM1   | 38.171 | 5.52E-04  | 7.40E+05 | 0.00E+00 | 0.00E+00 | 0.00E+00 |
| Apoptosis-linked gene 2 protein                                                             | ALG2      | O75340   | 21.868 | 4.81E-04  | 7.09E+05 | 0.00E+00 | 2.64E+03 | 1.69E+03 |
| Glutathione S-transferase A1                                                                | GSTA1     | P08263   | 25.631 | 2.85E-18  | 6.97E+05 | 1.06E+04 | 0.00E+00 | 0.00E+00 |
|                                                                                             |           | F8WCC8   | 44.881 | 5.98E-303 | 6.63E+05 | 0.00E+00 | 1.19E+04 | 0.00E+00 |
| Killer cell lectin-like receptor subfamily K member 1                                       | D12S2489E | P26718   | 25.274 | 5.83E-04  | 6.58E+05 | 5.05E+03 | 0.00E+00 | 0.00E+00 |
| Chromokinesin-B                                                                             | KIF4B     | Q2VIQ3   | 140.03 | 1.68E-03  | 6.53E+05 | 0.00E+00 | 5.27E+03 | 0.00E+00 |
| cDNA FLJ53670, highly similar to EGF-containing fibulin-like extracellular matrix protein 1 |           | B4DW75   | 39.195 | 0.00E+00  | 6.00E+05 | 3.60E+03 | 0.00E+00 | 0.00E+00 |
| Ephrin type-A receptor 2                                                                    | ECK       | P29317   | 108.27 | 2.41E-03  | 5.81E+05 | 0.00E+00 | 2.04E+03 | 0.00E+00 |
| Putative uncharacterized protein MUC20                                                      | MUC20     | C9JJE7   | 73.131 | 3.15E-16  | 5.68E+05 | 0.00E+00 | 1.26E+04 | 1.43E+04 |
| Ig kappa chain V-III region GOL                                                             |           | P04206   | 11.83  | 1.36E-208 | 5.63E+05 | 0.00E+00 | 3.93E+03 | 2.20E+03 |
| LC64P                                                                                       | LCPI      | P13796   | 70.288 | 1.34E-04  | 5.49E+05 | 0.00E+00 | 2.67E+03 | 1.53E+04 |

|                                                                  |          |          |        |          |          |          |          |          |
|------------------------------------------------------------------|----------|----------|--------|----------|----------|----------|----------|----------|
| Erythrocyte band 7 integral membrane protein                     | BND7     | P27105   | 31.73  | 1.39E-07 | 5.22E+05 | 0.00E+00 | 1.48E+04 | 0.00E+00 |
| Involucrin                                                       | IVL      | P07476   | 68.478 | 3.99E-04 | 5.19E+05 | 0.00E+00 | 1.06E+04 | 0.00E+00 |
| Formimidoyltetrahydrofolate cyclodeaminase                       | FTCD     | O95954   | 58.926 | 8.53E-04 | 4.93E+05 | 0.00E+00 | 1.10E+04 | 0.00E+00 |
| Guanine nucleotide-binding protein G(I)/G(S)/G(T) subunit beta-1 | GNB1     | P62873   | 37.377 | 1.17E-03 | 4.93E+05 | 0.00E+00 | 9.25E+03 | 0.00E+00 |
| Fructose transporter                                             | GLUT5    | P22732   | 54.973 | 6.90E-06 | 4.84E+05 | 0.00E+00 | 3.64E+03 | 2.70E+03 |
| 84 kDa myeloperoxidase                                           | MPO      | P05164-3 | 87.248 | 1.56E-05 | 4.63E+05 | 0.00E+00 | 0.00E+00 | 1.74E+04 |
| Apolipoprotein L                                                 | APOL     | O14791-2 | 45.918 | 2.43E-05 | 4.55E+05 | 0.00E+00 | 0.00E+00 | 0.00E+00 |
| Collagen alpha-5(IV) chain                                       | COL4A5   | E7EQD0   | 161.66 | 9.10E-04 | 4.31E+05 | 0.00E+00 | 0.00E+00 | 4.88E+02 |
| Cadherin family member 14                                        | CDHF14   | Q6V0I7   | 542.68 | 8.98E-04 | 4.16E+05 | 0.00E+00 | 9.53E+03 | 0.00E+00 |
| Heat shock 84 kDa                                                | HSP90AB1 | P08238   | 83.263 | 3.67E-27 | 3.71E+05 | 0.00E+00 | 4.13E+03 | 0.00E+00 |
| 14-3-3 protein gamma                                             | YWHAQ    | P61981   | 28.302 | 1.46E-08 | 3.67E+05 | 7.01E+02 | 4.08E+03 | 2.29E+03 |
| Heterogeneous nuclear ribonucleoprotein M                        | HNRNPM   | P52272   | 77.515 | 5.78E-04 | 3.25E+05 | 2.50E+03 | 1.85E+03 | 0.00E+00 |
| NADPH:quinone reductase                                          | CRYZ     | Q08257   | 35.206 | 1.29E-03 | 2.53E+05 | 0.00E+00 | 5.91E+03 | 0.00E+00 |
| Membrane-organizing extension spike protein                      | MSN      | P26038   | 67.819 | 1.94E-10 | 2.49E+05 | 0.00E+00 | 2.89E+03 | 0.00E+00 |
| Angiopoietin-like 2                                              | ANGPTL2  | Q8NCH7   | 22.717 | 2.31E-42 | 2.42E+05 | 0.00E+00 | 4.21E+03 | 0.00E+00 |
| Charged multivesicular body protein 1a                           | CHMP1    | Q9HD42   | 21.703 | 9.88E-04 | 2.28E+05 | 0.00E+00 | 2.36E+03 | 0.00E+00 |
| Alanine aminotransferase 1                                       | AAT1     | P24298   | 54.636 | 1.19E-08 | 2.00E+05 | 0.00E+00 | 3.54E+03 | 0.00E+00 |
| Ig heavy chain V-III region BUR                                  |          | P01773   | 12.265 | 2.74E-03 | 1.68E+05 | 4.32E+03 | 0.00E+00 | 0.00E+00 |
|                                                                  |          | Q32PJ2   | 43.017 | 9.77E-05 | 1.51E+05 | 0.00E+00 | 0.00E+00 | 3.19E+03 |
| Ig heavy chain V-III region KOL                                  |          | P01772   | 13.718 | 9.87E-07 | 1.05E+05 | 0.00E+00 | 0.00E+00 | 0.00E+00 |
| Ephrin type-A receptor 10                                        | EPHA10   | Q5JZY3   | 109.63 | 1.39E-78 | 1.04E+05 | 1.08E+03 | 0.00E+00 | 0.00E+00 |
| Heat shock-related 70 kDa protein 2                              | HSPA2    | P54652   | 70.02  | 8.08E-10 | 8.90E+04 | 0.00E+00 | 9.75E+02 | 0.00E+00 |
| Latent-transforming growth factor beta-binding protein 3         | LTBP3    | Q9NS15   | 139.36 | 1.30E-04 | 5.01E+04 | 0.00E+00 | 0.00E+00 | 8.30E+02 |
| 14-3-3 protein tau                                               | YWHAQ    | P27348   | 27.764 | 1.22E-08 | 4.97E+04 | 0.00E+00 | 1.42E+03 | 0.00E+00 |
| Putative uncharacterized protein MDH1                            | MDH1     | C9JRL4   | 13.044 | 1.55E-45 | 0.00E+00 | 0.00E+00 | 0.00E+00 | 0.00E+00 |

**Supplementary Table 2.** Statistical analysis of the quantified proteins. In the table are reported proteins significantly modulated (P value <0.01) by ANOVA test among SS, SR patients and control C and proteins significantly modulate after T test analysis between the groups indicated in the row. Protein names, gene names, Uniprot ID for each protein was also reported in the table.

| Protein Names                                   | Gene Names | Uniprot  | ANOVA p value | T-test P-VALUE CvsSR | T-test P-VALUE CvsSS | T test P-VALUE SRvsSS |
|-------------------------------------------------|------------|----------|---------------|----------------------|----------------------|-----------------------|
| Alpha-globin                                    | HBA1       | P69905   | 2.23E-04      |                      | 8.27E-03             | 1.42E-02              |
| N-sulphoglucosamine sulphohydrolase             | HSS        | P51688   | 1.92E-05      |                      | 8.92E-03             | 1.67E-03              |
| Beta-globin                                     | HBB        | P68871   | 5.80E-05      |                      | 3.23E-03             | 6.35E-03              |
| Filamin B                                       | FLNB       | B2ZZ83   | 2.36E-05      |                      | 4.45E-04             | 3.69E-04              |
| nephrin 1                                       | KIRREL     | Q96J84-2 | 4.97E-04      | 5.04E-03             | 8.58E-04             | 4.54E-02              |
| Anti-neoplastic urinary protein                 | ARS        | P55000   | 9.11E-04      |                      | 5.02E-03             | 3.94E-03              |
| Hemicentin-2                                    | HMCN2      | Q8NDA2   | 6.43E-05      |                      | 2.67E-03             | 6.52E-05              |
| Afamin                                          | AFM        | P43652   | 3.97E-04      |                      | 1.80E-04             | 3.94E-03              |
| Cadherin-2                                      | CDH2       | P19022   | 1.49E-04      |                      | 3.68E-04             | 2.18E-02              |
| CCN family member 3                             | CCN3       | P48745   | 1.43E-04      |                      | 2.31E-03             | 5.74E-03              |
| Ig alpha-1 chain C region                       | IGHA1      | P01876   | 2.32E-03      |                      | 6.54E-04             | 3.35E-03              |
| Immunoglobulin J chain                          | IGCJ       | P01591   | 7.06E-04      |                      | 7.38E-04             | 6.11E-04              |
| Chondroitin sulfate proteoglycan 4              | CSPG4      | Q6UVK1   | 8.51E-04      |                      | 1.37E-03             | 1.49E-03              |
| Hepatocellular carcinoma-associated protein TB6 | PIGR       | P01833   | 4.86E-05      |                      | 3.31E-06             | 1.66E-04              |
| Alanyl aminopeptidase                           | ANPEP      | P15144   | 1.85E-05      |                      | 5.66E-05             | 4.74E-07              |
| Auberger B antigen                              | BCAM       | P50895   | 2.60E-03      |                      | 5.08E-03             | 1.34E-03              |
| Gamma-glutamyltransferase 1                     | GGT        | P19440   | 1.06E-07      | 1.22E-03             | 8.90E-04             | 2.90E-07              |
| Collagen alpha-1(VI) chain                      | COL6A1     | P12109   | 1.03E-05      |                      | 2.42E-05             | 1.16E-04              |
| Herpes virus entry mediator B                   | HVEB       | Q92692   | 3.89E-05      |                      | 6.48E-07             | 4.65E-03              |
| Entactin                                        | NID        | P14543   | 1.33E-05      |                      | 1.02E-04             | 8.27E-03              |
| Magic roundabout                                | ROBO4      | Q8WZ75   | 6.17E-04      |                      | 2.32E-04             | 1.77E-04              |
| Alpha-N-acetylglucosaminidase                   | NAGLU      | P54802   | 2.60E-04      |                      | 3.28E-04             | 2.73E-02              |
| Glycoprotein GP36b                              | C5orf8     | Q12907   | 9.44E-06      |                      | 9.18E-08             | 1.24E-02              |
| Gamma-seminoprotein                             | APS        | P07288   | 5.88E-03      |                      | 2.11E-03             | 5.25E-03              |
| 6-phosphogluconolactonase                       | PGLS       | O95336   | 7.51E-05      |                      | 7.34E-05             | 2.76E-03              |
| Protocadherin gamma-C3                          | PCDH2      | Q9UN70   | 3.21E-04      |                      | 9.38E-07             | 9.94E-03              |
| Nuclear transport factor 2                      | NTF2       | P61970   | 5.93E-05      |                      | 1.62E-04             | 1.40E-04              |
| Prostatic acid phosphatase                      | ACPP       | P15309   | 5.38E-05      |                      | 3.92E-04             | 1.49E-04              |
| Carboxypeptidase E                              | CPE        | P16870   | 2.02E-07      |                      | 1.10E-04             | 1.80E-07              |

|                                             |          |          |          |          |          |          |
|---------------------------------------------|----------|----------|----------|----------|----------|----------|
| Peptidoglycan recognition protein 1         | PGLYRP   | O75594   | 1.74E-03 |          | 1.12E-05 | 6.70E-03 |
| Ig heavy chain V-III region VH26            |          | P01764   | 1.56E-05 | 1.92E-03 | 8.98E-05 | 3.62E-02 |
| Dehydropeptidase-I                          | DPEP1    | P16444   | 3.71E-03 |          | 2.82E-03 | 5.41E-05 |
| Beta-2-microglobulin                        | B2M      | P61769   | 3.71E-05 |          | 1.71E-05 | 3.13E-05 |
| Ig kappa chain V-I region Scw               |          | P01609   | 1.26E-12 | 2.95E-12 | 2.04E-06 | 2.00E-02 |
| C-type lectin domain family 14 member A     | C14orf27 | Q86T13   | 4.41E-03 |          | 1.29E-03 | 1.67E-02 |
| Acid beta-galactosidase                     | ELNR1    | P16278   | 2.59E-03 |          | 1.18E-03 | 2.62E-02 |
| Glutathione S-transferase P                 | FAEES3   | P09211   | 1.45E-03 |          | 5.52E-03 | 6.82E-04 |
| Lipocalin-1                                 | LCN1     | P31025   | 1.54E-06 | 1.92E-05 | 1.13E-03 | 3.32E-02 |
| Protein FAM3C                               | FAM3C    | Q92520   | 7.28E-05 |          | 7.75E-06 | 6.71E-04 |
| Cathepsin C                                 | CPPI     | P53634   | 3.29E-05 |          | 1.94E-05 | 4.19E-03 |
| Aminopeptidase A                            | ENPEP    | Q07075   | 7.25E-04 |          | 3.18E-04 | 1.91E-02 |
| Ig superfamily receptor LNIR                | LNIR     | Q96NY8   | 1.67E-11 |          | 3.11E-08 | 5.67E-09 |
| Ig heavy chain V-III region BRO             |          | P01766   | 2.76E-03 |          | 4.71E-04 | 1.86E-02 |
| Melanoma-associated antigen p97             | MAP97    | P08582   | 2.25E-05 |          | 5.33E-06 | 9.02E-04 |
| ITIH4 protein                               | ITIH4    | B7ZKJ8   | 4.54E-03 |          | 4.57E-03 | 1.57E-02 |
| Growth/differentiation factor 15            | GDF15    | Q99988   | 1.94E-03 |          | 2.06E-03 | 1.01E-04 |
| Natural killer cell-enhancing factor A      | PAGA     | Q06830   | 1.80E-04 |          | 9.67E-06 | 2.70E-04 |
| 28 kDa heat shock protein                   | HSP27    | P04792   | 5.78E-05 | 3.92E-03 | 2.91E-03 | 3.93E-04 |
| CD167 antigen-like family member A          | CAK      | Q08345-5 | 2.23E-03 |          | 5.71E-04 | 2.15E-04 |
| Ig mu chain C region                        | IGHM     | P01871-2 | 3.10E-09 | 1.86E-04 | 1.13E-12 | 9.59E-03 |
| Cyclophilin B                               | CYPB     | P23284   | 4.34E-06 |          | 2.10E-07 | 6.45E-05 |
| Low-density lipoprotein receptor            | LDLR     | P01130   | 5.80E-05 | 4.89E-03 | 1.77E-04 | 1.46E-02 |
| Ceroid-lipofuscinosis neuronal protein 5    | CLN5     | O75503   | 5.51E-03 |          | 1.63E-03 | 4.32E-04 |
| Calgranulin-A                               | CAGA     | P05109   | 7.73E-03 |          | 2.07E-03 | 1.15E-02 |
| CCP module-containing protein 22            | C9orf13  | Q4LDE5   | 2.59E-06 |          | 2.51E-03 | 2.51E-03 |
| Dopamine-responsive gene 1 protein          | C6orf55  | Q9NP79   | 6.42E-04 | 2.21E-03 |          | 1.36E-02 |
| Endoglin                                    | END      | P17813   | 1.16E-03 |          |          | 1.20E-02 |
| DRT                                         | DRT      | P29323   | 2.59E-04 | 3.15E-04 |          | 3.31E-02 |
| Apolipoprotein A4                           | APOA4    | P06727   | 6.18E-04 |          |          | 9.81E-03 |
| Glycine hydroxymethyltransferase            | SHMT1    | P34896   | 1.93E-03 | 5.62E-03 |          | 1.73E-02 |
| Betaine--homocysteine S-methyltransferase 1 | BHMT     | Q93088   | 1.90E-03 | 5.17E-03 |          | 2.04E-02 |
| Cadherin-related family member 5            | CDHR5    | Q9HBB8   | 2.70E-04 | 1.64E-04 |          | 3.96E-02 |
| Cancer/testis antigen 19                    | IL13R    | P78552   | 5.19E-04 | 2.80E-03 |          | 2.17E-03 |

|                                                          |                  |          |          |          |          |
|----------------------------------------------------------|------------------|----------|----------|----------|----------|
| CD107 antigen-like family member A                       | LAMP1            | P11279   | 2.26E-05 | 2.16E-05 | 3.03E-02 |
| Fibrillin-1                                              | FBN              | P35555   | 6.47E-03 |          | 4.80E-02 |
| APP secretase                                            | CPSB             | P07858   | 2.73E-03 |          | 9.72E-03 |
| Di-N-acetylchitobiase                                    | CTB              | Q01459   | 3.59E-05 | 9.16E-03 | 6.75E-05 |
| Lymphocyte antigen 6H                                    | LY6H             | O94772   | 5.60E-03 |          | 1.01E-02 |
| Calcium-independent phospholipase A2-gamma               | BM-043           | Q9NP80   | 1.61E-03 | 5.25E-04 | 5.97E-03 |
| Epidermal growth factor-like protein 4                   | C19orf49         | Q7Z7M0   | 1.70E-04 | 1.21E-04 | 4.60E-03 |
| Vitelline membrane outer layer protein 1 homolog         | UNQ6350/PRO21055 | Q7Z5L0   | 4.89E-05 | 9.05E-05 | 4.68E-03 |
| Neural cell adhesion molecule 1                          | NCAM             | P13591   | 6.68E-03 |          | 1.83E-02 |
| Hexabrachion-like protein                                | HXBL             | E7EPZ9   | 9.20E-03 |          | 2.09E-02 |
| Alpha-1-acid glycoprotein 2                              | AGP2             | P19652   | 3.91E-03 |          | 4.59E-04 |
| Protein S100-A7                                          | PSOR1            | P31151   | 9.28E-03 |          | 2.99E-02 |
| E3 ubiquitin-protein ligase RNF167                       | LP2254           | Q9H6Y7   | 4.06E-05 | 8.91E-05 | 1.97E-03 |
| OPCML protein                                            | OPCML            | B7ZLQ1   | 9.81E-03 |          | 5.83E-03 |
| GTP cyclohydrolase 1 feedback regulatory protein         | GCHFR            | P30047   | 5.47E-03 | 6.90E-03 | 2.67E-02 |
| Latent-transforming growth factor beta-binding protein 4 | LTBP4            | Q8N2S1-2 | 5.67E-03 |          | 7.15E-03 |
| Limitrin                                                 | MXRA8            | Q9BRK3-2 | 9.93E-03 | 5.56E-03 | 4.47E-02 |
| Cysteine-rich secretory protein 9                        | CRISP9           | Q6UXB8   | 3.78E-04 | 6.96E-07 | 6.18E-03 |
| Interleukin-18-binding protein                           | IL18BP           | G3V1C5   | 6.08E-04 | 5.88E-04 | 2.24E-02 |
| 70 kDa lysosomal alpha-glucosidase                       | GAA              | P10253   | 7.43E-05 | 4.78E-05 | 1.84E-02 |
| Aging-associated gene 4 protein                          | AAG4             | P10909-2 | 4.48E-03 | 3.64E-03 | 4.23E-02 |
| Apolipoprotein E                                         | APOE             | P02649   | 3.02E-05 | 5.89E-05 | 1.57E-03 |
| Cadherin-6                                               | CDH6             | P55285   | 5.13E-05 | 2.29E-05 | 8.53E-04 |
| Cyclophilin A                                            | CYPA             | P62937   | 5.14E-05 | 5.32E-05 | 1.84E-03 |
| 460 kDa receptor                                         | CUBN             | O60494   | 1.09E-06 | 7.43E-07 | 2.98E-04 |
| CD62 antigen-like family member L                        | LNHR             | P14151   | 6.07E-03 | 3.20E-03 | 8.17E-03 |
| Biglycan                                                 | BGN              | P21810   | 1.63E-03 | 1.71E-03 | 1.11E-02 |
| C3B/C4B inactivator                                      | CFI              | E7ETH0   | 2.66E-04 | 7.47E-05 | 1.21E-02 |
| CD85 antigen-like family member F                        | ILT11            | A6NI73   | 3.41E-03 | 9.61E-04 | 3.23E-02 |
| GCTM-2 antigen                                           | PCLP             | F5GWY5   | 8.03E-04 | 1.37E-03 | 1.23E-02 |
| Man(9)-alpha-mannosidase                                 | MAN1A1           | P33908   | 6.58E-04 | 2.10E-03 | 2.86E-03 |
| Heat shock 86 kDa                                        | HSP90A           | P07900-2 | 7.32E-03 |          | 2.38E-02 |
| B(2)GCN homolog                                          | EIF3A            | P56537   | 2.08E-06 | 3.00E-05 | 5.19E-04 |



|                                                          |           |          |          |          |          |
|----------------------------------------------------------|-----------|----------|----------|----------|----------|
| Adipose tissue-specific secretory factor                 | FIZZ3     | Q9HD89   | 4.70E-03 | 1.22E-03 | 3.73E-02 |
| C-type lectin domain family 4 member G                   | CLEC4G    | Q6UXB4   | 9.10E-03 | 1.04E-03 | 2.63E-02 |
| Chondrolectin                                            | C21orf68  | Q9H9P2   | 9.23E-03 | 4.23E-04 | 3.32E-02 |
| Glycoprotein 330                                         | LRP2      | P98164   | 1.82E-04 | 2.37E-04 | 1.79E-03 |
| Islet cells regeneration factor                          | PSPS      | P05451   | 3.84E-04 | 2.77E-06 | 8.88E-03 |
| Receptor expressed in lymphoid tissues                   | RELT      | Q969Z4   | 9.20E-04 | 1.39E-03 | 5.96E-03 |
| cDNA FLJ32696 fis, clone TESTI2000358                    | IST1      | A8KAH5   | 9.00E-04 | 1.20E-03 | 7.60E-03 |
| cDNA FLJ32696 fis, clone TESTI2000358                    | IST1      | A8KAH5   | 8.83E-04 | 1.61E-03 | 5.89E-03 |
| Actin, cytoplasmic 1                                     | ACTB      | P60712   | 5.22E-04 | 2.87E-03 | 2.88E-03 |
| Anthrax toxin receptor 1                                 | ANTXR1    | Q9H6X2   | 3.10E-06 | 2.49E-07 | 5.81E-04 |
| Endonuclease domain-containing 1 protein                 | ENDOD1    | O94919   | 6.63E-04 | 5.16E-04 | 8.78E-03 |
| Golgi membrane protein 1                                 | C9orf155  | Q8NBJ4   | 1.47E-03 | 8.72E-03 | 2.44E-03 |
| Density-enhanced phosphatase 1                           | DEP1      | Q12913   | 2.76E-03 | 2.52E-03 | 7.60E-03 |
| Triosephosphate isomerase                                | TPI       | P60174   | 2.83E-03 | 7.59E-03 | 5.60E-03 |
| Latent-transforming growth factor beta-binding protein 1 | LTBP1     | Q14766-4 | 1.13E-04 | 6.19E-06 | 6.19E-03 |
| CNDP dipeptidase 2                                       | CN2       | Q96KP4   | 3.60E-04 | 3.30E-03 | 1.83E-03 |
| Alpha-1 type I collagen                                  | COL1A1    | P02452   | 4.48E-04 | 4.11E-05 | 2.37E-02 |
| Agrin                                                    | AGRIN     | O00468   | 1.02E-05 | 1.32E-05 | 6.14E-03 |
| Contactin-1                                              | CNTN1     | Q12860   | 8.55E-03 |          | 9.55E-03 |
| Carboxypeptidase N 83 kDa chain                          | ACBP      | P22792   | 1.40E-04 | 2.44E-03 | 7.59E-04 |
| Neuroserpin                                              | PII2      | Q99574   | 9.77E-03 |          | 1.65E-02 |
| Heat shock 70 kDa protein 8                              | HSC70     | P11142   | 4.89E-04 | 4.31E-03 | 1.52E-03 |
| 14-3-3 protein zeta/delta                                | YWHAZ     | E7EX29   | 1.78E-04 | 1.94E-03 | 4.28E-05 |
| Choline phosphatase 3                                    | PLD3      | Q8IV08   | 2.30E-04 |          | 3.22E-04 |
| Sushi domain-containing protein 2                        | SUSD2     | Q9UGT4   | 9.51E-04 |          | 7.55E-04 |
| Alpha-2-HS-glycoprotein                                  | AHSG      | F5H0Q5   | 2.57E-05 | 5.10E-07 | 4.44E-02 |
| Lysosomal acid phosphatase                               | ACP2      | P11117   | 1.12E-07 | 1.05E-04 | 2.18E-06 |
| Ig kappa chain V-III region VG                           |           | P04433   | 4.25E-05 | 1.61E-05 | 4.51E-02 |
| 2-phospho-D-glycerate hydro-lyase                        | ENO1      | P06733   | 1.75E-05 | 1.01E-03 | 8.78E-05 |
| 14-3-3 protein epsilon                                   | YWHAE     | P62258   | 1.68E-04 | 3.36E-03 | 5.57E-04 |
| Prolylcarboxypeptidase (Angiotensinase C), isoform CRA_b | hCG_27286 | A8MU24   | 2.13E-04 |          | 4.91E-04 |

|                                                                  |           |          |          |          |          |
|------------------------------------------------------------------|-----------|----------|----------|----------|----------|
| Endothelial cell-selective adhesion molecule                     | ESAM      | Q96AP7   | 6.96E-04 | 1.47E-04 | 2.95E-02 |
| CD209 antigen                                                    | CD209     | Q9NNX6   | 1.96E-05 | 1.30E-06 | 1.43E-02 |
| Fructose-bisphosphate aldolase B                                 | ALDB      | P05062   | 2.07E-04 | 6.28E-03 | 9.09E-04 |
| Antigen CD42b-alpha                                              | GP1BA     | E7ES66   | 2.13E-05 | 1.78E-05 | 5.41E-03 |
| AIG2-like domain-containing protein 1                            | A2LD1     | Q9BVM4   | 1.89E-04 | 7.88E-04 | 1.47E-03 |
| High endothelial venule protein                                  | SPARCL1   | Q14515   | 1.19E-03 |          | 2.00E-03 |
| Haptoglobin                                                      | HP        | P00738   | 1.45E-03 | 2.76E-03 | 1.56E-02 |
| MOCO1-A                                                          | MOCO1     | O96033   | 2.43E-03 |          | 4.74E-04 |
| Coactosin-like protein                                           | CLP       | Q14019   | 3.10E-03 |          | 1.37E-03 |
| Aromatic-L-amino-acid decarboxylase                              | AADC      | P20711   | 9.99E-03 |          | 7.14E-03 |
| Fc-gamma RIII-beta                                               | CD16B     | O75015   | 1.91E-04 | 5.56E-03 | 8.75E-04 |
| Bumetanide-sensitive sodium-(potassium)-chloride cotransporter 2 | NKCC2     | E9PDW4   | 2.00E-04 | 1.29E-02 | 1.54E-04 |
| Placental ribonuclease inhibitor                                 | PRI       | P13489   | 8.79E-05 | 4.75E-03 | 2.31E-04 |
| NRH dehydrogenase [quinone] 2                                    | NMOR2     | P16083   | 1.34E-07 | 8.99E-05 | 3.08E-05 |
| Leucine-rich repeat neuronal protein 4                           | C20orf75  | Q8WUT4   | 4.74E-03 |          | 1.25E-02 |
| Charged multivesicular body protein 5                            | C9orf83   | Q9NZZ3   | 7.40E-03 |          | 1.29E-02 |
| Apyrase homolog                                                  | CANT1     | Q8WVQ1   | 9.10E-03 |          | 3.41E-03 |
| Bumetanide-sensitive sodium-(potassium)-chloride cotransporter 2 | NKCC2     | E9PDW4   | 2.43E-04 | 1.29E-03 | 1.54E-04 |
| Aldehyde reductase                                               | AKR1B1    | P15121   | 1.35E-04 | 2.31E-03 | 2.31E-03 |
| Fibrinolytic                                                     | TGM4      | P49221   | 1.39E-04 | 2.43E-03 | 2.35E-03 |
| Angiotensin-converting enzyme                                    | ACE       | P12821   | 1.72E-03 | 2.53E-03 | 4.20E-02 |
| CDw113                                                           | PRR3      | Q9NQS3   | 7.38E-04 | 3.82E-03 | 1.00E-02 |
| BPG-dependent PGAM 1                                             | CDABP0006 | F2Z2J9   | 4.18E-05 | 4.85E-04 | 2.87E-03 |
| L-lactate dehydrogenase                                          | LDHA      | B7Z5E3   | 2.84E-04 | 3.46E-03 | 3.46E-03 |
| ESCRT-I complex subunit VPS28                                    | VPS28     | Q9UK41-2 | 8.65E-04 | 6.40E-03 | 6.40E-03 |
| Cytosolic NADP-isocitrate dehydrogenase                          | IDH1      | O75874   | 1.82E-03 | 9.75E-03 | 9.95E-03 |
| Kinesin-like protein KIF12                                       | KIF12     | Q96FN5   | 8.28E-04 | 6.25E-03 | 6.41E-03 |
| Amyloid protein homolog                                          | APLP2     | Q06481   | 2.77E-03 |          | 1.24E-02 |
| Histone H1.5                                                     | H1F5      | P16401   | 2.37E-04 |          | 1.40E-02 |
| 15-hydroxyprostaglandin dehydrogenase [NADP+]                    | CBR       | P16152   | 2.65E-03 |          | 1.21E-02 |

|                                                                  |         |        |          |          |  |          |
|------------------------------------------------------------------|---------|--------|----------|----------|--|----------|
| 35-beta calcimedlin                                              | ANX4    | P09525 | 4.40E-03 |          |  | 1.62E-02 |
| Delta-globin                                                     | HBD     | P02042 | 1.23E-04 |          |  | 1.08E-02 |
| 14-3-3 protein beta/alpha                                        | YWHAB   | P31946 | 2.51E-03 |          |  | 1.17E-02 |
| Adenosylhomocysteinase                                           | AHCY    | P23526 | 3.50E-03 |          |  | 1.42E-02 |
| Cell division control protein 42 homolog                         | CDC42   | P60953 | 1.45E-03 |          |  | 3.40E-02 |
| Pyroglutamyl-peptidase II                                        | TRHDE   | Q9UKU6 | 1.14E-03 |          |  | 2.63E-02 |
| Guanine nucleotide-binding protein G(I)/G(S)/G(T) subunit beta-1 | GNB1    | P62873 | 2.90E-03 |          |  | 1.27E-02 |
| Cadherin family member 14                                        | CDHF14  | Q6V0I7 | 4.18E-03 |          |  | 1.60E-02 |
| NADPH:quinone reductase                                          | CRYZ    | Q08257 | 8.78E-03 |          |  | 2.44E-02 |
| 10-formyltetrahydrofolate dehydrogenase                          | ALDH1L1 | O75891 | 5.97E-03 |          |  | 1.94E-02 |
| 300 kDa mannose 6-phosphate receptor                             | IGF2R   | P11717 | 5.68E-04 | 1.15E-03 |  | 7.21E-04 |
| Kaliocin-1                                                       | LF      | P02788 | 7.45E-03 | 3.42E-04 |  |          |
| Epidermal-type fatty acid-binding protein                        | FABP5   | Q01469 | 8.64E-03 | 3.08E-04 |  |          |
| Actin regulatory protein CAP-G                                   | AFCP    | P40121 | 3.58E-03 | 2.00E-03 |  | 5.29E-03 |
| Metallothionein-0                                                | MT1H    | P80294 | 1.71E-03 | 1.51E-03 |  |          |
| Fetal antigen 1                                                  | DLK     | P80370 | 5.67E-03 |          |  | 3.29E-03 |
| Tamm-Horsfall urinary glycoprotein                               | UMOD    | E9PEA4 | 1.71E-06 | 2.00E-07 |  | 2.71E-04 |
| 18 kDa cationic antimicrobial protein                            | CAMP    | P49913 | 8.59E-04 | 1.63E-04 |  | 5.16E-03 |
| Epididymal secretory protein E4                                  | HE4     | Q14508 | 5.49E-07 | 2.61E-05 |  | 2.86E-06 |
| Aggrecan core protein                                            | ACAN    | E7EX88 | 7.98E-04 |          |  | 1.55E-04 |
| Protein HEG homolog 1                                            | HEG1    | Q9ULI3 | 2.95E-04 | 1.42E-03 |  | 2.54E-03 |
| Spasmolysin                                                      | SML1    | Q03403 | 1.90E-03 |          |  | 8.94E-03 |
| Glucocorticoid-inducible protein 5                               | GIS5    | Q9GZM7 | 2.59E-03 |          |  | 3.03E-03 |
| 76 kDa protein                                                   | PLBD2   | Q8NHP8 | 6.85E-05 | 4.35E-04 |  | 7.22E-04 |
| Acrogranin                                                       | GRN     | P28799 | 2.80E-03 | 2.00E-04 |  |          |
| EndoCAM                                                          | PECAM1  | P16284 | 4.00E-03 |          |  | 1.18E-04 |
| Fetomodulin                                                      | THBD    | P07204 | 7.28E-04 | 1.58E-04 |  |          |
| Kringle domain-containing protein HGFL                           | HGFL    | Q96FE7 | 1.16E-03 |          |  | 5.49E-03 |
| Gp80-LNGFR                                                       | NGFR    | P08138 | 2.84E-03 | 2.72E-03 |  | 4.84E-03 |
| Acrosomal serine protease inhibitor                              | PCI     | P05154 | 8.14E-05 | 2.09E-04 |  | 3.65E-04 |
| Insulin-like growth factor-binding protein 2                     | BP2     | P18065 | 6.44E-03 | 2.31E-03 |  |          |
| Mucosal addressin cell adhesion molecule 1                       | MADCAM1 | F5H511 | 2.56E-03 | 4.35E-05 |  |          |
| ABPP                                                             | A4      | P05067 | 5.67E-06 | 4.32E-05 |  | 6.09E-05 |

|                                                                              |         |        |          |          |          |
|------------------------------------------------------------------------------|---------|--------|----------|----------|----------|
| Epidermal growth factor                                                      | EGF     | P01133 | 1.80E-04 | 2.23E-04 | 5.72E-04 |
| Herpes virus entry mediator A                                                | HVEA    | Q92956 | 9.59E-04 | 2.41E-03 | 1.37E-03 |
| Complement component C7                                                      | C7      | P10643 | 1.12E-03 | 1.54E-03 | 6.55E-04 |
| Metallothionein-1X                                                           | MT1X    | P80297 | 4.73E-03 | 1.21E-03 |          |
| Peptide O-xylosyltransferase 1                                               | XT1     | Q86Y38 | 4.15E-03 | 1.71E-03 |          |
| Putative uncharacterized protein BTN2A1                                      | BTN2A1  | B9ZVU6 | 4.42E-04 | 5.39E-04 | 1.07E-03 |
| Anastellin                                                                   | FN      | P02751 | 6.37E-03 | 2.32E-03 |          |
| Nectin-like protein 5                                                        | PVR     | P15151 | 3.06E-03 | 1.80E-03 |          |
| Gc-globulin                                                                  | GC      | P02774 | 2.76E-03 | 1.45E-03 |          |
| Bone sialoprotein 1                                                          | BNSP    | P10451 | 8.73E-03 | 4.43E-03 |          |
| Putative uncharacterized protein CDH13                                       | CDH13   | C9JRI6 | 6.90E-03 | 9.53E-04 |          |
| Basement membrane-specific heparan sulfate proteoglycan core protein         | HSPG2   | P98160 | 3.95E-03 | 6.29E-03 | 2.78E-03 |
| 5F7                                                                          | BSG     | P35613 | 5.85E-03 | 1.31E-03 |          |
| CD55 molecule, decay accelerating factor for complement (Cromer blood group) | CD55    | B1AP13 | 5.04E-04 | 4.30E-05 |          |
| Alpha-1-antichymotrypsin                                                     | AACT    | G3V5I3 | 3.92E-03 | 5.00E-04 |          |
| Cerebroside sulfate activator protein                                        | GM2A    | P17900 | 2.20E-03 | 7.51E-04 |          |
| Ig lambda-2 chain C regions                                                  | IGLC2   | P0CG05 | 5.28E-03 | 2.61E-04 |          |
| Cell surface glycoprotein MUC18                                              | MCAM    | P43121 | 3.43E-03 | 5.64E-08 |          |
| Ig kappa chain V-II region GM607                                             |         | P06309 | 7.89E-04 | 2.36E-04 |          |
| Beta-trace protein                                                           | PDS     | F8W7I2 | 2.74E-04 | 1.27E-05 |          |
| 1,4-alpha-D-glucan glucanohydrolase                                          | AMY2A   | P04746 | 6.32E-03 |          | 1.30E-03 |
| Protein CEGP1                                                                | CEGP1   | E7EQD6 | 2.69E-04 | 1.33E-04 |          |
| Alpha-1 protease inhibitor                                                   | AAT     | P01009 | 2.61E-03 | 8.68E-03 | 4.20E-03 |
| Cell surface retention sequence-binding protein 1                            | CRSBP1  | Q9Y5Y7 | 1.42E-04 | 1.08E-06 |          |
| Ig kappa chain V-III region SIE                                              |         | P01620 | 6.36E-03 |          | 6.87E-04 |
| CD81 partner 3                                                               | CD81P3  | Q969P0 | 2.02E-05 | 2.31E-03 | 1.39E-07 |
| Ig kappa chain V-I region AG                                                 |         | P01593 | 2.48E-05 | 2.71E-04 | 1.72E-05 |
| HDC                                                                          | IGHG3   | P01860 | 1.77E-04 | 2.96E-04 | 9.09E-03 |
| 1,4-alpha-D-glucan glucanohydrolase 1                                        | AMY1    | P04745 | 2.66E-03 | 1.23E-06 |          |
| Ig kappa chain V-IV region JI                                                | IGKV4-1 | P06313 | 7.35E-03 |          | 1.76E-03 |

|                                                     |         |          |          |          |          |
|-----------------------------------------------------|---------|----------|----------|----------|----------|
| Putative uncharacterized protein<br>ENSP00000323500 | PGCP    | B5MDX4   | 5.76E-04 | 2.04E-03 | 1.27E-03 |
| Alpha-galactosidase B                               | NAGA    | P17050   | 6.84E-04 | 3.35E-03 | 1.57E-03 |
| CAK1 antigen                                        | MPF     | Q13421-2 | 9.40E-03 |          |          |
| Cystatin-6                                          | CST6    | Q15828   | 5.25E-11 | 1.18E-09 | 2.81E-07 |
| Ig kappa chain C region                             | IGKC    | P01834   | 1.28E-04 | 5.69E-04 | 1.22E-04 |
| Actin-depolymerizing factor                         | GSN     | P06396   | 5.13E-06 | 7.99E-05 | 2.05E-05 |
| Interleukin-1 receptor 3                            | C3orf13 | Q9NPH3-5 | 2.46E-04 | 2.75E-05 | 9.26E-03 |
| Ig kappa chain V-I region<br>EU                     |         | P01598   | 1.39E-03 | 6.48E-04 | 5.65E-03 |
| Ig gamma-1 chain C region                           | IGHG1   | P01857   | 9.33E-05 | 1.29E-04 | 3.01E-03 |
| Complement component 4A (Rodgers blood group)       | C4A     | B0UZ83   | 1.42E-03 | 9.22E-03 | 6.86E-04 |
| Corticosteroid-binding globulin                     | CBG     | P08185   | 9.41E-06 | 1.59E-05 | 5.88E-04 |
| Ig heavy chain V-III region GAL                     |         | P01781   | 2.48E-06 | 3.60E-04 | 2.96E-06 |
| Monocyte differentiation antigen CD14               | CD14    | P08571   | 5.10E-06 | 3.39E-05 | 7.77E-05 |
| Ig lambda chain V-III region LOI                    |         | P80748   | 3.14E-05 | 1.59E-04 | 3.96E-04 |
| Angiotensin I                                       | AGT     | P01019   | 4.80E-04 | 2.02E-03 | 3.20E-03 |
| Intestinal trefoil factor                           | ITF     | E9PBB5   | 7.40E-03 |          | 1.75E-03 |
| Ig heavy chain V-III region BUT                     |         | P01767   | 1.96E-03 | 2.30E-03 | 7.44E-03 |
| Ig kappa chain V-I region<br>AU                     |         | P01594   | 3.01E-04 | 3.37E-04 | 2.80E-03 |
| Fatty acid-binding protein 1                        | FABP1   | P07148   | 9.39E-04 | 3.47E-03 | 3.81E-03 |
| Cadherin family member 2                            | CDHF2   | F8W7U2   | 4.68E-08 | 2.09E-06 | 1.55E-06 |
| 7,8-dihydro-8-oxoguanine triphosphatase             | MTH1    | P36639   | 3.72E-03 | 9.53E-03 | 3.06E-03 |
| Protocadherin-12                                    | PCDH12  | Q9NPG4   | 6.04E-04 | 2.53E-03 | 1.09E-04 |
| Erythroid-potentiating activity                     | CLGI    | P01033   | 8.44E-03 |          | 2.21E-03 |
| Ig kappa chain V-I region<br>Ni                     |         | P01613   | 3.79E-03 | 1.93E-03 |          |
| Leu-enkephalin                                      | PENK    | P01210   | 1.29E-06 | 3.99E-06 | 7.17E-05 |
| Collectin placenta protein 1                        | CLP1    | Q5KU26   | 5.04E-05 | 9.20E-05 | 5.22E-04 |
| Ig heavy chain V-III region TIL                     |         | P01765   | 1.87E-04 | 2.88E-03 | 1.15E-03 |
| Ig kappa chain V-I region<br>Wes                    |         | P01611   | 1.10E-05 | 4.01E-05 | 5.91E-03 |
| Fc gamma-binding protein antigen                    | FCGBP   | Q9Y6R7   | 5.20E-05 | 8.37E-04 | 5.90E-04 |
| 45 kDa calcium-binding protein                      | CAB45   | Q9BRK5   | 3.52E-03 |          | 4.60E-04 |

|                                                         |         |        |          |          |          |
|---------------------------------------------------------|---------|--------|----------|----------|----------|
| Ig kappa chain V-II region<br>RPMI 6410                 |         | P06310 | 3.01E-06 | 1.41E-03 | 7.31E-09 |
| Cystatin-A                                              | CSTA    | P01040 | 5.14E-03 | 7.50E-03 |          |
| Calgranulin-B                                           | CAGB    | P06702 | 6.40E-05 | 9.75E-04 | 1.19E-03 |
| Putative uncharacterized<br>protein BST1                | BST1    | A6NC48 | 6.23E-07 | 4.35E-05 | 6.97E-05 |
| RAR-responsive protein<br>TIG1                          | RARRES1 | P49788 | 5.10E-06 | 6.49E-04 | 6.78E-05 |
| Beta-G1                                                 | GUSB    | P08236 | 1.24E-06 | 1.47E-04 | 2.80E-04 |
| ATL-derived factor                                      | TRDX    | P10599 | 6.64E-04 | 5.53E-03 | 5.53E-03 |
| Bactericidal/permeability-<br>increasing protein-like 1 | BPIL1   | Q8N4F0 | 1.07E-04 | 2.04E-03 | 2.04E-03 |
| 1-Cys peroxiredoxin                                     | AOP2    | P30041 | 1.26E-07 | 9.56E-05 | 1.25E-05 |
| Glypican-4                                              | GPC4    | O75487 | 7.06E-03 |          | 1.71E-03 |
| BMP and activin<br>membrane-bound<br>inhibitor homolog  | BAMBI   | Q13145 | 6.41E-03 | 1.60E-03 |          |
| Beta-mannosidase                                        | MANB1   | O00462 | 4.46E-03 | 1.56E-03 |          |
| 14 kDa thioredoxin-<br>related protein                  | TXNDC17 | Q9BRA2 | 7.12E-03 | 5.31E-03 |          |

**Supplementary Table 3.** Proteins differentially expressed in urines of SS and SR patients with respect to healthy subjects.

| Uniprot  | Protein Names                                                                 | Gene Names | average C | average SR | average SS | ANOVA p value | T test              | T test              | T test               |
|----------|-------------------------------------------------------------------------------|------------|-----------|------------|------------|---------------|---------------------|---------------------|----------------------|
|          |                                                                               |            |           |            |            |               | C-SR p value < 0.01 | C-SS p value < 0.01 | SR-SS p value < 0.05 |
| Q14508   | Epididymal secretory protein E4                                               | HE4        | 10687200  | 25234500   | 28727200   | 5.49E-07      | +                   | +                   |                      |
| P05067   | Amyloid beta A4 protein                                                       | A4         | 1647730   | 2413870    | 2711590    | 5.67E-06      | +                   | +                   |                      |
| E9PEA4   | Uromodulin                                                                    | UMOD       | 203406000 | 654286000  | 745013000  | 1.71E-06      | +                   | +                   |                      |
| P05154   | Protein C inhibitor;Serpins A5                                                | PCI        | 1672740   | 4151090    | 2980300    | 8.14E-05      | +                   | +                   |                      |
| P01133   | Epidermal growth factor                                                       | EGF        | 17270000  | 27384700   | 27532100   | 1.80E-04      | +                   | +                   |                      |
| P10643   | Complement component C7                                                       | C7         | 989433    | 1562820    | 1527440    | 1.12E-03      | +                   | +                   |                      |
| P11717   | 300 kDa mannose 6-phosphate receptor                                          | IGF2R      | 3161.78   | 50814.2    | 60786      | 5.68E-04      | +                   | +                   |                      |
| Q8NHP8   | Phospholipase B domain-containing protein 2                                   | PLBD2      | 78062.1   | 128132     | 170912     | 6.85E-05      | +                   | +                   |                      |
| Q96J84-2 | Nephrin 1                                                                     | KIRREL     | 69860.6   | 101682     | 126063     | 4.97E-04      | +                   | +                   | +                    |
| B9ZVU6   | Butyrophilin subfamily 2 member A1                                            | BTN2A1     | 2030540   | 3192960    | 2784120    | 4.42E-04      | +                   | +                   |                      |
| Q92956   | Tumor necrosis factor receptor superfamily member 14                          | HVEA       | 1519080   | 2132660    | 2387770    | 9.59E-04      | +                   | +                   |                      |
| Q9ULI3   | Protein HEG homolog 1                                                         | HEG1       | 174336    | 299069     | 445843     | 2.95E-04      | +                   | +                   |                      |
| P08138   | Gp80-LNGFR;Low affinity neurotrophin receptor p75NTR                          | NGFR       | 1658880   | 2625050    | 3024760    | 2.84E-03      | +                   | +                   |                      |
| P49913   | 18 kDa cationic antimicrobial protein                                         | CAMP       | 22708.4   | 60737.2    | 80544.7    | 8.59E-04      | +                   | +                   |                      |
| P40121   | Actin regulatory protein CAP-G                                                | AFCP       | 1865.74   | 27820.2    | 25444.6    | 3.58E-03      | +                   | +                   |                      |
| P98160   | Basement membrane-specific heparan sulfate proteoglycan core protein;Perlecan | HSPG2      | 55720800  | 45340300   | 45894700   | 3.95E-03      | +                   | +                   |                      |
| P01871-2 | Ig mu chain C region                                                          | IGHM       | 1822730   | 744996     | 109178     | 3.10E-09      | +                   | +                   | +                    |
| P06310   | Ig kappa chain V-II region RPMI 6410                                          |            | 818128    | 414822     | 207229     | 3.01E-06      | +                   | +                   |                      |
| Q969P0   | CD81 partner 3                                                                | CD81P3     | 1905540   | 1365510    | 1105210    | 2.02E-05      | +                   | +                   |                      |
| Q15828   | Cystatin-6                                                                    | CST6       | 3411430   | 1466690    | 1824310    | 5.25E-11      | +                   | +                   |                      |
| F8W7U2   | Cadherin family member 2                                                      | CDHF2      | 1196790   | 438179     | 488400     | 4.68E-08      | +                   | +                   |                      |
| P01609   | Ig kappa chain V-I region Scw                                                 |            | 239737    | 55605.6    | 109614     | 1.26E-12      | +                   | +                   | +                    |
| P01781   | Ig heavy chain V-III region GAL                                               |            | 831979    | 538298     | 404472     | 2.48E-06      | +                   | +                   |                      |

|        |                                                                   |         |           |           |           |          |   |   |   |
|--------|-------------------------------------------------------------------|---------|-----------|-----------|-----------|----------|---|---|---|
| P30041 | 1-Cys peroxiredoxin, Acidic calcium-independent phospholipase A2; | AOP2    | 73191.2   | 8733.56   | 0         | 1.26E-07 | + | + |   |
| P01593 | Ig kappa chain V-I region AG                                      |         | 3007510   | 1797530   | 1709160   | 2.48E-05 | + | + |   |
| P06396 | Gelsolin                                                          | GSN     | 15575400  | 7582180   | 8143730   | 5.13E-06 | + | + |   |
|        | RAR-responsive protein                                            |         |           |           |           |          |   |   |   |
| P49788 | TIG1;Tazarotene-induced gene 1 protein                            | RARRES1 | 125168    | 26013.1   | 7851.19   | 5.10E-06 | + | + |   |
| A6NC48 | Putative uncharacterized protein                                  |         |           |           |           |          |   |   |   |
|        | BST1                                                              | BST1    | 77576.6   | 9113.33   | 10639     | 6.23E-07 | + | + |   |
| P01210 | Leu-enkephalin                                                    | PENK    | 86802.6   | 21782.1   | 29279.8   | 1.29E-06 | + | + |   |
| P08571 | Monocyte differentiation antigen                                  |         |           |           |           |          |   |   |   |
|        | CD14                                                              | CD14    | 9894330   | 5230700   | 4538340   | 5.10E-06 | + | + |   |
| P01764 | Ig heavy chain V-III region VH26                                  |         | 633000    | 410081    | 323138    | 1.56E-05 | + | + | + |
| Q9NPG4 | Vascular cadherin-2                                               | PCDH12  | 170943    | 81089.1   | 67593.4   | 6.04E-04 | + | + |   |
| P01834 | Ig kappa chain C region                                           | IGKC    | 196873000 | 115090000 | 105165000 | 1.28E-04 | + | + |   |
| P01130 | Low-density lipoprotein receptor                                  | LDLR    | 32075.9   | 8096.3    | 0         | 5.80E-05 | + | + | + |
| P08236 | Beta-glucuronidase                                                | GUSB    | 270487    | 0         | 13409     | 1.24E-06 | + | + |   |
| P80748 | Ig lambda chain V-III region LOI                                  |         | 4633150   | 2193790   | 2113390   | 3.14E-05 | + | + |   |
| Q5KU26 | Collectin placenta protein 1                                      | CLP1    | 437385    | 149447    | 141824    | 5.04E-05 | + | + |   |
| P08185 | Transcortin                                                       | CBG     | 587858    | 231867    | 290087    | 9.41E-06 | + | + |   |
| Q9Y6R7 | Fcgamma-binding protein antigen                                   | FCGBP   | 1043850   | 313846    | 276794    | 5.20E-05 | + | + |   |
| B0UZ83 | Complement component 4A                                           | C4A     | 819324    | 504756    | 407431    | 1.42E-03 | + | + |   |
| P31025 | Lipocalin-1                                                       | LCN1    | 557982    | 127465    | 238994    | 1.54E-06 | + | + | + |
| P01765 | Ig heavy chain V-III region TIL                                   |         | 1778340   | 694560    | 570923    | 1.87E-04 | + | + |   |
| P06702 | Calgranulin-B                                                     | CAGB    | 181236    | 22628.1   | 27001.9   | 6.40E-05 | + | + |   |
| B5MDX4 | Plasma glutamate carboxypeptidase                                 | PGCP    | 273490    | 187818    | 152118    | 5.76E-04 | + | + |   |
| P17050 | Alpha-galactosidase B                                             | NAGA    | 188340    | 132043    | 104600    | 6.84E-04 | + | + |   |
| P01594 | Ig kappa chain V-I region AU                                      |         | 175775    | 58481     | 74555.1   | 3.01E-04 | + | + |   |
| P01857 | Ig gamma-1 chain C region                                         | IGHG1   | 30536400  | 13989500  | 15389600  | 9.33E-05 | + | + |   |
| P36639 | Nucleoside diphosphate-linked moiety X motif 1                    | MTH1    | 57059.2   | 32445.1   | 23160.7   | 3.72E-03 | + | + |   |
| P01019 | Angiotensin family                                                | AGT     | 791485    | 386492    | 353554    | 4.80E-04 | + | + |   |
| P07148 | Fatty acid-binding protein 1                                      | FABP1   | 381225    | 176389    | 159571    | 9.39E-04 | + | + |   |
| P01009 | Serpin A1                                                         | AAT     | 13043800  | 10530000  | 8743900   | 2.61E-03 | + | + |   |
| P01598 | Ig kappa chain V-I region EU                                      |         | 243488    | 147546    | 125403    | 1.39E-03 | + | + |   |
| P01611 | Ig kappa chain V-I region Wes                                     |         | 54182.9   | 0         | 14642.9   | 1.10E-05 | + | + |   |



|          |                                 |         |          |         |         |          |   |   |
|----------|---------------------------------|---------|----------|---------|---------|----------|---|---|
| P01767   | Ig heavy chain V-III region BUT |         | 482204   | 177843  | 210850  | 1.96E-03 | + | + |
| P01860   | Heavy chain disease protein     | IGHG3   | 10069800 | 4513020 | 5642250 | 1.77E-04 | + | + |
| Q9NPH3-5 | Interleukin-1 receptor 3        | C3orf13 | 160280   | 56101.9 | 83675   | 2.46E-04 | + | + |

List of the proteins that are significant both from the ANOVA test among the SS, SR and C groups and from the T test between SR vs C and SS vs C. Some of them are further significant upon T test between SS vs SR groups. + indicates proteins with a significant P value. The up-regulated proteins are colored in red, while in blue are the down regulated ones.

**Supplementary Table 4.** Proteins differentially expressed in urines of SS patients with respect to healthy and SR subjects.

| Uniprot  | Protein Names                             | Gene Names | average C | average Sr | average SS | ANOVA p value | T test C-SR p value < 0.01 | T test C-SS p value < 0.01 | T test SR-SS p value < 0.05 |
|----------|-------------------------------------------|------------|-----------|------------|------------|---------------|----------------------------|----------------------------|-----------------------------|
| P19022   | Cadherin-2                                | CDH2       | 834360    | 983067     | 1290010    | 1.49E-04      |                            | +                          | +                           |
| B2ZZ83   | Filamin B                                 | FLNB       | 70385.1   | 64416.2    | 171292     | 2.36E-05      |                            | +                          | +                           |
| Q96J84-2 | Nephrin 1                                 | KIRREL     | 69860.6   | 101682     | 126063     | 4.97E-04      | +                          | +                          | +                           |
| P48745   | CCN family member 3                       | CCN3       | 2945760   | 3102160    | 4289030    | 1.43E-04      |                            | +                          | +                           |
| Q8NDA2   | Hemicentin-2                              | HMCN2      | 145006    | 105602     | 239112     | 6.43E-05      |                            | +                          | +                           |
| P68871   | Beta-globin                               | HBB        | 727191    | 913361     | 3094950    | 5.80E-05      |                            | +                          | +                           |
| P55000   | Anti-neoplastic urinary protein           | ARS        | 6684520   | 6536890    | 11918000   | 9.11E-04      |                            | +                          | +                           |
| P69905   | Alpha-globin                              | HBA1       | 372101    | 524845     | 2337730    | 2.23E-04      |                            | +                          | +                           |
| P51688   | Sulphamidase                              | HSS        | 15104     | 0          | 85402.2    | 1.92E-05      |                            | +                          | +                           |
| Q4LDE5   | CCP module-containing protein 22          | C9orf13    | 0         | 0          | 124458     | 2.59E-06      |                            | +                          | +                           |
| P01871-2 | Ig mu chain C region                      | IGHM       | 1822730   | 744996     | 109178     | 3.10E-09      | +                          | +                          | +                           |
| Q96NY8   | Nectin-4                                  | LNIR       | 902834    | 1000230    | 342213     | 1.67E-11      |                            | +                          | +                           |
| Q12907   | Vesicular integral-membrane protein VIP36 | C5orf8     | 21902500  | 16990900   | 12191400   | 9.44E-06      |                            | +                          | +                           |
| P23284   | Cyclophilin B                             | CYPB       | 86575.4   | 62030.9    | 4853.24    | 4.34E-06      |                            | +                          | +                           |
| Q92692   | Nectin-2                                  | HVEB       | 1174040   | 972492     | 687108     | 3.89E-05      |                            | +                          | +                           |
| Q9UN70   | Protocadherin-2                           | PCDH2      | 315067    | 262459     | 167233     | 3.21E-04      |                            | +                          | +                           |
| P01609   | Ig kappa chain V-I region Scw             |            | 239737    | 55605.6    | 109614     | 1.26E-12      | +                          | +                          | +                           |

|          |                                             |          |          |          |         |          |   |   |   |
|----------|---------------------------------------------|----------|----------|----------|---------|----------|---|---|---|
| P08582   | Melanotransferrin                           | MAP97    | 1419330  | 1046850  | 482125  | 2.25E-05 |   | + | + |
| Q92520   | Protein FAM3C                               | FAM3C    | 194087   | 187310   | 82743.4 | 7.28E-05 |   | + | + |
| Q06830   | Peroxiredoxin-1                             | PAGA     | 130270   | 122666   | 23097.6 | 1.80E-04 |   | + | + |
| O75594   | Peptidoglycan recognition<br>protein 1      | PGLYRP   | 13791100 | 12718500 | 7112320 | 1.74E-03 |   | + | + |
| P61769   | Beta-2-microglobulin                        | B2M      | 4262030  | 3556140  | 1973610 | 3.71E-05 |   | + | + |
| P53634   | Cathepsin C                                 | CPPI     | 698695   | 541780   | 287028  | 3.29E-05 |   | + | + |
| P12109   | Collagen alpha-1(VI) chain                  | COL6A1   | 4651830  | 4450430  | 2785390 | 1.03E-05 |   | + | + |
| P15144   | Alanyl aminopeptidase                       | ANPEP    | 4595820  | 4871130  | 2986940 | 1.85E-05 |   | + | + |
| O95336   | 6-phosphogluconolactonase                   | PGLS     | 945914   | 869450   | 514002  | 7.51E-05 |   | + | + |
| P01764   | Ig heavy chain V-III region<br>VH26         |          | 633000   | 410081   | 323138  | 1.56E-05 | + | + | + |
| P14543   | Nidogen-1                                   | NID      | 5534320  | 4591030  | 3224710 | 1.33E-05 |   | + | + |
| P16870   | Carboxypeptidase E                          | CPE      | 503569   | 664615   | 260305  | 2.02E-07 |   | + | + |
| P61970   | Nuclear transport factor 2                  | NTF2     | 2865490  | 2598890  | 1497850 | 5.93E-05 |   | + | + |
| P01130   | Low-density lipoprotein<br>receptor         | LDLR     | 32075.9  | 8096.3   | 0       | 5.80E-05 | + | + | + |
| Q8WZ75   | Roundabout homolog 4                        | ROBO4    | 3924980  | 4146660  | 2282100 | 6.17E-04 |   | + | + |
| Q07075   | Aminopeptidase A                            | ENPEP    | 443876   | 363794   | 177483  | 7.25E-04 |   | + | + |
| P54802   | Alpha-N-<br>acetylglucosaminidase           | NAGLU    | 1860100  | 1502570  | 1047700 | 2.60E-04 |   | + | + |
| P15309   | Prostatic acid phosphatase                  | ACPP     | 7477940  | 7717390  | 3890110 | 5.38E-05 |   | + | + |
| P01766   | Ig heavy chain V-III region<br>BRO          |          | 4309780  | 3018010  | 1577890 | 2.76E-03 |   | + | + |
| Q08345-5 | Cell adhesion kinase                        | CAK      | 28252.2  | 29754.2  | 2090.57 | 2.23E-03 |   | + | + |
| P01591   | Immunoglobulin J chain                      | IGCJ     | 3606150  | 4330490  | 2510860 | 7.06E-04 |   | + | + |
| P19440   | Gamma-glutamyltransferase 1                 | GGT      | 860472   | 1275160  | 519616  | 1.06E-07 | + | + | + |
| P31025   | Lipocalin-1                                 | LCN1     | 557982   | 127465   | 238994  | 1.54E-06 | + | + | + |
| P16278   | Acid beta-galactosidase                     | ELNR1    | 1876400  | 1411530  | 831314  | 2.59E-03 |   | + | + |
| Q86T13   | Epidermal growth factor<br>receptor 5       | C14orf27 | 206510   | 170283   | 94397.6 | 4.41E-03 |   | + | + |
| Q6UVK1   | Chondroitin sulfate<br>proteoglycan 4       | CSPG4    | 2117460  | 1989790  | 1408460 | 8.51E-04 |   | + | + |
| O75503   | Ceroid-lipofuscinosis neuronal<br>protein 5 | CLN5     | 25310.2  | 28735.6  | 0       | 5.51E-03 |   | + | + |
| Q99988   | Growth/differentiation factor               | GDF15    | 45900.2  | 54694.4  | 8766.43 | 1.94E-03 |   | + | + |

|        |                                                 |        |         |         |         |          |   |   |
|--------|-------------------------------------------------|--------|---------|---------|---------|----------|---|---|
| P05109 | Calgranulin-A                                   | CAGA   | 63706.7 | 30951.5 | 0       | 7.73E-03 | + | + |
| P07288 | Kallikrein-3                                    | APS    | 6344130 | 6527100 | 3503180 | 5.88E-03 | + | + |
| P16444 | Dehydropeptidase-I                              | DPEP1  | 883913  | 882054  | 434238  | 3.71E-03 | + | + |
| B7ZKJ8 | inter-alpha-trypsin inhibitor<br>heavy chain H4 | ITIH4  | 7657560 | 4334620 | 2537050 | 4.54E-03 | + | + |
| P50895 | Auberger B antigen                              | BCAM   | 592655  | 645221  | 375206  | 2.60E-03 | + | + |
| P09211 | Glutathione S-transferase P                     | FAEES3 | 180927  | 264341  | 77522   | 1.45E-03 | + | + |

List of the proteins that are significantly regulated in salt sensitive hypertensive patients both from the ANOVA test among the SS, SR and C groups than from the T test between both SS vs C and SS vs SR. + indicates proteins with a significant P value .

**Supplementary Table 5.** Proteins differentially expressed in the urines of SR patients with respect to healthy and SS subjects.

| Uniprot | Protein Names                                       | Gene Names | average C | average SR | average SS | ANOVA p value | T test C-         | T test C-         | T test SR-        |
|---------|-----------------------------------------------------|------------|-----------|------------|------------|---------------|-------------------|-------------------|-------------------|
|         |                                                     |            |           |            |            |               | SR p value < 0.01 | SS p value < 0.01 | SS p value < 0.05 |
| O60494  | Cubilin                                             | CUBN       | 9108300   | 15471300   | 10299100   | 1.09E-06      | +                 |                   | +                 |
| P56537  | Eukaryotic translation initiation factor 6;p27(BBP) | EIF3A      | 713612    | 1163410    | 773913     | 2.08E-06      | +                 |                   | +                 |
| P62937  | Cyclophilin A                                       | CYPA       | 240043    | 426806     | 274554     | 5.14E-05      | +                 |                   | +                 |
| P02649  | Apolipoprotein E                                    | APOE       | 502791    | 1026850    | 585406     | 3.02E-05      | +                 |                   | +                 |
| Q9H6Y7  | E3 ubiquitin-protein ligase RNF167                  | LP2254     | 76992.2   | 302179     | 98648.5    | 4.06E-05      | +                 |                   | +                 |
| P16083  | NRH dehydrogenase [quinone] 2                       | NMOR2      | 3236.56   | 44370.3    | 0          | 1.34E-07      | +                 |                   | +                 |
| Q7Z5L0  | Vitelline membrane outer layer protein 1 homolog    | UNQ6350    | 5848860   | 12107900   | 7728730    | 4.89E-05      | +                 |                   | +                 |
| P11117  | Lysosomal acid phosphatase                          | ACP2       | 1467260   | 2680610    | 1073950    | 1.12E-07      | +                 |                   | +                 |
| Q7Z7M0  | Epidermal growth factor-like protein 4              | C19orf49   | 47322.7   | 127027     | 63362.5    | 1.70E-04      | +                 |                   | +                 |
| P98164  | Megalyn                                             | LRP2       | 9430350   | 13185600   | 9514830    | 1.82E-04      | +                 |                   | +                 |
| F2Z2J9  | Phosphoglycerate mutase 1                           | CDABP0006  | 0         | 36981.1    | 5042.67    | 4.18E-05      | +                 |                   | +                 |
| Q9BVM4  | Gamma-glutamylaminocyclotransferase                 | A2LD1      | 110565    | 184548     | 60791.4    | 1.89E-04      | +                 |                   | +                 |

|               |                                                                  |             |               |               |               |                 |          |   |          |
|---------------|------------------------------------------------------------------|-------------|---------------|---------------|---------------|-----------------|----------|---|----------|
| P06733        | Alpha-enolase                                                    | ENO1        | 387013        | 789043        | 276908        | 1.75E-05        | +        |   | +        |
| P19440        | Gamma-glutamyltransferase 1                                      | GGT         | 860472        | 1275160       | 519616        | 1.06E-07        | +        | + | +        |
| Q96924        | Receptor expressed in lymphoid tissues                           | RELT        | 99788.2       | 163820        | 97417.5       | 9.20E-04        | +        |   | +        |
| <b>A8KAH5</b> | <b>Increased sodium tolerance 1</b>                              | <b>IST1</b> | <b>142782</b> | <b>326882</b> | <b>138294</b> | <b>8.83E-04</b> | <b>+</b> |   | <b>+</b> |
| E7EX29        | Protein kinase C inhibitor protein 1                             | YWHAZ       | 118537        | 247597        | 89576.4       | 1.78E-04        | +        |   | +        |
| P33908        | Man(9)-alpha-mannosidase                                         | MAN1A1      | 190392        | 440530        | 207286        | 6.58E-04        | +        |   | +        |
| P22792        | Carboxypeptidase N                                               | ACBP        | 805257        | 1067150       | 629328        | 1.40E-04        | +        |   | +        |
| Q12913        | Density-enhanced phosphatase 1                                   | DEP1        | 185248        | 293859        | 160737        | 2.76E-03        | +        |   | +        |
| Q96KP4        | Peptidase A                                                      | CN2         | 104461        | 272093        | 85360.5       | 3.60E-04        | +        |   | +        |
| P62258        | 14-3-3 protein epsilon                                           | YWHAE       | 118441        | 294041        | 79518.9       | 1.68E-04        | +        |   | +        |
| P11142        | Heat shock 70 kDa protein 8                                      | HSC70       | 110468        | 215735        | 84544         | 4.89E-04        | +        |   | +        |
| P13489        | Placental ribonuclease inhibitor                                 | PRI         | 7637.56       | 33906.1       | 0             | 8.79E-05        | +        |   | +        |
| O75015        | Fc-gamma RIII-beta                                               | CD16B       | 2862.07       | 15064.7       | 273.648       | 1.91E-04        | +        |   | +        |
| P05062        | Fructose-bisphosphate aldolase B                                 | ALDB        | 788532        | 1668180       | 497957        | 2.07E-04        | +        |   | +        |
| P60174        | Triose-phosphate isomerase                                       | TPI         | 228846        | 354809        | 198067        | 2.83E-03        | +        |   | +        |
| Q8NBJ4        | Golgi phosphoprotein 2                                           | C9orf155    | 2664270       | 3485860       | 2410920       | 1.47E-03        | +        |   | +        |
| E9PDW4        | Kidney-specific Na-K-Cl symporter                                | NKCC2       | 10018.074     | 31662         | 0             | 2.00E-04        | +        |   | +        |
| P11279        | Lysosome-associated membrane glycoprotein 1                      | LAMP1       | 1442830       | 2890410       | 2081080       | 2.26E-05        | +        |   | +        |
| P10253        | Lysosomal alpha-glucosidase                                      | GAA         | 8808160       | 13659800      | 10517700      | 7.43E-05        | +        |   | +        |
| E7ETH0        | Complement factor I                                              | CFI         | 693618        | 1153770       | 764619        | 2.66E-04        | +        |   | +        |
| Q9HBB8        | Cadherin-related family member 5                                 | CDHR5       | 42840.4       | 157852        | 86984.7       | 2.70E-04        | +        |   | +        |
| P29323        | Ephrin type-B receptor 2                                         | DRT         | 3038.15       | 31176.4       | 13283         | 2.59E-04        | +        |   | +        |
| G3V1C5        | Interleukin-18-binding protein                                   | IL18BP      | 657628        | 1110960       | 787307        | 6.08E-04        | +        |   | +        |
| A6NI73        | CD85 antigen-like family member F                                | ILT11       | 177636        | 305699        | 194314        | 3.41E-03        | +        |   | +        |
| Q9HD89        | Adipose tissue-specific secretory factor                         | FIZZ3       | 545418        | 777524        | 580260        | 4.70E-03        | +        |   | +        |
| P21810        | Biglycan                                                         | BGN         | 262725        | 411524        | 290840        | 1.63E-03        | +        |   | +        |
| Q9NP79        | Vacuolar protein sorting-associated protein VTA1 homolog         | C6orf55     | 1549          | 64221.7       | 12513.9       | 6.42E-04        | +        |   | +        |
| Q01459        | Di-N-acetylchitobiase                                            | CTB         | 680619        | 450213        | 928955        | 3.59E-05        | +        |   | +        |
| Q9H6X2        | Anthrax toxin receptor 1                                         | ANTXR1      | 178947        | 59506.1       | 168879        | 3.10E-06        | +        |   | +        |
| P55285        | Cadherin-6                                                       | CDH6        | 117824        | 41564.6       | 134877        | 5.13E-05        | +        |   | +        |
| P78552        | Cancer/testis antigen 19;Interleukin-13 receptor subunit alpha-1 | IL13R       | 20987.1       | 3329.37       | 37562.2       | 5.19E-04        | +        |   | +        |

|          |                                                          |          |          |         |          |          |   |   |   |
|----------|----------------------------------------------------------|----------|----------|---------|----------|----------|---|---|---|
| E7E566   | Antigen CD42b-alpha                                      | GP1BA    | 31893.2  | 0       | 17734.1  | 2.13E-05 | + |   | + |
| Q9NP80   | Calcium-independent phospholipase A2-gamma               | BM-043   | 73581    | 10999.3 | 99534.8  | 1.61E-03 | + |   | + |
| O00468   | Agrin                                                    | AGRIN    | 2178220  | 1155250 | 1742900  | 1.02E-05 | + |   | + |
| Q6UXB8   | Cysteine-rich secretory protein 9                        | CRISP9   | 3502090  | 1471930 | 4233440  | 3.78E-04 | + |   | + |
| Q14766-4 | Latent-transforming growth factor beta-binding protein 1 | LTBP1    | 250155   | 66001.6 | 212013   | 1.13E-04 | + |   | + |
| P14151   | CD62 antigen-like family member L                        | LNHR     | 36592    | 6687.52 | 40673.9  | 6.07E-03 | + |   | + |
| O94919   | Endonuclease domain-containing 1 protein                 | ENDOD1   | 4548390  | 2936060 | 4248800  | 6.63E-04 | + |   | + |
| P05451   | Lithostathine-1-alpha                                    | PSPS     | 7763280  | 3150340 | 7828250  | 3.84E-04 | + |   | + |
| P01871-2 | Ig mu chain C region                                     | IGHM     | 1822730  | 744996  | 109178   | 3.10E-09 | + | + | + |
| P01609   | Ig kappa chain V-I region Scw                            |          | 239737   | 55605.6 | 109614   | 1.26E-12 | + | + | + |
| F5H0Q5   | Alpha-2-HS-glycoprotein                                  | AHSG     | 19267800 | 9245760 | 14166800 | 2.57E-05 | + |   | + |
| Q9NNX6   | CD209 antigen                                            | CD209    | 75859.6  | 11387.9 | 48267.9  | 1.96E-05 | + |   | + |
| P04433   | Ig kappa chain V-III region VG                           |          | 6247100  | 3041310 | 4474860  | 4.25E-05 | + |   | + |
| P31025   | Lipocalin-1                                              | LCN1     | 557982   | 127465  | 238994   | 1.54E-06 | + | + | + |
| P02452   | Alpha-1 type I collagen                                  | COL1A1   | 197324   | 76273.5 | 159137   | 4.48E-04 | + |   | + |
| Q96AP7   | Endothelial cell-selective adhesion molecule             | ESAM     | 136797   | 23986.9 | 88167.5  | 6.96E-04 | + |   | + |
| Q9H9P2   | Chondrolectin                                            | C21orf68 | 27507.7  | 0       | 28397.9  | 9.23E-03 | + |   | + |
| P01130   | Low-density lipoprotein receptor                         | LDLR     | 32075.9  | 8096.3  | 0        | 5.80E-05 | + | + | + |

List of the proteins that are significantly regulated in salt resistant hypertensive patients both from the ANOVA test among the SS, SR and C groups than from the T test between SR vs C and SR vs SS. + indicates significant proteins.

## SUPPLEMENTARY FIGURES

**Supplementary Fig. 1.** Histogram representing the number of identified proteins from a single donor (A). Experimental design. (B). Spearman correlation of the intensities of all the proteins identified in all the samples analyzed (C).

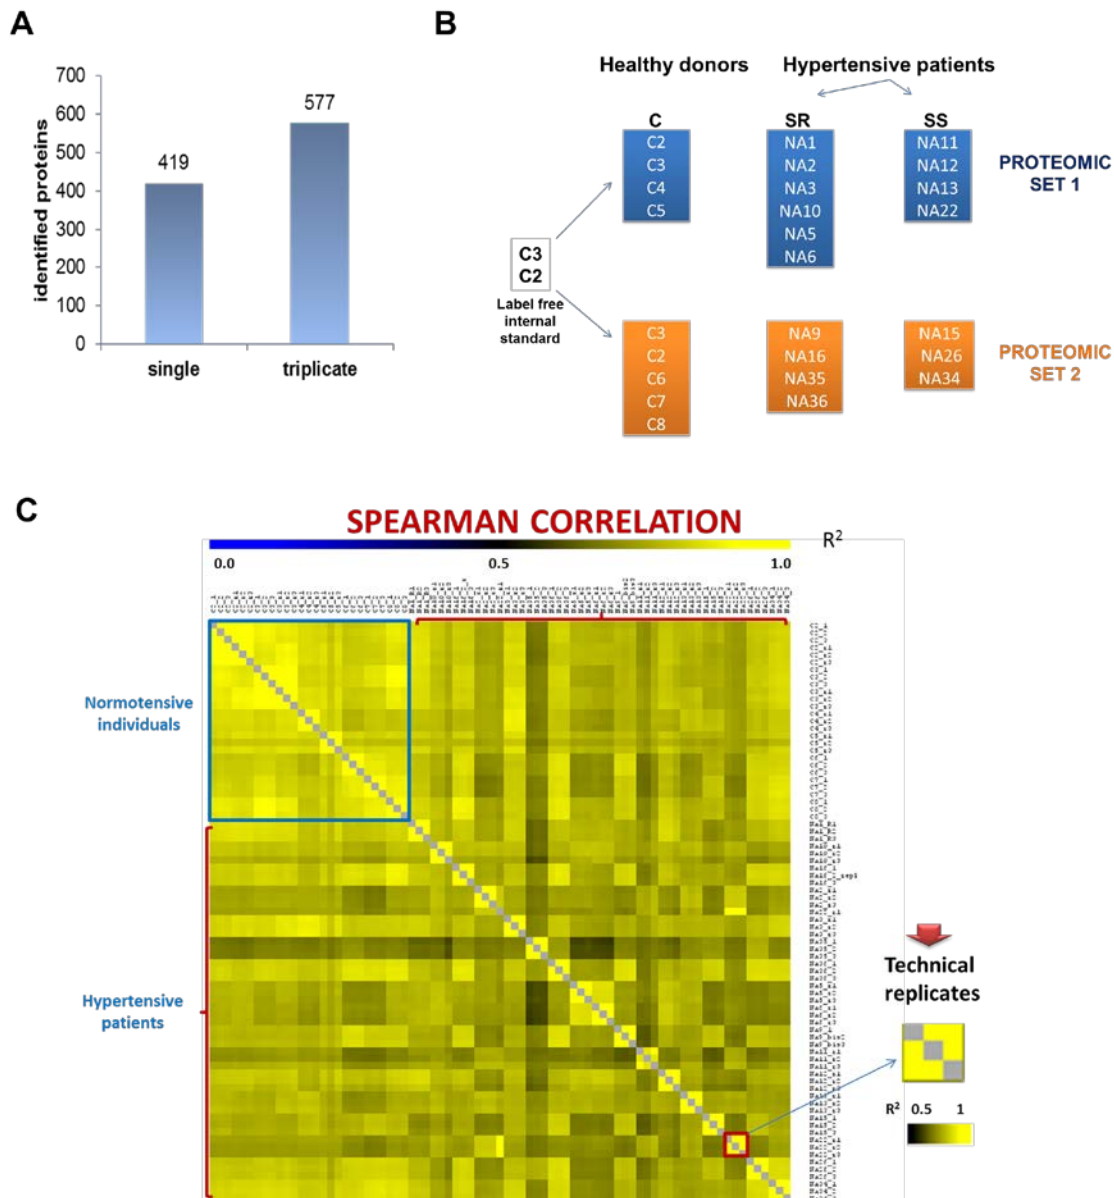

Panel A: Histogram representing the number of identified proteins upon single or triplicate LC-MS/MS runs. Panel B: Experimental design. List of subjects analyzed by proteomic technique for the first and second set. Panels C: Spearman correlation of the intensities of all the proteins identified in all the samples analyzed including the three technical replicates.

**Supplementary Fig. 2.** Venn diagram of the uniprot IDs of the proteins identified (A). GO cellular component enrichment analysis (B).

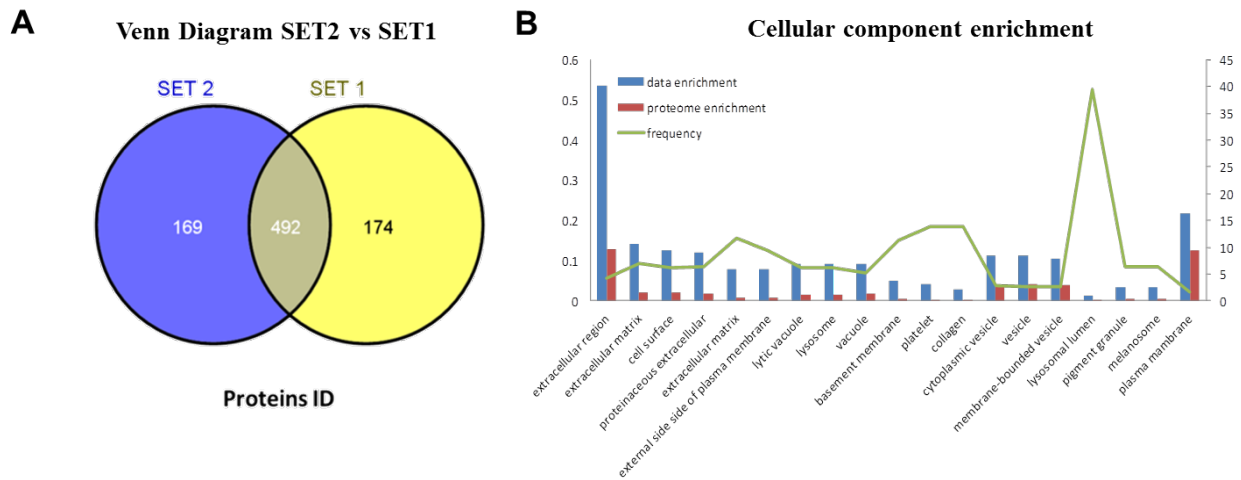

Panel A: Venn diagram of the uniprot IDs of the proteins identified in the first SET vs second SET.

Panel B: GO cellular component enrichment analysis. Significantly over-represented GO cellular component terms for the urinary proteins identified in the entire dataset ( $p$  value  $< 0.01$ ). This set of proteins was compared with the entire list of UniProtKB/Swiss-Prot. The ratio shown is the number of the urinary proteins identified over the entire UniProtKB/Swiss-Prot proteins annotated to each GO term.

**Supplementary Fig. 3.** Effect of the normalization on the total intensities for each sample in the entire dataset (A). Scatter plot of intensities averaged among the three groups: SS, SR and C for each protein identified (B). Plot of the ratios of proteins intensities for SS/C vs SR/C (C).

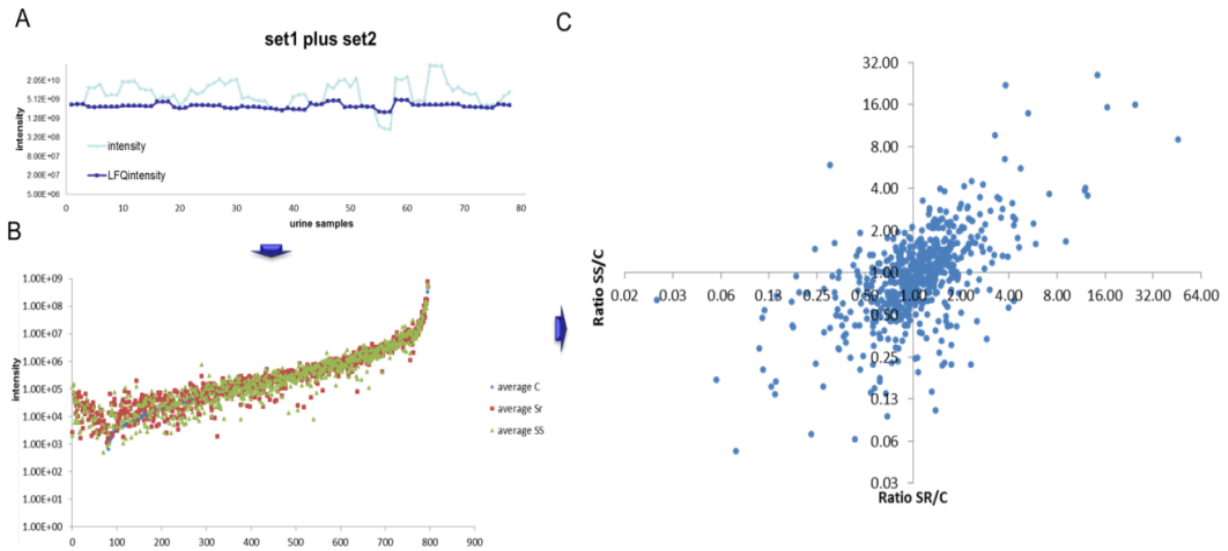

Panel A shows the effect of the normalization on the total intensities for each sample in the entire dataset (comparison of the summed intensities and normalized label free LFQ intensities of all the proteins per sample). Panel B Scatter plot of intensities averaged among the three groups: SS, SR and C for each protein identified. This plot gives an indication of the relative abundance of a given protein among the groups. Panel C: the ratios of proteins intensities are plotted for SS/C vs SR/C in order to follow the behavior of protein abundances of the patients vs healthy donors. The majority of these ratios show the same profile, precisely the majority of the proteins up regulated in SS patients are also up regulated in SR patients and vice versa.



**Supplementary Fig. 4.** KEGG pathway analysis of the significantly modulated proteins.

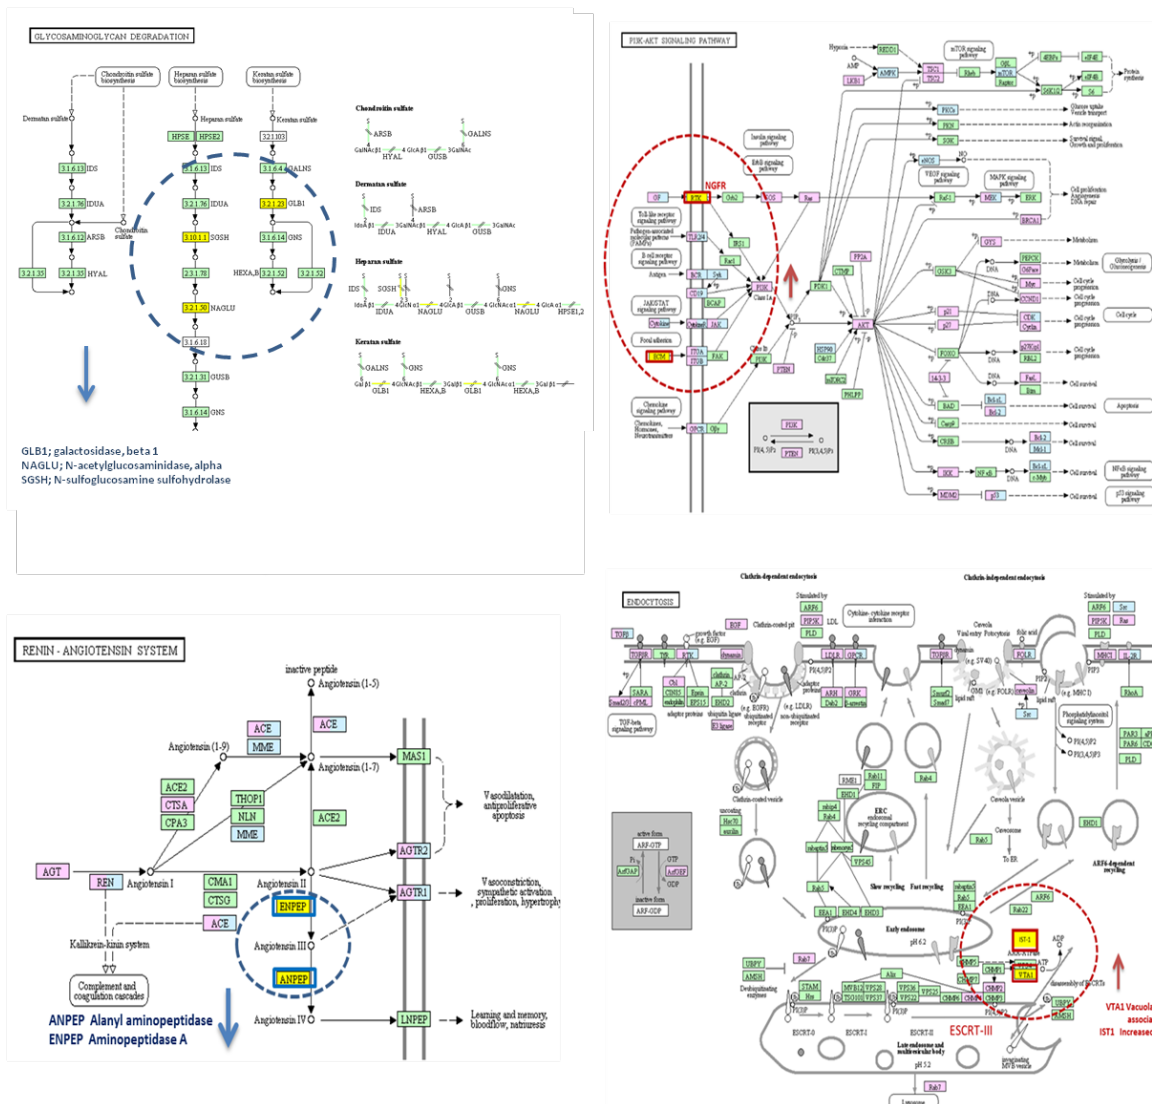

Proteins found modulated were underlined. The down-regulated proteins are circled in blue while the up-regulated ones are circled in red.



**Supplementary Fig. 6.** Analysis of the modulated proteins already published as biomarkers candidates in urine.

## Urinary Protein Biomarker Database

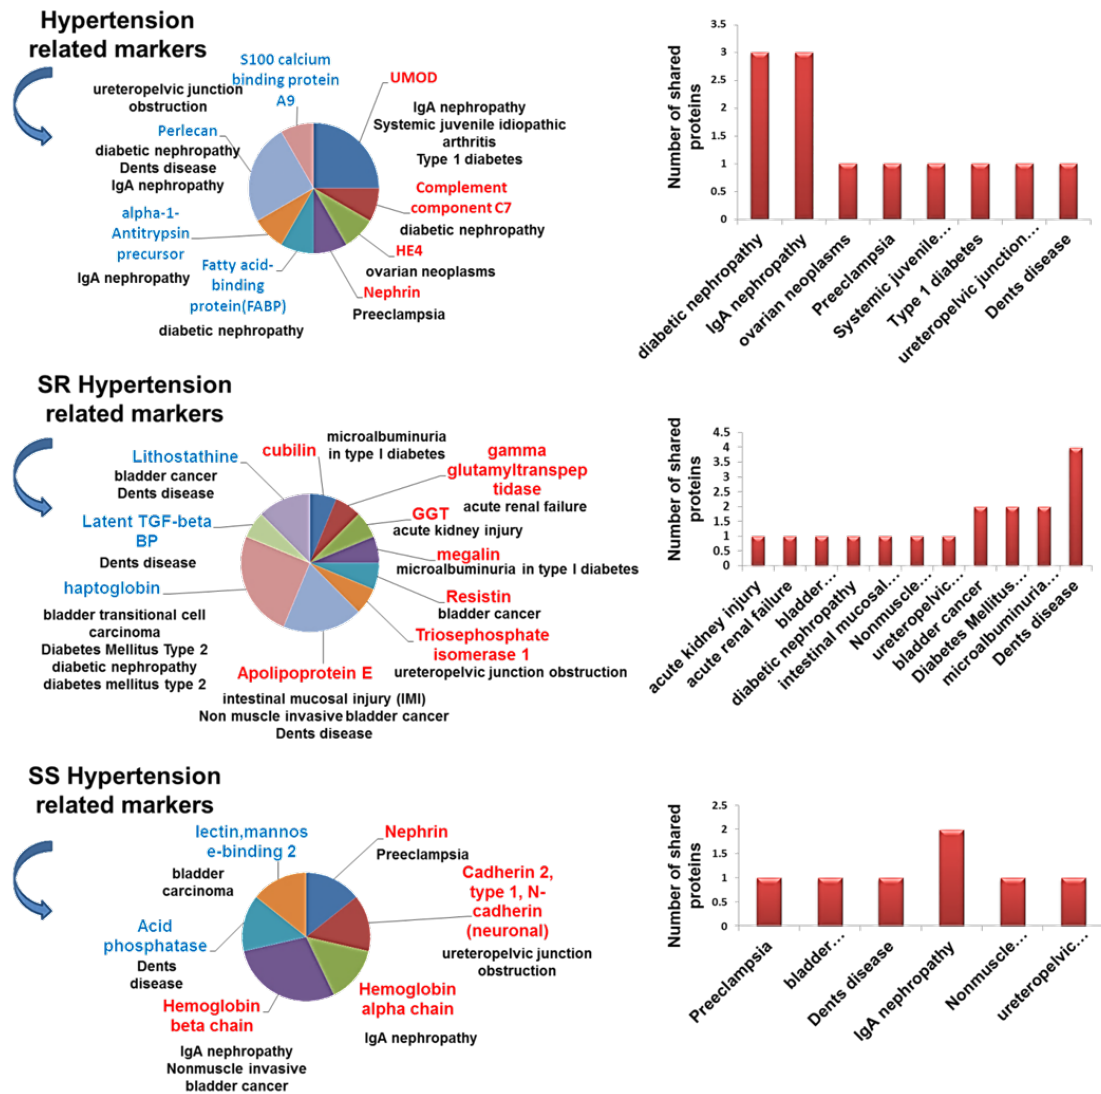

The Urinary Proteins Biomarker Database was queried. (Left panels) Pie charts of the up regulated (red colored) and down regulated (blue colored) proteins found in the database with their associated pathologies. (Right panels) Histograms in terms of number of proteins matched in the database which share the same pathology are depicted for the three groups of subjects as indicated.

**Supplementary Fig. 7.** Validation by WB analysis of nephrin1 and uromodulin on a larger cohort of patients (19 healthy donors, 16 SR and 15 SS)

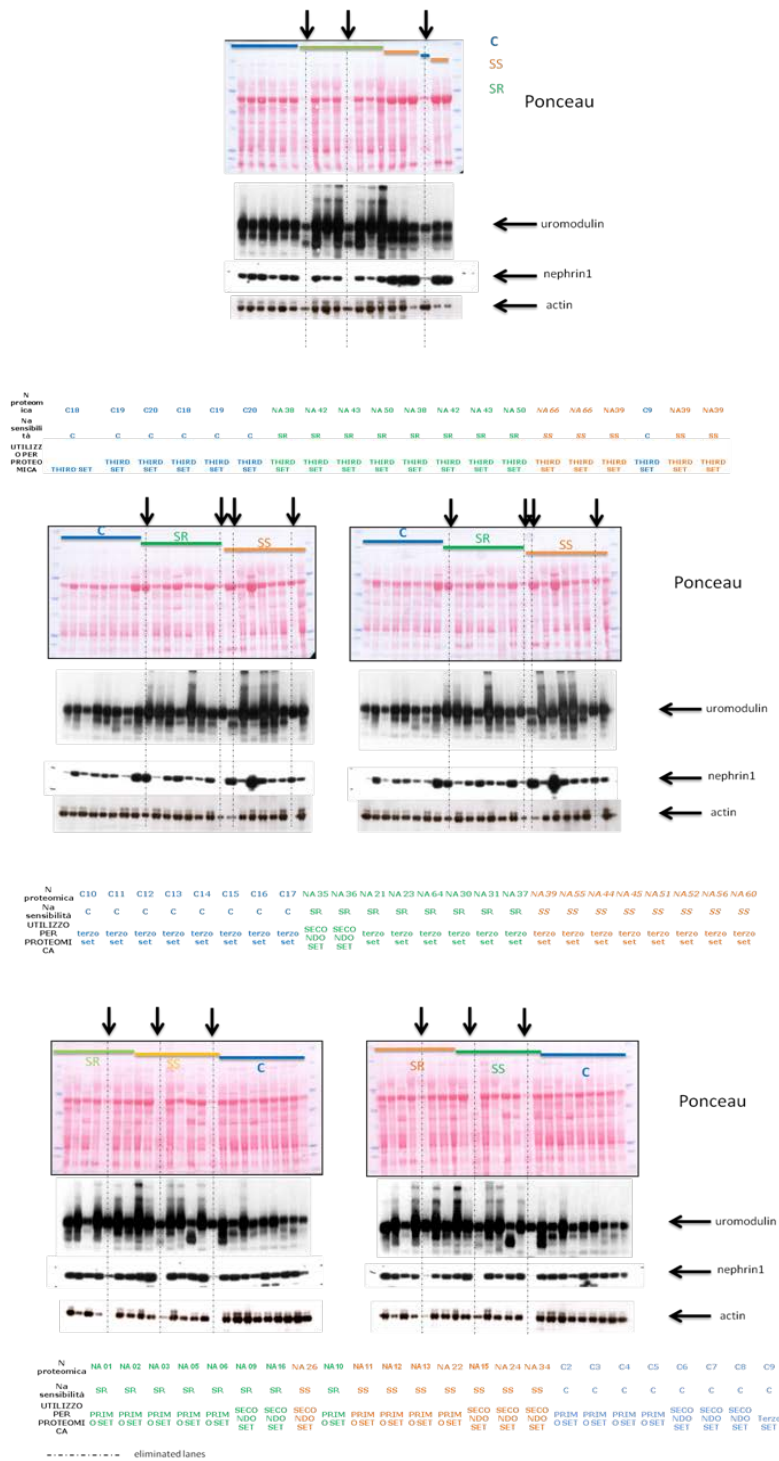

Ponceau and western blot analysis using antibodies against the proteins as indicated from 20 micrograms of concentrated urines from the patients as indicated. The symbols C, SS, SR stay for control, salt sensitive and salt resistant patients respectively.
